# Supplementary material for: Enantio- and diastereoselective hetero-Diels–Alder reactions between 2-aza-3-silyloxy-1,3-butadienes and aldehydes catalyzed by chiral dirhodium(ii) carboxamidates
Source: Royal Society of Chemistry journal article supplement (doi:10.1039/c2cc32876c), 2012-01-01
Supplement: c2cc32876c.pdf [file c2cc32876c.pdf]

**Electronic Supplementary Information for "Enantio- and diastereoselective hetero-Diels–Alder reactions between 2-aza-3-silyloxy-1,3-butadienes and aldehydes catalyzed by chiral dirhodium(II) carboxamidates"**

Yudai Watanabe, Takuya Washio, Janagiraman Krishnamurthi, Masahiro Anada\* and Shunichi Hashimoto\*

|                                                  |           |         |
|--------------------------------------------------|-----------|---------|
| General Methods                                  | — — — — — | S1      |
| Experimental Section                             | — — — — — | S1–S18  |
| Copies of $^1\text{H}/^{13}\text{C}$ NMR Spectra | — — — — — | S19–S42 |
| Copies of Chromatogram                           | — — — — — | S43–S62 |

**General.** Melting points were determined on a Yamato melting point apparatus model MP-21 and are uncorrected. IR spectra were recorded on a JASCO FT/IR-5300 spectrometer and absorbance bands are reported in wavenumber ( $\text{cm}^{-1}$ ).  $^1\text{H}$  NMR spectra were recorded on JEOL JNM-ECX 400P (400 MHz) spectrometer. Chemical shifts are reported relative to internal standard (tetramethylsilane;  $\delta_{\text{H}}$  0.00 or  $\text{CDCl}_3$ ;  $\delta_{\text{H}}$  7.26). Data are presented as follows: chemical shift ( $\delta$ , ppm), multiplicity (s = singlet, d = doublet, t = triplet, q = quartet, m = multiplet, br = broad), coupling constant and integration.  $^{13}\text{C}$  NMR spectra were recorded on JEOL JNM-ECX 400P (100 MHz) spectrometer. The following internal references were used ( $\text{CDCl}_3$ ;  $\delta$  77.0). Optical rotations were measured on a JASCO P-1030 digital polarimeter at the sodium D line (589 nm). EI-MS spectra were obtained on a JEOL JMS-FABmate spectrometer, operating with ionization energy of 70 eV. ESI-MS spectra were obtained on a Thermo Scientific Exactive spectrometer. Column chromatography was carried out on Kanto silica gel 60 N (63–210 mesh). Analytical thin layer chromatography (TLC) was carried out on Merck Kieselgel 60  $\text{F}_{254}$  plates with visualization by UV light, anisaldehyde stain solution or phosphomolybdic acid stain solution. Analytical high performance liquid chromatography (HPLC) was performed on a JASCO PU-1580 intelligent HPLC pump with JASCO UV-1575 intelligent UV/VIS detector. Detection was performed at 254 nm. Chiralcel OD-H and Chiralpak AD-H columns ( $0.46\text{ cm} \times 25\text{ cm}$ ) from Daicel were used. Retention times ( $t_{\text{R}}$ ) and peak ratios were determined with JASCO-Chrom NAV analysis system.

All non-aqueous reactions were carried out in flame-dried glassware under argon atmosphere unless otherwise noted. Reagents and solvents were purified by standard means. Dehydrated  $\text{CH}_2\text{Cl}_2$ , acetone, toluene and THF were purchased from Kanto Chemical Co., Inc. Diene **2a**, **2b** were prepared according to literature procedure.<sup>1,2</sup>

## Experimental Section

### Preparation of 2-aza-3-triethylsilyloxy-1-phenyl-1,3-butadiene (**2c**)

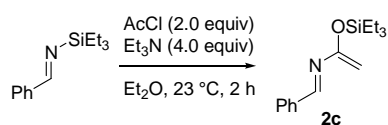

To a solution of *N*-triethylsilylbenzylidene (219 mg, 1.0 mmol)<sup>3</sup> and triethylamine (404 mg, 4.0 mmol) in ether (1 mL) was added dropwise a solution of acetyl chloride (157 mg, 2.0 mmol) in ether (1 mL) at 0 °C. After stirring for 2 h at room temperature, the precipitate was filtered through a plug of Celite, and the Celite filter cake was washed with ether (20 mL). The filtrate was concentrated *in vacuo*, and the residue was purified by column chromatography (Wakogel C-200, 2% Et<sub>3</sub>N in hexane) to afford **2c** (221 mg, 85%) as a light yellow oil; TLC  $R_f$  = 0.78 (2% Et<sub>3</sub>N in hexane); IR (film) 2955, 1623, 1603  $\text{cm}^{-1}$ ;  $^1\text{H}$  NMR (400 MHz,  $\text{CDCl}_3$ )  $\delta$  0.51 (q,  $J$  = 8.2 Hz, 6H, SiCH<sub>2</sub>CH<sub>3</sub>), 1.01 (t,  $J$  = 8.2 Hz, 9H, SiCH<sub>2</sub>CH<sub>3</sub>), 4.32 (s, 1H, C4-*H*), 4.64 (s, 1H, C4-*H*), 7.43–7.44 (m, 3H, *Ar*), 7.82–7.85 (m, 2H, *Ar*), 8.56 (s, 1H, C1-*H*);  $^{13}\text{C}$  NMR (100 MHz,  $\text{CDCl}_3$ )  $\delta$  4.8 (CH<sub>2</sub>), 6.4 (CH<sub>3</sub>), 91.7 (CH<sub>2</sub>), 128.6 (CH), 129.0 (CH), 131.1 (CH), 135.9 (C), 156.5 (CH), 156.6 (C); EI-HRMS calcd for C<sub>15</sub>H<sub>24</sub>NOSi

(M+H)<sup>+</sup> 262.16217, found 262.16239.

### Preparation of 2-aza-3-*tert*-butyldimethylsilyloxy-1-phenyl-1,3-pentadiene (**2d**)

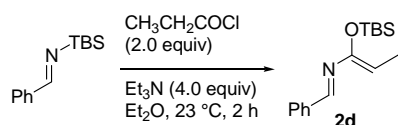

According to the procedure for the preparation of **2c**, **2d** was prepared from *N*-*tert*-butyldimethylsilylbenzylamine (439 mg, 2.0 mmol)<sup>4</sup>, propionyl chloride (370 mg, 4.0 mmol) and triethylamine (809 mg, 8.0 mmol). The crude product was purified by column chromatography (Wakogel C-200, 2% Et<sub>3</sub>N in hexane) to afford **2d** (513 mg, 93%) as a light yellow oil; TLC *R<sub>f</sub>* = 0.81 (2% Et<sub>3</sub>N in hexane); IR (film) 2930, 1647, 1591 cm<sup>-1</sup>; <sup>1</sup>H NMR (400 MHz, CDCl<sub>3</sub>) δ 0.17 (s, 6H, Si(CH<sub>3</sub>)<sub>2</sub>), 1.04 (s, 9H, SiC(CH<sub>3</sub>)<sub>3</sub>), 1.74 (d, *J* = 7.2 Hz, 3H, C5-*H*), 5.10 (q, *J* = 7.2 Hz, 1H, C4-*H*), 7.41–7.43 (m, 3H, *Ar*), 7.77–7.78 (m, 2H, *Ar*), 8.37 (s, 1H, C1-*H*); δ -3.7 (CH<sub>3</sub>), 12.0 (CH<sub>3</sub>), 18.4 (C), 25.9 (CH<sub>3</sub>), 103.5 (CH), 128.4 (CH), 128.6 (CH), 130.6 (CH), 136.1 (C), 152.7 (C), 153.4 (CH); ESI-HRMS calcd for C<sub>15</sub>H<sub>26</sub>NOSi (M+H)<sup>+</sup> 276.17782, found 276.17795.

### General procedure for asymmetric HDA reaction of 2-aza-3-silyloxydienes with aldehydes: (2*S*,6*S*)-2,6-Diphenyl-1,3-oxazinan-4-one (**5a**).<sup>5</sup>

To a solution of benzaldehyde (**3a**) (47.7 mg, 0.45 mmol) in CH<sub>2</sub>Cl<sub>2</sub> (0.4 mL) was added Rh<sub>2</sub>(*S*-BPTPI)<sub>4</sub>·3H<sub>2</sub>O (**1**) (4.3 mg, 0.003 mmol, 1 mol %). Then the color of solution was changed from colorless to brown. After stirring for 5 min, a solution of 2-azadiene **2a** (78.4 mg, 0.30 mmol) in CH<sub>2</sub>Cl<sub>2</sub> (0.2 mL) added at room temperature. After stirring at this temperature for 24 h, MeOH (ca. 0.1 mL) was added and the mixture was stirred for an additional 0.5 h. The mixture was concentrated *in vacuo* furnished the crude product (118 mg) as a purple solid, which was purified by column chromatography (silica gel, 9:1 CHCl<sub>3</sub>/EtOAc) to give **5a** (72.2 mg, 95%) as a white solid; mp 173.0–174.0 °C; TLC *R<sub>f</sub>* = 0.32 (1:1 CHCl<sub>3</sub>/EtOAc); [α]<sub>D</sub><sup>20</sup> -39.8 (*c* 1.03, CHCl<sub>3</sub>) for 98% ee; IR (KBr) 3242, 1666, 1631 cm<sup>-1</sup>; <sup>1</sup>H NMR (400 MHz, CDCl<sub>3</sub>) δ 2.77 (m, 2H, C5-*H*), 5.03 (dd, *J* = 4.6, 7.3 Hz, 1H, C6-*H*), 5.93 (s, 1H, C2-*H*), 6.62 (br, 1H, NH), 7.31–7.53 (m, 10H, *Ar*); <sup>13</sup>C NMR (100 MHz, CDCl<sub>3</sub>) δ 39.1 (CH<sub>2</sub>), 76.6 (CH), 85.7 (CH), 125.7 (CH), 126.9 (CH), 128.3 (CH), 128.7 (CH), 128.9 (CH), 130.0 (CH), 137.7 (CH), 139.6 (C), 168.8 (C=O); EI-HRMS calcd for C<sub>16</sub>H<sub>15</sub>NO<sub>2</sub> (M)<sup>+</sup> 253.1103, found 253.1099. The enantiomeric excess of **5a** was determined to be 98% by HPLC with a Chiralpak AD-H column (9:1 hexane/*i*-PrOH, 1.0 mL/min): *t<sub>R</sub>* (minor) = 15.3 min for (2*R*,6*R*)-enantiomer; *t<sub>R</sub>* (major) = 17.4 min for (2*S*,6*S*)-enantiomer. A sample for combustion analysis was obtained by recrystallizations from *i*-PrOH as colorless needles (>99% ee); mp 173.5–174.5 °C; Anal. Calcd for C<sub>16</sub>H<sub>15</sub>NO<sub>2</sub>: C, 75.87; H, 5.97; N, 5.53. Found: C, 75.99; H, 5.96; N, 5.56. In order to assign the stereochemistry at C2 and C6, NOE studies were performed on **5a**. Irradiation of C2-*H* showed NOE with C6-*H* (12.2%) and the

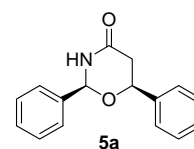

*ortho* proton of the phenyl group (6.0%). Additionally, irradiation of C6–H exhibited NOE with C2–H (12.1%), C5eq–H (5.1%) and the *ortho* proton of the phenyl group (4.6%). These data revealed *cis* relationship between C2–H and C6–H.

### Determination of absolute configuration of **5a**:

#### Methyl (*S*)-3-hydroxy-3-phenyl-propionate (**9a**).<sup>6</sup>

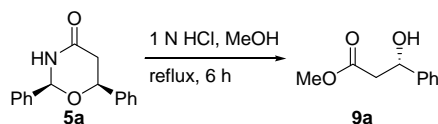

AcCl (0.14 mL, 2 mmol) was added to MeOH (1 mL). This solution was added to a solution of **5a** (40.0 mg, 0.14 mmol, 98% ee) in MeOH (1 mL) at 0 °C. After stirring at reflux temperature for 6 h, the reaction was quenched with saturated NaHCO<sub>3</sub> (2 mL), and the whole was extracted with EtOAc (20 mL). The organic layer was washed with water (3 mL) and brine (2 × 3 mL), and dried over anhydrous Na<sub>2</sub>SO<sub>4</sub>. The solvent was removed *in vacuo* to give the crude product (41 mg) as a yellow oil, which was purified by column chromatography (4:1 hexane/EtOAc) to afford **9a** (26.6 mg, 89%) as a colorless oil; TLC *R*<sub>f</sub> = 0.24 (2:1 hexane/EtOAc); [α]<sub>D</sub><sup>22</sup> –51.6 (*c* 0.95, CHCl<sub>3</sub>) for 97% ee [lit.,<sup>6</sup> [α]<sub>D</sub><sup>20</sup> +46.9 (*c* 1.2, CHCl<sub>3</sub>) for (*R*)-enantiomer]; <sup>1</sup>H NMR (400 MHz, CDCl<sub>3</sub>) δ 2.73 (dd, *J* = 4.1, 16.3 Hz, 1H, C2–H), 2.77 (dd, *J* = 9.1, 16.3 Hz, 1H, C2–H), 3.21 (d, *J* = 3.6, 1H, OH), 3.73 (s, 3H, OCH<sub>3</sub>), 5.15 (ddd, *J* = 3.6, 4.1, 16.3 Hz, 1H, C3–H), 7.28–7.40 (m, 5H, *Ar*). This product **9a** exhibited spectroscopic data identical to (*R*)-**9a**<sup>6</sup>, except for the sign of optical rotation. Thus, the preferred absolute stereochemistry of **5a** was determined to be (2*S*,6*S*).

### NMR Analysis of **4a**.

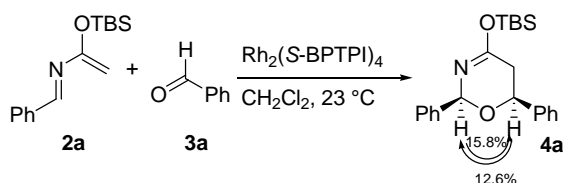

A solution of diene **2a** (52.3 mg, 0.20 mmol) in CH<sub>2</sub>Cl<sub>2</sub> (0.2 mL) was added to a solution of benzaldehyde (**3a**) (23.3 mg, 0.22 mmol) and Rh<sub>2</sub>(*S*-BPTPI)<sub>4</sub>·3H<sub>2</sub>O (**1**) (5.73 mg, 0.004 mmol, 2 mol %) in CH<sub>2</sub>Cl<sub>2</sub> (0.05 mL). After stirring for 16 h, the reaction mixture was concentrated *in vacuo* to furnish the crude **4a** (75 mg) as a purple solid; <sup>1</sup>H NMR showed exclusive formation of **4a**; <sup>1</sup>H NMR (400 MHz, C<sub>6</sub>D<sub>6</sub>) δ 0.35 (s, 3H, SiCH<sub>3</sub>), 0.47 (s, 3H, SiCH<sub>3</sub>), 1.02 (s, 9H, SiC(CH<sub>3</sub>)<sub>3</sub>), 2.14 (ddd, *J* = 2.3, 4.6, 17.2 Hz, 1H, C5–H), 2.20 (ddd, *J* = 2.9, 10.9, 17.2, 1H, C5–H), 4.40 (dd, *J* = 4.6, 10.9 Hz, 1H, C2–H), 5.95 (s, 1H, C2–H), 7.07–7.32 (m, 8H, *Ar*), 7.79–7.81 (m, 2H, *Ar*). In order to assign the stereochemistry at C2 and C6, NOE studies were performed on **4a**. Irradiation of C2–H showed NOE with C6–H (12.6%). Additionally, irradiation of C6–H exhibited NOE with the C2–H (15.8%). These data revealed *cis* relationship between C2–H and C6–H.

**(2*S*,6*S*)-6-(4-nitrophenyl)-2-phenyl-1,3-oxazinan-4-one (5b).**

According to the general procedure for asymmetric HDA reaction of 2-aza-3-silyloxydienes with aldehydes, **5b** was prepared from diene **2a** (78.4 mg, 0.30 mmol), *p*-nitrobenzaldehyde (**3b**) (68.0 mg, 0.45 mmol), and Rh<sub>2</sub>(*S*-BPTPI)<sub>4</sub>·3H<sub>2</sub>O (**1**) (4.30 mg, 0.003 mmol, 1 mol %) at 0 °C.

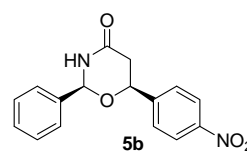

The crude product was purified by column chromatography (silica gel, 1:3 hexane/EtOAc) to provide **5b** (87.6 mg, 98%) as a white solid; mp 134.0–135.0 °C; TLC *R<sub>f</sub>* = 0.22 (1:3 hexane/EtOAc); [α]<sub>D</sub><sup>19</sup> –51.0 (*c* 1.01, CHCl<sub>3</sub>) for 91% ee; IR (KBr) 3176, 1669, 1602, 1519 cm<sup>-1</sup>; <sup>1</sup>H NMR (400 MHz, CDCl<sub>3</sub>) δ 2.51 (dd, *J* = 4.1, 17.4 Hz, 1H, C5-*H*), 2.72 (dd, *J* = 11.0, 17.4 Hz, 1H, C5-*H*), 5.06 (dd, 1H, C6-*H*), 5.87 (s, 1H, C2-*H*), 7.12 (br, 1H, *NH*), 7.35–7.48 (m, 7H, *Ar*), 8.12–8.15 (m, 2H, *Ar*); <sup>13</sup>C NMR (100 MHz, CDCl<sub>3</sub>) δ 38.7 (CH<sub>2</sub>), 75.3 (CH), 85.6 (CH), 123.9 (CH), 126.2 (CH), 126.8 (CH), 128.9 (CH), 130.1 (CH), 137.2 (C), 146.8 (C), 147.5 (C), 168.0 (C=O); EI-HRMS calcd for C<sub>17</sub>H<sub>13</sub>N<sub>2</sub>O<sub>4</sub> (*M*-H)<sup>+</sup> 297.0954, found 297.0871. The enantiomeric excess of **5b** was determined to be 91% by HPLC with a Chiralpak AD-H column (1:1 hexane/*i*-PrOH, 1.0 mL/min): *t<sub>R</sub>* (minor) = 9.7 min for (2*R*, 6*R*)-enantiomer; *t<sub>R</sub>* (major) = 17.6 min for (2*S*, 6*S*)-enantiomer. The preferred absolute configuration of **5b** was not determined. A sample for combustion analysis was obtained by recrystallizations from *i*-PrOH as colorless needles (89% ee); mp 135.5–136.0 °C; Anal. Calcd for C<sub>17</sub>H<sub>14</sub>N<sub>2</sub>O<sub>4</sub>: C, 64.42; H, 4.73; N, 9.39. Found: C, 64.46; H, 4.70; N, 9.43.

**Determination of absolute configuration of 5b:**

**Methyl (S)-3-hydroxy-3-(4-nitrophenyl) propionate (9b).<sup>7</sup>**

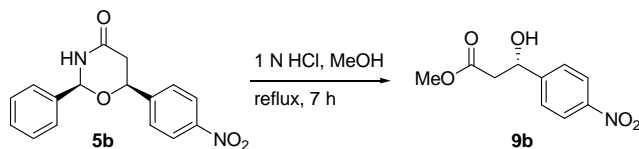

According to the procedure for the preparation of **9a**, **9b** was prepared from **5b** (40 mg, 0.13 mmol, 91% ee), AcCl (0.14 mL, 2 mmol) and MeOH (2 mL). The crude product was purified by column chromatography (silica gel, 2:1 hexane/EtOAc) to provide **9b** (28.9 mg, 96%) as a colorless oil; TLC *R<sub>f</sub>* = 0.56 (1:1 hexane/EtOAc); [α]<sub>D</sub><sup>19</sup> –35.6 (*c* 1.18, CHCl<sub>3</sub>) for 91% ee [lit.,<sup>7</sup> [α]<sub>D</sub><sup>20</sup> –37.1 (*c* 1.01, CHCl<sub>3</sub>) for 94% ee]; <sup>1</sup>H NMR (400 MHz, CDCl<sub>3</sub>) δ 2.68–2.79 (m, 2H, C2-*H*), 3.57 (br, 1H, *OH*), 3.75 (s, 3H, OCH<sub>3</sub>), 5.25 (dd, *J* = 4.1, 8.2 Hz, 1H, C3-*H*), 7.56–7.58 (m, 2H, *Ar*), 8.22–8.24 (m, 2H, *Ar*). This product **9b** exhibited spectroscopic data identical to (*S*)-**9b**<sup>7</sup>. Thus, the preferred absolute stereochemistry of **5b** was determined to be (2*S*,6*S*)

**(2*S*\*,6*S*\*)-2-Phenyl-6-(4-trifluoromethylphenyl)-1,3-oxazinan-4-one (5c).**

According to the general procedure for asymmetric HDA reaction of 2-aza-3-silyloxydienes with aldehydes, **5c** was prepared from diene **2a** (78.4 mg, 0.30 mmol), *p*-trifluoromethylbenzaldehyde (**3c**) (78.3 mg, 0.45 mmol), and Rh<sub>2</sub>(*S*-BPTPI)<sub>4</sub>·3H<sub>2</sub>O (**1**) (4.30 mg, 0.003 mmol, 1

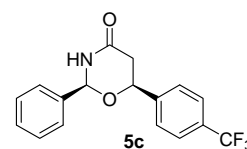

mol %). The crude product was purified by column chromatography (silica gel, 1:2 hexane/EtOAc) to provide **5c** (92.5 mg, 96%) as a white solid; mp 147.0–148.0 °C; TLC  $R_f$  = 0.31 (1:3 hexane/EtOAc);  $[\alpha]_D^{19}$  –38.6 ( $c$  1.02, CHCl<sub>3</sub>) for 94% ee; IR (KBr) 3161, 1670, 1619 cm<sup>-1</sup>; <sup>1</sup>H NMR (400 MHz, CDCl<sub>3</sub>)  $\delta$  2.63 (dd,  $J$  = 11.3, 17.2 Hz, 1H, C5–H), 2.76 (dd,  $J$  = 3.6, 17.2 Hz, 1H, C5–H), 5.04 (dd,  $J$  = 3.6, 11.3 Hz, 1H, C6–H), 5.88 (s, 1H, C2–H), 6.37 (br, 1H, NH), 7.32–7.58 (m, 9H, *Ar*); <sup>13</sup>C NMR (100 MHz, CDCl<sub>3</sub>)  $\delta$  38.9 (CH<sub>2</sub>), 75.8 (CH), 85.7 (CH), 123.9 (q,  $J$  = 271 Hz, C), 125.6 (q,  $J$  = 3.8 Hz, CH), 125.8 (CH), 126.8 (CH), 128.9 (CH), 130.0 (CH), 130.3 (q,  $J$  = 32.4 Hz, C), 137.4 (C), 143.6 (C), 168.4 (C=O); EI-HRMS calcd for C<sub>17</sub>H<sub>13</sub>NO<sub>2</sub>F<sub>3</sub> (M–H)<sup>+</sup> 320.0977, found 320.0892. The enantiomeric excess of **5c** was determined to be 94% by HPLC with a Chiralpak AD-H column (9:1 hexane/*i*-PrOH, 1.0 mL/min):  $t_R$  = 15.2 min for minor enantiomer;  $t_R$  = 20.6 min for major enantiomer. The preferred absolute configuration of **5c** was not determined. A sample for combustion analysis was obtained by recrystallizations from *i*-PrOH as colorless needles (93% ee); mp 148.0–148.5 °C; Anal. Calcd for C<sub>17</sub>H<sub>14</sub>NO<sub>2</sub>F<sub>3</sub>: C, 63.55; H, 4.39; N, 4.36. Found: C, 63.61; H, 4.37; N, 4.29.

**(2*S*\*,6*S*\*)-6-(4-Mesyloxyphenyl)-2-phenyl-1,3-oxazinan-4-one (5d).**

According to the general procedure for asymmetric HDA reaction of 2-aza-3-silyloxydienes with aldehydes, **5d** was prepared from diene **2a** (78.4 mg, 0.30 mmol), 4-mesyloxybenzaldehyde (**3d**)<sup>8</sup> (90.0 mg, 0.45 mmol), and Rh<sub>2</sub>(*S*-BPTPI)<sub>4</sub>·3H<sub>2</sub>O (**1**) (4.30 mg, 0.003 mmol, 1 mol %).

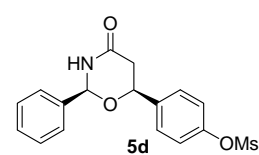

The crude product was purified by column chromatography (silica gel, 1:3 hexane/EtOAc) to provide **5d** (101 mg, 97%) as a white solid; mp 141.0–142.5 °C; TLC  $R_f$  = 0.45 (EtOAc);  $[\alpha]_D^{19}$  –29.9 ( $c$  1.04, CHCl<sub>3</sub>) for 90% ee; IR (KBr) 3174, 1661, 1506, 1347 cm<sup>-1</sup>; <sup>1</sup>H NMR (400 MHz, CDCl<sub>3</sub>)  $\delta$  2.63 (dd,  $J$  = 10.8, 16.9 Hz, 1H, C5–H), 2.76 (dd,  $J$  = 4.0, 16.9 Hz, 1H, C5–H), 3.11 (s, 3H, SO<sub>2</sub>CH<sub>3</sub>), 5.02 (dd,  $J$  = 4.0, 10.8 Hz, 1H, C6–H), 5.89 (s, 1H, C2–H), 7.07 (br, 1H, NH), 7.32–7.58 (m, 9H, *Ar*); <sup>13</sup>C NMR (100 MHz, CDCl<sub>3</sub>)  $\delta$  37.3 (CH<sub>3</sub>), 38.8 (CH<sub>2</sub>), 75.6 (CH), 85.6 (CH), 122.2 (q,  $J$  = 271 Hz, C), 126.8 (CH), 127.3 (CH), 128.8 (CH), 129.9 (CH), 137.4 (C), 139.0 (C), 148.8 (C), 168.5 (C=O); EI-HRMS calcd for C<sub>17</sub>H<sub>16</sub>NO<sub>5</sub>S (M–H)<sup>+</sup> 346.0827, found 346.0746. The enantiomeric excess of **5d** was determined to be 90% by HPLC with a Chiralpak AD-H column (1:1 hexane/*i*-PrOH, 1.0 mL/min):  $t_R$  = 11.7 min for minor enantiomer;  $t_R$  = 20.4 min for major enantiomer. The preferred absolute configuration of **5d** was not determined. The preferred absolute configuration of **5d** was not determined. A sample for combustion analysis was obtained by recrystallizations from *i*-PrOH as colorless needles (92% ee); mp 141.5–142.5 °C; Anal. Calcd for C<sub>17</sub>H<sub>17</sub>NO<sub>5</sub>S: C, 58.78; H, 4.93; N, 4.03; S, 9.23. Found: C, 58.77; H, 4.86; N, 4.02; S, 9.20.



**(2*S*\*,6*S*\*)-6-(4-Chlorophenyl)-2-phenyl-1,3-oxazinan-4-one (5e).**

According to the general procedure for asymmetric HDA reaction of 2-aza-3-silyloxydienes with aldehydes, **5e** was prepared from diene **2a** (78.4 mg, 0.30 mmol), *p*-chlorobenzaldehyde (**3e**) (78.3 mg, 0.45 mmol), and Rh<sub>2</sub>(*S*-BPTPI)<sub>4</sub>·3H<sub>2</sub>O (**1**) (4.30 mg, 0.003 mmol, 1 mol %). The crude product was purified by column chromatography (silica gel, 9:1 CHCl<sub>3</sub>/EtOAc) to provide **5e** (79.6 mg, 93%) as a white solid; mp 149.0–150.0 °C; TLC *R*<sub>f</sub> = 0.27 (1:1 CHCl<sub>3</sub>/EtOAc); [α]<sub>D</sub><sup>20</sup> –37.5 (*c* 1.14, CHCl<sub>3</sub>) for 94% ee; IR (KBr) 3170, 1662, 1494 cm<sup>–1</sup>; <sup>1</sup>H NMR (400 MHz, CDCl<sub>3</sub>) δ 2.71 (dd, *J* = 11.2, 17.4 Hz, 1H, C5–*H*), 2.79 (dd, *J* = 4.5, 17.4 Hz, 1H, C5–*H*), 5.02 (dd, *J* = 4.5, 11.2 Hz, 1H, C6–*H*), 5.93 (s, 1H, C2–*H*), 6.19 (br, 1H, *NH*), 7.32–7.53 (m, 9H, *Ar*); <sup>13</sup>C NMR (100 MHz, CDCl<sub>3</sub>) δ 39.0 (CH<sub>2</sub>), 75.9 (CH), 85.7 (CH), 126.8 (CH), 127.0 (CH), 128.82 (CH), 128.86 (CH), 130.0 (CH), 134.0 (C), 137.5 (C), 138.2 (C), 168.5 (C=O); EI-HRMS calcd for C<sub>16</sub>H<sub>13</sub>NO<sub>2</sub>Cl (M–H)<sup>+</sup> 286.0713, found 286.0631. The enantiomeric excess of **5e** was determined to be 94% by HPLC with a Chiralpak AD-H column (9:1 hexane/*i*-PrOH, 1.0 mL/min): *t*<sub>R</sub> = 17.3 min for minor enantiomer; *t*<sub>R</sub> = 33.3 min for major enantiomer. The preferred absolute configuration of **5e** was not determined. A sample for combustion analysis was obtained by recrystallizations from *i*-PrOH as colorless needles (99% ee); mp 149.5–150.0 °C; Anal. Calcd for C<sub>16</sub>H<sub>14</sub>NO<sub>2</sub>Cl: C, 66.79; H, 4.90; N, 4.87; Cl, 12.32. Found: C, 67.00; H, 4.95; N, 4.89; Cl, 12.15.

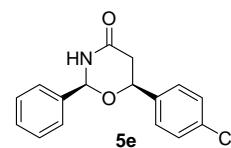

**(2*S*\*,6*S*\*)-6-(4-Methylphenyl)-2-phenyl-1,3-oxazinan-4-one (5f).**

According to the general procedure for asymmetric HDA reaction of 2-aza-3-silyloxydienes with aldehydes, **5f** was prepared from diene **2a** (78.4 mg, 0.30 mmol), *p*-tolualdehyde (**3f**) (54.1 mg, 0.45 mmol), and Rh<sub>2</sub>(*S*-BPTPI)<sub>4</sub>·3H<sub>2</sub>O (**1**) (4.30 mg, 0.003 mmol, 1 mol %). The crude product was purified by column chromatography (silica gel, 9:1 CHCl<sub>3</sub>/EtOAc) to provide **5f** (77.8 mg, 97%) as a white solid; mp 151.0–152.0 °C; TLC *R*<sub>f</sub> = 0.27 (1:1 CHCl<sub>3</sub>/EtOAc); [α]<sub>D</sub><sup>21</sup> –28.3 (*c* 1.04, CHCl<sub>3</sub>) for 96% ee; IR (KBr) 3247, 1665, 1632 cm<sup>–1</sup>; <sup>1</sup>H NMR (400 MHz, CDCl<sub>3</sub>) δ 2.34 (s, 3H, Ar–CH<sub>3</sub>), 2.73 (s, 1H, C5–*H*), 2.76 (d, *J* = 7.6 Hz, 1H, C5–*H*), 4.98 (t, *J* = 1.4 Hz, 1H, C6–*H*), 5.90 (s, 1H, C2–*H*), 6.52 (br, 1H, *NH*), 7.16–7.51 (m, 9H, *Ar*); <sup>13</sup>C NMR (100 MHz, CDCl<sub>3</sub>) δ 21.1 (CH<sub>3</sub>), 38.9 (CH<sub>2</sub>), 76.3 (CH), 85.5 (CH), 125.6 (CH), 126.7 (CH), 128.7 (CH), 129.2 (CH), 129.7 (CH), 136.7 (C), 137.8 (C), 138.0 (C), 169.1 (C=O); EI-HRMS calcd for C<sub>17</sub>H<sub>16</sub>NO<sub>2</sub> (M–H)<sup>+</sup> 266.11810, found 266.11799. The enantiomeric excess of **5f** was determined to be 96% by HPLC with a Chiralpak AD-H column (9:1 hexane/*i*-PrOH, 1.0 mL/min): *t*<sub>R</sub> = 15.1 min for minor enantiomer; *t*<sub>R</sub> = 23.1 min for major enantiomer. The preferred absolute configuration of **5f** was not determined. A sample for combustion analysis was obtained by recrystallizations from *i*-PrOH as colorless needles (99% ee); mp 151.0–152.0 °C; Anal. Calcd for C<sub>17</sub>H<sub>17</sub>NO<sub>2</sub>: C, 76.38; H, 6.41; N, 5.24. Found: C, 76.16; H, 6.25; N, 5.23.

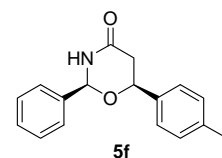

**(2*S*\*,6*S*\*)-6-(3-Methylphenyl)-2-phenyl-1,3-oxazinan-4-one (5g).**

According to the general procedure for asymmetric HDA reaction of 2-aza-3-silyloxydienes with aldehydes, **5g** was prepared from diene **2a** (78.4 mg, 0.30 mmol), *m*-tolualdehyde (**3g**) (54.1 mg, 0.45 mmol), and Rh<sub>2</sub>(*S*-BPTPI)<sub>4</sub>·3H<sub>2</sub>O (**1**) (4.30 mg, 0.003 mmol, 1 mol %). The crude product was purified by column chromatography (silica gel, 9:1 CHCl<sub>3</sub>/EtOAc) to provide **5g** (67.4 mg, 84%) as a white solid; mp 123.0–124.0 °C; TLC *R*<sub>f</sub> = 0.27 (1:1 CHCl<sub>3</sub>/EtOAc); [α]<sub>D</sub><sup>22</sup> –26.9 (*c* 1.16, CHCl<sub>3</sub>) for 92% ee; IR (KBr) 3178, 1679, 1633 cm<sup>–1</sup>; <sup>1</sup>H NMR (400 MHz, CDCl<sub>3</sub>) δ 2.28 (s, 3H, Ar–CH<sub>3</sub>), 2.68 (s, 1H, C5–H), 2.69 (s, 1H, C5–H), 4.91 (t, *J* = 7.6 Hz, 1H, C6–H), 5.84 (s, 1H, C2–H), 6.38 (br, 1H, NH), 7.05–7.46 (m, 9H, *Ar*); <sup>13</sup>C NMR (100 MHz, CDCl<sub>3</sub>) δ 21.4 (CH<sub>3</sub>), 39.0 (CH<sub>2</sub>), 76.6 (CH), 85.7 (CH), 122.7 (CH), 126.3 (CH), 126.9 (CH), 128.5 (CH), 128.7 (CH), 129.0 (CH), 129.9 (CH), 137.7 (C), 138.4 (C), 139.6 (C), 169.0 (C=O); EI-HRMS calcd for C<sub>17</sub>H<sub>16</sub>NO<sub>2</sub> (M–H)<sup>+</sup> 266.11810, found 266.11836. A sample for combustion analysis was obtained by recrystallizations from *i*-PrOH as colorless needles (>99% ee); mp 123.5–124.5 °C; Anal. Calcd for C<sub>17</sub>H<sub>17</sub>NO<sub>2</sub>: C, 76.38; H, 6.41; N, 5.24. Found: C, 76.20; H, 6.31; N, 5.17.

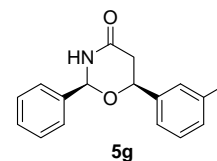

**Determination of enantiomeric excess of 5g:**

**Methyl (*S*)-3-hydroxy-3-(3-methylphenyl)propionate (9g).<sup>9</sup>**

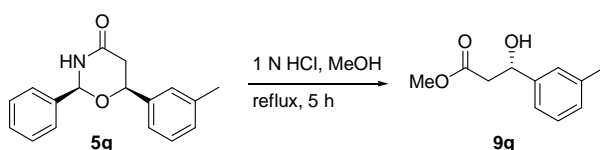

According to the procedure for the preparation of **9a**, **9g** was prepared from **5g** (72.4 mg, 0.27 mmol), AcCl (0.14 mL, 2 mmol) and MeOH (2 mL). The crude product was purified by column chromatography (silica gel, 6:1 hexane/EtOAc) to provide **9g** (28.9 mg, 96%) as a colorless oil; TLC *R*<sub>f</sub> = 0.43 (2:1 hexane/EtOAc); [α]<sub>D</sub><sup>20</sup> –43.7 (*c* 1.00, CHCl<sub>3</sub>) for 92% ee; <sup>1</sup>H NMR (400 MHz, CDCl<sub>3</sub>) δ 2.36 (s, 3H, Ar–CH<sub>3</sub>), 2.71 (dd, *J* = 3.6, 16.3 Hz, 1H, C2–H), 2.77 (dd, *J* = 9.1, 16.3 Hz, 1H, C2–H), 3.17 (br, 1H, OH), 3.74 (s, 3H, OCH<sub>3</sub>), 5.11 (dd, *J* = 3.6, 9.1 Hz, 1H, C3–H), 7.09–7.27 (m, 4H, *Ar*). The enantiomeric excess of **9g** was determined to be 92% by HPLC with a Chiralcel OD-H column (19:1 hexane/*i*-PrOH, 1.0 mL/min): *t*<sub>R</sub> = 14.4 min for major enantiomer; *t*<sub>R</sub> = 24.7 min for minor enantiomer. The preferred absolute configuration of **5g** was not determined.

**(2*S*\*,6*S*\*)-6-(3-Chlorophenyl)-2-phenyl-1,3-oxazinan-4-one (5h).**

According to the general procedure for asymmetric HDA reaction of 2-aza-3-silyloxydienes with aldehydes, **5h** was prepared from diene **2a** (78.4 mg, 0.30 mmol), *m*-chlorobenzaldehyde (**3h**) (78.3 mg, 0.45 mmol), and Rh<sub>2</sub>(*S*-BPTPI)<sub>4</sub>·3H<sub>2</sub>O (**1**) (4.30 mg, 0.003 mmol, 1 mol %). The crude

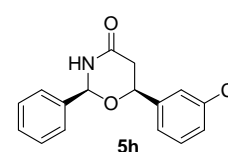



product was purified by column chromatography (silica gel, 9:1 CHCl<sub>3</sub>/EtOAc) to provide **5h** (79.0 mg, 92%) as a white solid; mp 144.0–145.0 °C; TLC  $R_f$  = 0.27 (1:1 CHCl<sub>3</sub>/EtOAc);  $[\alpha]_D^{20}$  –34.0 ( $c$  1.02, CHCl<sub>3</sub>) for 92% ee; IR (KBr) 3167, 1656, 1473 cm<sup>–1</sup>; <sup>1</sup>H NMR (400 MHz, CDCl<sub>3</sub>)  $\delta$  2.71 (dd,  $J$  = 11.2, 17.4 Hz, 1H, C5–*H*), 2.79 (dd,  $J$  = 4.5, 17.4 Hz, 1H, C5–*H*), 5.02 (dd,  $J$  = 4.5, 11.2 Hz, 1H, C6–*H*), 5.92 (s, 1H, C2–*H*), 6.35 (br, 1H, NH), 7.30–7.53 (m, 9H, *Ar*); <sup>13</sup>C NMR (100 MHz, CDCl<sub>3</sub>)  $\delta$  38.9 (CH<sub>2</sub>), 75.8 (CH), 85.7 (CH), 123.7 (CH), 125.8 (CH), 126.9 (CH), 128.4 (CH), 128.9 (CH), 129.94 (CH), 129.99 (CH), 134.6 (C), 137.5 (C), 141.7 (C), 168.5 (C=O); EI-HRMS calcd for C<sub>16</sub>H<sub>13</sub>NO<sub>2</sub>Cl (M–H)<sup>+</sup> 286.0713, found 286.0634. The enantiomeric excess of **5h** was determined to be 92% by HPLC with a Chiralpak AD-H column (9:1 hexane/*i*-PrOH, 1.0 mL/min):  $t_R$  = 16.3 min for major enantiomer;  $t_R$  = 17.4 min for minor enantiomer. The preferred absolute configuration of **5h** was not determined. A sample for combustion analysis was obtained by recrystallizations from 1:3 hexane/EtOAc as colorless needles (95% ee); mp 144.5–145.0 °C; Anal. Calcd for C<sub>16</sub>H<sub>14</sub>NO<sub>2</sub>Cl: C, 66.79; H, 4.90; N, 4.87; Cl, 12.32. Found: C, 66.90; H, 4.87; N, 4.90; Cl, 12.12.

**(2*S*\*,6*S*\*)-6-(4-Methylphenyl)-2-phenyl-1,3-oxazinan-4-one (5i).**

According to the general procedure for asymmetric HDA reaction of 2-aza-3-silyloxydienes with aldehydes, **5i** was prepared from diene **2a** (78.4 mg, 0.30 mmol), *p*-anisaldehyde (**3i**) (61.2 mg, 0.45 mmol), and Rh<sub>2</sub>(*S*-BPTPI)<sub>4</sub>·3H<sub>2</sub>O (**1**) (4.30 mg, 0.003 mmol, 1 mol %) at 30 °C. The crude product was purified by column chromatography (silica gel, 1:2 hexane/EtOAc) to provide **5i** (54.4 mg, 64%) as a white solid; mp 140.5–141.5 °C; TLC  $R_f$  = 0.53 (1:3 hexane/EtOAc);  $[\alpha]_D^{21}$  –25.0 ( $c$  1.01, CHCl<sub>3</sub>) for 92% ee; IR (KBr) 3174, 1668, 1613, 1251 cm<sup>–1</sup>; <sup>1</sup>H NMR (400 MHz, CDCl<sub>3</sub>)  $\delta$  2.76–2.80 (m, 2H, C5–*H*), 3.80 (s, 3H, ArOCH<sub>3</sub>), 4.98 (dd,  $J$  = 4.5, 10.4 Hz, 1H, C6–*H*), 5.92 (s, 1H, C2–*H*), 6.20 (br, 1H, NH), 6.89–6.92 (m, 2H, *Ar*), 7.32–7.52 (m, 7H, *Ar*); <sup>13</sup>C NMR (100 MHz, CDCl<sub>3</sub>)  $\delta$  38.9 (CH<sub>2</sub>), 55.2 (CH<sub>3</sub>), 76.3 (CH), 85.6 (CH), 114.0 (CH), 126.8 (CH), 127.1 (CH), 128.7 (CH), 129.8 (CH), 131.7 (C), 137.8 (C), 159.5 (C), 169.1 (C=O); EI-HRMS calcd for C<sub>17</sub>H<sub>16</sub>NO<sub>3</sub> (M–H)<sup>+</sup> 283.12084, found 283.1062. The enantiomeric excess of **5i** was determined to be 92% by HPLC with a Chiralpak AD-H column (3:1 hexane/*i*-PrOH, 1.0 mL/min):  $t_R$  = 10.4 min for minor enantiomer;  $t_R$  = 17.2 min for major enantiomer. The preferred absolute configuration of **5i** was not determined. A sample for combustion analysis was obtained by recrystallizations from *i*-PrOH as colorless needles (91% ee); mp 141.0–142.0 °C; Anal. Calcd for C<sub>17</sub>H<sub>18</sub>NO<sub>3</sub>: C, 72.07; H, 6.05; N, 4.94. Found: C, 71.91; H, 5.93; N, 4.91.

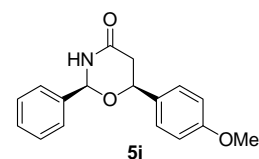

### (2*S*,6*S*)-2-Phenyl-6-phenylethynyl-1,3-oxazinan-4-one (**5j**).

According to the general procedure for asymmetric HDA reaction of 2-aza-3-silyoxydienes with aldehydes, **5j** was prepared from diene **2a** (78.4 mg, 0.30 mmol), phenylpropargylaldehyde (**3j**) (58.6 mg, 0.45 mmol), and Rh<sub>2</sub>(*S*-BPTPI)<sub>4</sub>·3H<sub>2</sub>O (4.30 mg, 0.003 mmol, 1 mol %) at 0 °C. The crude product was purified by column chromatography (silica gel, 9:1 CHCl<sub>3</sub>/EtOAc) to provide **5j** (82.1 mg, 99%) as a white solid; mp 200–201 °C; TLC *R<sub>f</sub>* = 0.28 (2:1 CHCl<sub>3</sub>/EtOAc); [α]<sub>D</sub><sup>21</sup> –42.7 (*c* 1.02, CHCl<sub>3</sub>) for 95% ee; IR (KBr) 2234, 1672 cm<sup>–1</sup>; <sup>1</sup>H NMR (400 MHz, CDCl<sub>3</sub>) δ 2.82 (dd, *J* = 4.0, 11.3 Hz, 1H, C5–*H*), 2.97 (dd, *J* = 11.3, 17.2 Hz, 1H, C5–*H*), 4.98 (dd, *J* = 4.0, 17.2 Hz, 1H, C6–*H*), 5.82 (s, 1H, C2–*H*), 6.20 (br, 1H, *NH*), 7.28–7.36 (m, 3H, *Ar*), 7.43–7.52 (m, 7H, *Ar*); <sup>13</sup>C NMR (100 MHz, CDCl<sub>3</sub>) δ 38.0 (CH<sub>2</sub>), 65.9 (CH), 85.1 (C), 85.7 (CH), 87.0 (C), 121.6 (C), 127.1 (CH), 128.3 (CH), 128.9 (CH), 129.0 (CH), 130.2 (CH), 131.9 (CH), 137.0 (C), 167.8 (C=O); EI-HRMS calcd for C<sub>18</sub>H<sub>14</sub>NO<sub>2</sub> (*M*–*H*)<sup>+</sup> 276.1024, found 276.1015. The enantiomeric excess of **5j** was determined to be 95% by HPLC with a Chiralcel OD-H column (1:1 hexane/*i*-PrOH, 1.0 mL/min): *t<sub>R</sub>* (minor) = 8.2 min for (2*R*,6*R*)-enantiomer; *t<sub>R</sub>* (major) = 14.1 min for (2*S*,6*S*)-enantiomer. A sample for combustion analysis was obtained by recrystallizations from *i*-PrOH as colorless needles (98% ee); mp 208.0–209.0 °C; Anal. Calcd for C<sub>18</sub>H<sub>15</sub>NO<sub>2</sub>: C, 77.96; H, 5.45; N, 5.05. Found: C, 77.96; H, 5.48; N, 5.00. In order to assign the stereochemistry at C2 and C6, NOE studies were performed on **5j**. Irradiation of C2–*H* showed NOE with C6–*H* (16.8%) and the *ortho* proton of the phenyl group (9.8%). Additionally, irradiation of C6–*H* exhibited NOE with C2–*H* (16.2%) and C5eq–*H* (4.6%). These data revealed *cis* relationship between C2–*H* and C6–*H*.

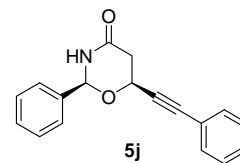

### Determination of absolute configuration of **5j**:

#### Methyl (*R*)-3-hydroxy-5-phenylpentanoate (**9p**).<sup>10</sup>

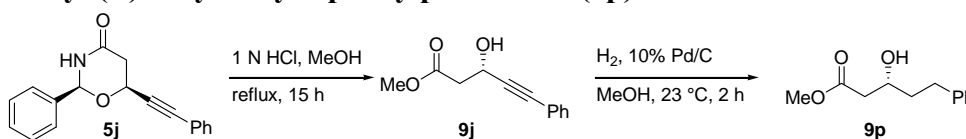

AcCl (0.14 mL, 2 mmol) was added to MeOH (1 mL). This solution was added to a solution of **5j** (36.0 mg, 0.13 mmol, 95% ee) in MeOH (1 mL) at 0 °C. After stirring at reflux temperature for 15 h, the reaction was quenched with saturated NaHCO<sub>3</sub> (2 mL), and the whole was extracted with EtOAc (20 mL). The organic layer was washed with water (3 mL) and brine (2 × 3 mL), and dried over anhydrous Na<sub>2</sub>SO<sub>4</sub>. The solvent was removed *in vacuo* to give the crude product (40 mg) as a white solid, which was purified by column chromatography (4:1 hexane/EtOAc) to afford **9j** (26.0 mg, 98%) as a colorless oil; TLC *R<sub>f</sub>* = 0.49 (2:1 hexane/EtOAc); [α]<sub>D</sub><sup>22</sup> +20.9 (*c* 0.90, CHCl<sub>3</sub>) for 95% ee; <sup>1</sup>H NMR (400 MHz, CDCl<sub>3</sub>) δ 2.87 (m, 2H, C2–*H*), 3.12 (d, *J* = 6.3 Hz, 1H, *OH*), 3.77 (s, 3H, OCH<sub>3</sub>), 5.00 (m, 1H, C3–*H*), 7.29–7.33 (m, 3H, *Ar*), 7.42–7.44 (m, 2H, *Ar*).

To a solution of **9j** in MeOH (2 mL) was added 10% Pd/C (10 mg), and the resulting mixture was stirred under hydrogen at atmospheric pressure at 23 °C for 2 h. The reaction mixture was then filtered through a plug of Celite, and the Celite filter cake was washed with MeOH (5 mL). The filtrate was concentrated *in vacuo*, and the residue was purified by column chromatography (silica gel, 4:1 hexane/EtOAc) to afford **9p** (25.2 mg, 97%) as a colorless oil; TLC  $R_f$  = 0.45 (2:1 hexane/EtOAc);  $[\alpha]_D^{22}$  +2.0 (*c* 1.01, CHCl<sub>3</sub>) for 95% ee [lit.,<sup>10</sup>  $[\alpha]_D$  -2.68 (*c* 0.67, CHCl<sub>3</sub>) for (*S*)-enantiomer]; <sup>1</sup>H NMR (400 MHz, CDCl<sub>3</sub>)  $\delta$  1.74 (m, 1H, C4-*H*), 1.80–1.90 (m, 2H, C4-*H*), 2.46 (dd, *J* = 8.6, 16.8 Hz, 1H, C2-*H*), 2.51 (dd, *J* = 3.6, 16.8 Hz, 1H, C2-*H*), 2.66–2.74 (m, 1H, C5-*H*), 2.79–2.86 (m, 1H, C5-*H*), 3.01 (br, 1H, OH), 3.71 (s, 3H, OCH<sub>3</sub>), 3.99–4.04 (m, 1H, C3-*H*), 7.17–7.22 (m, 2H, *Ar*), 7.26–7.31 (m, 2H, *Ar*), 7.37 (m, 1H, *Ar*). This product **9p** exhibited spectroscopic data identical to (*S*)-**9p**<sup>10</sup>, except for the sign of optical rotation. Thus, the preferred absolute stereochemistry of **5j** was determined to be (2*S*,6*S*).

#### (2*S*\*,6*S*\*)-6-(2-Heptynyl)-2-phenyl-1,3-oxazinan-4-one (**5k**)

According to the general procedure for asymmetric HDA reaction of 2-aza-3-silyloxydienes with aldehydes, **5k** was prepared from diene **2a** (78.4 mg, 0.30 mmol), 2-octynal (**3k**) (56.0 mg, 0.45 mmol), and Rh<sub>2</sub>(*S*-BPTPI)<sub>4</sub>·3H<sub>2</sub>O (**1**) (4.3 mg, 0.003 mmol, 1 mol %) at 0 °C. The crude product was purified by column chromatography (silica gel, 2:1 hexane/EtOAc) to provide **5k** (76.5 mg, 94%) as a white solid; mp 138.0–139.0 °C; TLC  $R_f$  = 0.52 (1:3 hexane/EtOAc);  $[\alpha]_D^{22}$  -34.8 (*c* 1.06, CHCl<sub>3</sub>) for 96% ee; IR (KBr) 2251, 1677 cm<sup>-1</sup>; <sup>1</sup>H NMR (400 MHz, CDCl<sub>3</sub>)  $\delta$  0.81 (t, *J* = 7.2 Hz, 3H, CH<sub>2</sub>CH<sub>3</sub>), 1.19–1.29 (m, 4H, CH<sub>2</sub>CH<sub>2</sub>CH<sub>3</sub>), 1.38–1.45 (m, 2H, C≡CCH<sub>2</sub>CH<sub>2</sub>), 2.11 (m, 2H, C≡CCH<sub>2</sub>), 2.49 (dd, *J* = 2.3, 17.1 Hz, 1H, C5-*H*), 2.59 (dd, *J* = 11.3, 17.1 Hz, 1H, C5-*H*), 4.56 (dd, *J* = 2.2, 11.3 Hz, 1H, C6-*H*), 5.59 (s, 1H, C2-*H*), 7.27–7.36 (m, 6H, NH and *Ar*); <sup>13</sup>C NMR (100 MHz, CDCl<sub>3</sub>)  $\delta$  13.8 (CH<sub>3</sub>), 18.5 (CH<sub>2</sub>), 22.0 (CH<sub>2</sub>), 27.8 (CH<sub>2</sub>), 30.8 (CH<sub>2</sub>), 38.1 (CH<sub>2</sub>), 65.4 (CH), 76.5 (C), 85.2 (CH), 88.2 (C), 126.9 (CH), 128.6 (CH), 129.8 (CH), 137.1 (C) 168.3 (C=O); EI-HRMS calcd for C<sub>17</sub>H<sub>20</sub>NO<sub>2</sub> (M-H)<sup>+</sup> 270.14940, found 270.14975. The enantiomeric excess of **5k** was determined to be 96% by HPLC with a Chiralpak AD-H column (19:1 hexane/*i*-PrOH, 1.0 mL/min): *t*<sub>R</sub> = 21.1 min for minor enantiomer; *t*<sub>R</sub> = 30.4 min for major enantiomer. The preferred absolute configuration of **5k** was not determined. A sample for combustion analysis was obtained by recrystallizations from *i*-PrOH as colorless needles (98% ee); mp 139.0–139.5 °C; Anal. Calcd for C<sub>17</sub>H<sub>21</sub>NO<sub>2</sub>: C, 75.25; H, 7.80; N, 5.16. Found: C, 74.90; H, 7.59; N, 5.22.

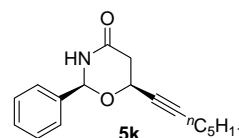

#### (2*S*,6*S*)-6-Benzoyloxymethyl-2-phenyl-1,3-oxazinan-4-one (**5l**).

According to the general procedure for asymmetric HDA reaction of 2-aza-3-silyloxydienes with aldehydes, **5l** was prepared from diene **2a** (78.4 mg, 0.30 mmol), benzyloxyacetaldehyde (**3l**) (67.8 mg, 0.45 mmol), and Rh<sub>2</sub>(*S*-BPTPI)<sub>4</sub>·3H<sub>2</sub>O (**1**) (4.3 mg, 0.003 mmol, 1 mol %) at 0 °C. The crude

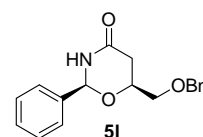

product was purified by column chromatography (silica gel, 9:1 CHCl<sub>3</sub>/EtOAc) to provide **5l** (65.7 mg, 86%) as a white solid; mp 69.0–70.0 °C; TLC  $R_f$  = 0.23 (1:1 CHCl<sub>3</sub>/EtOAc);  $[\alpha]_D^{19}$  –19.6 ( $c$  1.18, CHCl<sub>3</sub>) for 97% ee; IR (KBr) 3256, 1668, 1642 cm<sup>–1</sup>; <sup>1</sup>H NMR (400 MHz, CDCl<sub>3</sub>)  $\delta$  2.48 (dd,  $J$  = 4.1, 17.4 Hz, 1H, C5–H), 2.56 (dd,  $J$  = 11.0, 17.4 Hz, 1H, C5–H), 3.57 (dd,  $J$  = 4.1, 10.5 Hz, 1H, CHCHHO), 3.65 (dd,  $J$  = 5.9, 10.5 Hz, 1H, CHCHHO), 4.22 (m, 1H, C6–H), 4.55 (d,  $J$  = 12.4 Hz, 1H, OCHHPh), 4.59 (d,  $J$  = 12.4 Hz, 1H, OCHHPh), 5.76 (s, 1H, C2–H), 6.19 (br, 1H, NH), 7.28–7.47 (m, 10H, *Ar*); <sup>13</sup>C NMR (100 MHz, CDCl<sub>3</sub>)  $\delta$  33.8 (CH<sub>2</sub>), 71.6 (CH<sub>2</sub>), 73.4 (CH<sub>2</sub>), 74.2 (CH), 85.4 (CH), 126.8 (CH), 127.69 (CH), 127.74 (CH), 128.4 (CH), 128.8 (CH), 129.8 (CH), 137.5 (C), 137.6 (C), 168.9 (C=O); EI-HRMS calcd for C<sub>18</sub>H<sub>18</sub>NO<sub>3</sub> (M–H)<sup>+</sup> 296.1287, found 296.1272. The enantiomeric excess of **5l** was determined to be 97% by HPLC with a Chiralcel OD-H column (3:1 hexane/*i*-PrOH, 1.0 mL/min):  $t_R$  (minor) = 14.9 min for (2*R*,6*R*)-enantiomer;  $t_R$  (major) = 21.4 min for (2*S*,6*S*)-enantiomer. A sample for combustion analysis was obtained by recrystallizations from *i*-PrOH as colorless needles (92% ee); mp 70.5–71.5 °C; Anal. Calcd for C<sub>18</sub>H<sub>19</sub>NO<sub>3</sub>: C, 72.71; H, 6.44; N, 4.71. Found: C, 72.58; H, 6.36; N, 4.70.

### Determination of absolute configuration of **5l**:

#### Methyl (*S*)-4-benzyloxy-3-hydroxybutyrate (**9l**).<sup>7</sup>

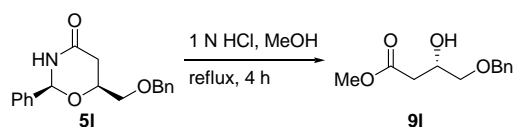

According to the procedure for the preparation of **9a**, **9l** was prepared from **5l** (49.8 mg, 0.17 mmol, 97% ee), AcCl (0.14 mL, 2 mmol) and MeOH (2 mL). The crude product was purified by column chromatography (silica gel, 4:1 hexane/EtOAc) to provide **9l** (30.3 mg, 81%) as a colorless oil; TLC  $R_f$  = 0.40 (1:1 hexane/EtOAc);  $[\alpha]_D^{19}$  –11.0 ( $c$  1.51, CHCl<sub>3</sub>) for 97% ee [lit., <sup>7</sup>  $[\alpha]_D^{20}$  –9.49 ( $c$  1.00, CHCl<sub>3</sub>) for 86% ee]; <sup>1</sup>H NMR (400 MHz, CDCl<sub>3</sub>)  $\delta$  2.56 (d,  $J$  = 6.3 Hz, 2H, C2–H), 2.95 (br, 1H, OH), 3.50 (ddd,  $J$  = 5.9, 9.5, 15.4 Hz, 2H, C4–H), 3.70 (s, 3H, OCH<sub>3</sub>), 4.25 (m, 1H, C3–H), 4.56 (s, 2H, PhCH<sub>2</sub>O), 7.28–7.38 (m, 5H, *Ar*). This product **9l** exhibited spectroscopic data identical to (*S*)-**9l**<sup>7</sup>. Thus, the preferred absolute stereochemistry of **5l** was determined to be (2*S*,6*S*).

#### (2*S*\*,6*S*\*)-6-Furyl-2-phenyl-1,3-oxazinan-4-one (**5m**).

According to the general procedure for asymmetric HDA reaction of 2-aza-3-silyloxydienes with aldehydes, **5m** was prepared from diene **2a** (78.4 mg, 0.30 mmol), furfural (**3m**) (43.2 mg, 0.45 mmol), and Rh<sub>2</sub>(*S*-BPTPI)<sub>4</sub>·3H<sub>2</sub>O (**1**) (4.30 mg, 0.003 mmol, 1 mol %). The crude product was purified by column chromatography (silica gel, 9:1 CHCl<sub>3</sub>/EtOAc) to provide **5m** (67.8 mg, 93%) as a white solid; mp 177.0–178.5 °C; TLC  $R_f$  = 0.51 (1:1 CHCl<sub>3</sub>/EtOAc);  $[\alpha]_D^{21}$  +6.57 ( $c$  1.09, CHCl<sub>3</sub>) for 95% ee; IR (KBr) 3176, 2923, 1672, 1396 cm<sup>–1</sup>; <sup>1</sup>H NMR (400 MHz, CDCl<sub>3</sub>)  $\delta$  2.73 (dd,  $J$  = 3.6, 17.2 Hz, 1H, C5–H), 3.09 (dd,  $J$  = 11.8, 17.2 Hz, 1H,

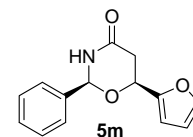

C5-*H*), 5.08 (dd,  $J = 3.6, 11.8$  Hz, 1H, C6-*H*), 5.92 (s, 1H, C2-*H*), 6.27 (br, 1H, *NH*), 6.37–6.43 (m, 2H, *Ar*), 7.40–7.50 (m, 6H, *Ar*);  $^{13}\text{C}$  NMR (100 MHz,  $\text{CDCl}_3$ )  $\delta$  35.0 ( $\text{CH}_2$ ), 70.0 (CH), 85.7 (CH), 108.6 (CH), 110.4 (CH), 127.0 (CH), 128.9 (CH), 130.1 (CH), 137.3 (C), 143.2 (CH), 151.3 (C), 168.5 (C=O); EI-HRMS calcd for  $\text{C}_{14}\text{H}_{12}\text{NO}_3$  ( $\text{M}-\text{H}$ ) $^+$  242.0895, found 242.0819. The enantiomeric excess of **5m** was determined to be 95% by HPLC with a Chiralpak AD-H column (9:1 hexane/*i*-PrOH, 1.0 mL/min):  $t_{\text{R}} = 32.9$  min for minor enantiomer;  $t_{\text{R}} = 37.9$  min for major enantiomer. The preferred absolute configuration of **5m** was not determined.

#### (2*S*\*,6*S*\*)-2-Phenyl-6-(2-thienyl)-1,3-oxazinan-4-one (**5n**).

According to the general procedure for asymmetric HDA reaction of 2-aza-3-silyloxydienes with aldehydes, **5n** was prepared from diene **2a** (78.4 mg, 0.30 mmol), 2-thiophencarbaldehyde (**3n**) (50.5 mg, 0.45 mmol), and  $\text{Rh}_2(\text{S-BPTPI})_4 \cdot 3\text{H}_2\text{O}$  (**1**) (4.30 mg, 0.003 mmol, 1 mol %). The crude product was purified by column chromatography (silica gel, 9:1  $\text{CHCl}_3/\text{EtOAc}$ ) to provide **5n** (63.1 mg, 81%) as a white solid; mp 159.0–160.0 °C; TLC  $R_f = 0.51$  (1:1  $\text{CHCl}_3/\text{EtOAc}$ );  $[\alpha]_{\text{D}}^{21} +10.3$  ( $c$  1.03,  $\text{CHCl}_3$ ) for 96% ee; IR (KBr) 3170, 2921, 1662, 1354  $\text{cm}^{-1}$ ;  $^1\text{H}$  NMR (400 MHz,  $\text{CDCl}_3$ )  $\delta$  2.88 (dd,  $J = 4.1, 17.2$  Hz, 1H, C5-*H*), 2.97 (dd,  $J = 11.3, 17.2$  Hz, 1H, C5-*H*), 5.28 (dd,  $J = 4.1, 11.3$  Hz, 1H, C6-*H*), 5.94 (s, 1H, C2-*H*), 6.24 (br, 1H, *NH*), 6.99–7.09 (m, 2H, *Ar*), 7.31–7.52 (m, 6H, *Ar*);  $^{13}\text{C}$  NMR (100 MHz,  $\text{CDCl}_3$ )  $\delta$  38.9 ( $\text{CH}_2$ ), 72.7 (CH), 85.7 (CH), 125.0 (CH), 126.0 (CH), 126.8 (CH), 126.9 (CH), 128.9 (CH), 130.1 (C), 137.4 (CH), 142.2 (C), 168.2 (C=O); EI-HRMS calcd for  $\text{C}_{14}\text{H}_{12}\text{NO}_2\text{S}$  ( $\text{M}-\text{H}$ ) $^+$  258.0667, found 258.0587. The enantiomeric excess of **5n** was determined to be 96% by HPLC with a Chiralpak AD-H column (9:1 hexane/*i*-PrOH, 1.0 mL/min):  $t_{\text{R}} = 22.3$  min for minor enantiomer;  $t_{\text{R}} = 24.4$  min for major enantiomer. The preferred absolute configuration of **5n** was not determined.

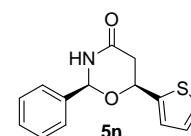

#### (2*S*,6*S*)-2-Phenyl-6-[(*E*)-2-phenylethenyl]-1,3-oxazinan-4-one (**5o**)

According to the general procedure for asymmetric HDA reaction of 2-aza-3-silyloxydienes with aldehydes, **5o** was prepared from diene **2a** (78.4 mg, 0.30 mmol), (*E*)-cinnamaldehyde (**3o**) (59.4 mg, 0.45 mmol), and  $\text{Rh}_2(\text{S-BPTPI})_4 \cdot 3\text{H}_2\text{O}$  (**1**) (4.3 mg, 0.003 mmol, 1 mol %). The crude product was purified by column chromatography (silica gel, 9:1  $\text{CHCl}_3/\text{EtOAc}$ ) to provide **5o** (73.7 mg, 88%) as a white solid; mp 138.0–139.5 °C; TLC  $R_f = 0.31$  (1:1  $\text{CHCl}_3/\text{EtOAc}$ );  $[\alpha]_{\text{D}}^{22} -21.2$  ( $c$  1.17,  $\text{CHCl}_3$ ) for 96% ee; IR (KBr) 3179, 1670  $\text{cm}^{-1}$ ;  $^1\text{H}$  NMR (400 MHz,  $\text{CDCl}_3$ )  $\delta$  2.66–2.68 (m, 2H, C5-*H*), 4.67 (m, 1H, C6-*H*), 5.86 (s, 1H, C2-*H*), 6.19 (br, 1H, *NH*), 6.26 (dd,  $J = 6.3, 15.9$  Hz, 1H,  $\text{CH}=\text{CHPh}$ ), 6.68 (d,  $J = 15.9$  Hz, 1H,  $\text{CH}=\text{CHPh}$ ), 7.24–7.28 (m, 1H, *Ar*), 7.30–7.34 (m, 2H, *Ar*), 7.38–7.40 (m, 2H, *Ar*), 7.43–7.45 (m, 3H, *Ar*), 7.49–7.52 (m, 2H, *Ar*);  $^{13}\text{C}$  NMR (100 MHz,  $\text{CDCl}_3$ )  $\delta$  37.2 ( $\text{CH}_2$ ), 75.2 (CH), 85.3 (CH),

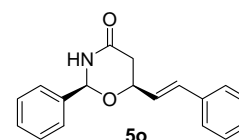



126.5 (CH), 126.8 (CH), 126.9 (CH), 128.1 (CH), 128.5 (CH), 128.7 (CH), 129.8 (CH), 132.2 (CH), 135.8 (C), 137.5 (C), 169.1 (C=O); EI-HRMS calcd for  $C_{18}H_{17}NO_2$  ( $M$ )<sup>+</sup> 279.1259, found 279.1255. The enantiomeric excess of **5o** was determined to be 96% by HPLC with a Chiralpak AD-H column (3:1 hexane/*i*-PrOH, 1.0 mL/min):  $t_R$  (minor) = 8.2 min for (2*R*,6*R*)-enantiomer;  $t_R$  (major) = 9.3 min for (2*S*,6*S*)-enantiomer. A sample for combustion analysis was obtained by recrystallizations from *i*-PrOH as colorless needles (99% ee); mp 138.5–139.5 °C; Anal. Calcd for  $C_{18}H_{17}NO_2$ : C, 77.40; H, 6.13; N, 5.01. Found: C, 76.42; H, 6.10; N, 5.05.

### Determination of absolute configuration of **5o**:

#### Methyl (*R*)-3-hydroxy-5-phenylpentanoate (**9p**).<sup>10</sup>

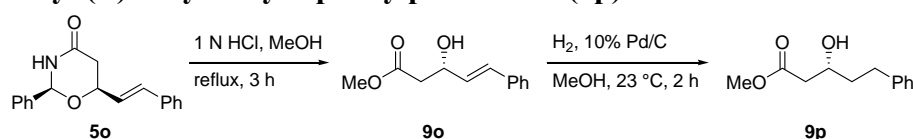

AcCl (0.14 mL, 2 mmol) was added to MeOH (1 mL). This solution was added to a solution of **5o** (40 mg, 0.13 mmol, 96% ee) in MeOH (1 mL) at 0 °C. After stirring at reflux temperature for 3 h, the reaction was quenched with saturated  $NaHCO_3$  (2 mL), and the whole was extracted with EtOAc (20 mL). The organic layer was washed with water (3 mL) and brine ( $2 \times 3$  mL), and dried over anhydrous  $Na_2SO_4$ . The solvent was removed *in vacuo* to give the crude product (40 mg) as yellow oil, which was purified by column chromatography (4:1 hexane/EtOAc) to afford **9o** (7.5 mg, 26%) as a colorless oil; TLC  $R_f$  = 0.24 (2:1 hexane/EtOAc);  $[\alpha]_D^{18}$   $-1.2$  ( $c$  0.38,  $CHCl_3$ ) for 96% ee;  $^1H$  NMR (400 MHz,  $CDCl_3$ )  $\delta$  2.56 (dd,  $J$  = 5.0, 15.0 Hz, 1H, C2-*H*), 2.71 (dd,  $J$  = 8.2, 15.0 Hz, 1H, C2-*H*), 3.70 (s, 3H,  $OCH_3$ ), 4.22 (ddd,  $J$  = 5.0, 7.7, 8.2, Hz, 1H, C3-*H*), 6.07 (dd,  $J$  = 7.7, 15.8 Hz, 1H, C4-*H*), 6.62 (d,  $J$  = 15.8 Hz, 1H, C5-*H*), 7.24–7.42 (m, 5H, *Ar*).

To a solution of **9o** in MeOH (2 mL) was added 10% Pd/C (10 mg), and the resulting mixture was stirred under hydrogen at atmospheric pressure at 23 °C for 2 h. The reaction mixture was then filtered through a plug of Celite, and the Celite filter cake was washed with MeOH (5 mL). The filtrate was concentrated *in vacuo*, and the residue was purified by column chromatography (silica gel, 4:1 hexane/EtOAc) to afford **9p** (7.4 mg, 97%) as a colorless oil;  $[\alpha]_D^{22}$   $+1.8$  ( $c$  0.37,  $CHCl_3$ ) for 96% ee [lit.,<sup>10</sup>  $[\alpha]_D$   $-2.68$  ( $c$  0.67,  $CHCl_3$ ) for (*S*)-enantiomer]. This product **9p** exhibited spectroscopic data identical to (*S*)-**9p**<sup>10</sup>, except for the sign of optical rotation. Thus, the preferred absolute stereochemistry of **5o** was determined to be (2*S*,6*S*).

#### (2*S*,6*R*)-2-Phenyl-6-(2-phenylethyl)-1,3-oxazinan-4-one (**5p**).

According to the general procedure for asymmetric HDA reaction of 2-aza-3-silyloxydienes with aldehydes, **5p** was prepared from diene **2a** (78.4 mg, 0.30 mmol), hydrocinnamaldehyde (**3p**) (60.3 mg, 0.45 mmol), and  $Rh_2(S\text{-BPTPI})_4 \cdot 3H_2O$  (**1**) (4.3 mg, 0.003 mmol, 1 mol %). The crude

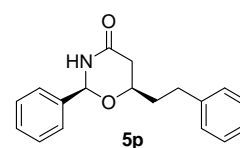



product was purified by column chromatography (silica gel, 9:1 CHCl<sub>3</sub>/EtOAc) to provide **5p** (80.0 mg, 95%) as a white solid; mp 128.0–129.5 °C; TLC  $R_f$  = 0.36 (1:1 CHCl<sub>3</sub>/EtOAc);  $[\alpha]_D^{22}$  +22.6 ( $c$  1.17, CHCl<sub>3</sub>) for 92% ee; IR (KBr) 3250, 1664, 1633 cm<sup>-1</sup>; <sup>1</sup>H NMR (400 MHz, CDCl<sub>3</sub>)  $\delta$  1.89 (m, 1H, CHHCH<sub>2</sub>Ph), 2.04 (m, 1H, CHHCH<sub>2</sub>Ph), 2.40–2.50 (m, 2H, C5–H), 2.70–2.85 (m, 2H, CH<sub>2</sub>CH<sub>2</sub>Ph), 3.90 (m, 1H, C6–H), 5.69 (s, 1H, C2–H), 6.20 (br, 1H, NH), 7.17–7.23 (m, 3H, *Ar*), 7.28–7.32 (m, 2H, *Ar*), 7.43–7.49 (m, 5H, *Ar*); <sup>13</sup>C NMR (100 MHz, CDCl<sub>3</sub>)  $\delta$  31.0 (CH<sub>2</sub>), 36.8 (CH<sub>2</sub>), 37.3 (CH<sub>2</sub>), 73.8 (CH), 85.4 (CH), 126.0 (CH), 126.7 (CH), 128.36 (CH), 128.42 (CH), 128.8 (CH), 129.7 (CH), 137.9 (C), 141.0 (C), 169.3 (C=O); EI-HRMS calcd for C<sub>18</sub>H<sub>19</sub>NO<sub>2</sub> (M)<sup>+</sup> 281.1416, found 281.1409. Anal. Calcd for C<sub>18</sub>H<sub>19</sub>NO<sub>2</sub>: C, 76.84; H, 6.81; N, 4.98. Found: C, 76.79; H, 6.86; N, 4.97. A sample for combustion analysis was obtained by recrystallizations from *i*-PrOH as colorless needles (95% ee); mp 128.5–129.5 °C; Anal. Calcd for C<sub>18</sub>H<sub>19</sub>NO<sub>2</sub>: C, 76.84; H, 6.81; N, 4.98. Found: C, 76.75; H, 6.83; N, 5.01.

### Determination of absolute configuration and enantiomeric excess of **5p**:

#### Methyl (*R*)-3-hydroxy-5-phenylpentanoate (**9p**).<sup>10</sup>

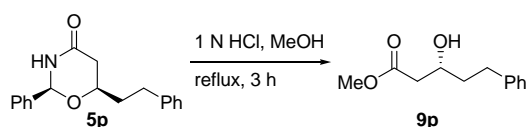

According to the procedure for the preparation of **9a**, **9p** was prepared from **5p** (40.0 mg, 0.14 mmol, 92% ee), AcCl (0.14 mL, 2 mmol) and MeOH (2 mL). The crude product was purified by column chromatography (silica gel, 4:1 hexane/EtOAc) to provide **9p** (23.6 mg, 83%) as a colorless oil;  $[\alpha]_D^{19}$  +1.9 ( $c$  1.09, CHCl<sub>3</sub>) for 92% ee [lit.,<sup>10</sup>  $[\alpha]_D$  –2.68 ( $c$  0.67, CHCl<sub>3</sub>) for (*S*)-enantiomer]. The enantiomeric excess of **9p** was determined to be 92% by HPLC with a Chiralcel OD-H column (19:1 hexane/*i*-PrOH, 1.0 mL/min):  $t_R$  (minor) = 19.2 min for (*S*)-enantiomer;  $t_R$  (major) = 21.4 min for (*R*)-enantiomer. This product **9p** exhibited spectroscopic data identical to (*S*)-**9p**<sup>10</sup>, except for the sign of optical rotation. Thus, the preferred absolute stereochemistry of **5p** was determined to be (2*S*,6*R*).

#### (2*S*\*,6*R*\*)-2-Phenyl-6-propyl-1,3-oxazinan-4-one (**5q**).

According to the general procedure for asymmetric HDA reaction of 2-aza-3-silyloxydienes with aldehydes, **5q** was prepared from diene **2a** (78.4 mg, 0.30 mmol), butyraldehyde (**3q**) (64.9 mg, 0.90 mmol), and Rh<sub>2</sub>(*S*-BPTPI)<sub>4</sub>·3H<sub>2</sub>O (**1**) (4.3 mg, 0.003 mmol, 1 mol %). The crude product was purified by column chromatography (silica gel, 9:1 CHCl<sub>3</sub>/EtOAc) to provide **5q** (60.2 mg, 92%) as a white solid; mp 92.0–93.0 °C; TLC  $R_f$  = 0.35 (1:1 CHCl<sub>3</sub>/EtOAc);  $[\alpha]_D^{22}$  –16.7 ( $c$  1.22, CHCl<sub>3</sub>) for 93% ee; IR (KBr) 3212, 1658, 1623 cm<sup>-1</sup>; <sup>1</sup>H NMR (400 MHz, CDCl<sub>3</sub>)  $\delta$  0.93 (t,  $J$  = 7.4 Hz, 3H, CH<sub>3</sub>), 1.37–1.58 (m, 3H, CHHCH<sub>2</sub>), 1.63–1.73 (m, 1H, CHHCH<sub>2</sub>), 2.32–2.44 (m, 2H, C5–H), 3.94 (m, 1H, C6–H), 5.72 (s, 1H, C2–H), 6.65 (br, 1H, NH), 7.36–7.46 (m, 5H, *Ar*); <sup>13</sup>C NMR (100 MHz, CDCl<sub>3</sub>)  $\delta$  13.7 (CH<sub>3</sub>), 18.0 (CH<sub>2</sub>), 37.2 (CH<sub>2</sub>),

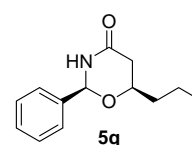

37.4 (CH<sub>2</sub>), 74.5 (CH), 85.1 (CH), 126.6 (CH), 128.5 (CH), 129.4 (CH), 137.9 (C), 169.6 (C=O); EI-HRMS calcd for C<sub>13</sub>H<sub>17</sub>NO<sub>2</sub> (M)<sup>+</sup> 219.1259, found 219.1267. The enantiomeric excess of **5q** was determined to be 93% by HPLC with a Chiralpak AD-H column (9:1 hexane/*i*-PrOH, 1.0 mL/min): *t*<sub>R</sub> = 9.2 min for minor enantiomer; *t*<sub>R</sub> = 11.1 min for major enantiomer. The preferred absolute configuration of **5q** was not determined. A sample for combustion analysis was obtained by recrystallizations from *i*-PrOH as colorless needles (93% ee); mp 93.0–94.0 °C; Anal. Calcd for C<sub>13</sub>H<sub>17</sub>NO<sub>2</sub>: C, 71.21; H, 7.81; N, 6.39. Found: C, 71.19; H, 7.86; N, 6.37.

**(2*S*\*,5*S*\*,6*S*\*)-5-Methyl-2-phenyl-6-phenylethynyl-1,3-oxazinan-4-one (5r).**

According to the general procedure for asymmetric HDA reaction of 2-aza-3-silyloxydienes with aldehydes, **5r** was prepared from diene **2d** (82.6 mg, 0.30 mmol), phenylpropargylaldehyde (**3j**) (58.6 mg, 0.45 mmol), and Rh<sub>2</sub>(*S*-BPTPI)<sub>4</sub>·3H<sub>2</sub>O (**1**) (4.3 mg, 0.003 mmol, 1 mol %) at 0 °C. The crude product was purified by column chromatography (silica gel, 9:1 CHCl<sub>3</sub>/EtOAc) to provide **5r** (82.9 mg, 95%) as a white solid; mp 173–175 °C; TLC *R*<sub>f</sub> = 0.26 (2:1 CHCl<sub>3</sub>/EtOAc); [α]<sub>D</sub><sup>21</sup> –15.5 (*c* 1.01, CHCl<sub>3</sub>) for 91% ee; IR (KBr) 2236, 1665 cm<sup>–1</sup>; <sup>1</sup>H NMR (400 MHz, CDCl<sub>3</sub>) δ 1.61 (d, *J* = 7.2 Hz, 3H, C5–CH<sub>3</sub>), 2.74 (dq, *J* = 3.2, 7.2 Hz, 1H, C5–H), 5.10 (d, *J* = 3.2 Hz, 1H, C6–H), 5.84 (s, 1H, C2–H), 6.08 (br, 1H, NH), 7.29–7.36 (m, 3H, *Ar*), 7.42–7.51 (m, 7H, *Ar*); <sup>13</sup>C NMR (100 MHz, CDCl<sub>3</sub>) δ 13.7 (CH<sub>3</sub>), 40.5 (CH), 69.4 (CH), 83.8 (C), 85.5 (CH), 88.3 (C), 121.8 (C), 127.0 (CH), 128.2 (CH), 128.8 (CH), 128.9 (CH), 130.0 (CH), 131.8 (CH), 137.3 (C), 172.5 (C=O); EI-HRMS calcd for C<sub>19</sub>H<sub>17</sub>NO<sub>2</sub> (M)<sup>+</sup> 291.1259, found 291.1259. The enantiomeric excess of **5r** was determined to be 91% by HPLC with a Chiralcel OD-H column (1:1 hexane/*i*-PrOH, 1.0 mL/min): *t*<sub>R</sub> = 7.2 min for minor enantiomer; *t*<sub>R</sub> = 13.9 min for major enantiomer. A sample for combustion analysis was obtained by recrystallizations from 4:1 hexane/EtOAc as colorless needles (96% ee); mp 184.0–185.0 °C; Anal. Calcd for C<sub>19</sub>H<sub>17</sub>NO<sub>2</sub>: C, 78.33; H, 5.88; N, 4.81. Found: C, 78.27; H, 5.97; N, 4.78. In order to assign the stereochemistry at C2, C5 and C6, NOE studies were performed on **5r**. Irradiation of C2–H showed NOE with C6–H (15.4%) and the *ortho* proton of the phenyl group (10.3%). Irradiation of C5–H exhibited NOE with C6–H (8.4%) and C5–Me (5.7%). Irradiation of C6–H showed NOE with C2–H (15.4%) and C5–H (8.6%). These data revealed *cis* relationship between C2–H, C5–H and C6–H. The preferred absolute configuration of **5r** was not determined.

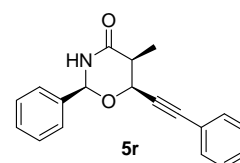

**(2*S*\*,5*S*\*,6*S*\*)-5-Methyl-2-phenyl-6-(1-heptenyl)-1,3-oxazinan-4-one (5s)**

According to the general procedure for asymmetric HDA reaction of 2-aza-3-silyloxydienes with aldehydes, **5s** was prepared from diene **2d** (82.6 mg, 0.30 mmol), 2-octynal (**3k**) (55.9 mg, 0.45 mmol), and Rh<sub>2</sub>(*S*-BPTPI)<sub>4</sub>·3H<sub>2</sub>O (**1**) (4.3 mg, 0.003 mmol, 1 mol %) at 0 °C. The crude product was purified by column chromatography (silica gel, 2:1 hexane/EtOAc) to

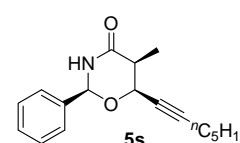

provide **5s** (76.2 mg, 89%) as a white solid; mp 109.5–110.5 °C; TLC  $R_f$  = 0.53 (1:3 hexane/EtOAc);  $[\alpha]_D^{20}$  –14.2 ( $c$  1.18, CHCl<sub>3</sub>) for 92% ee; IR (KBr) 2236, 1665 cm<sup>–1</sup>; <sup>1</sup>H NMR (400 MHz, CDCl<sub>3</sub>)  $\delta$  0.89 (t,  $J$  = 6.7 Hz, 3H, CH<sub>2</sub>CH<sub>3</sub>), 1.28–1.39 (m, 4H, CH<sub>2</sub>CH<sub>2</sub>CH<sub>2</sub>CH<sub>3</sub>), 1.50–1.54 (m, 5H, C5–CH<sub>3</sub> and C $\equiv$ CCH<sub>2</sub>CH<sub>2</sub>), 2.24 (dt,  $J$  = 1.8, 7.1 Hz, 2H, C $\equiv$ CCH<sub>2</sub>), 2.62 (dq,  $J$  = 3.5, 10.8 Hz, 1H, C5–H), 4.86 (dt,  $J$  = 1.8, 3.5 Hz, 1H, C6–H), 5.77 (s, 1H, C2–H), 5.85 (br, 1H, NH), 7.40–7.47 (m, 5H, Ar); <sup>13</sup>C NMR (100 MHz, CDCl<sub>3</sub>)  $\delta$  13.5 (CH<sub>3</sub>), 13.9 (CH<sub>3</sub>), 18.6 (CH<sub>2</sub>), 22.0 (CH<sub>2</sub>), 27.9 (CH<sub>2</sub>), 30.9 (CH<sub>2</sub>), 40.5 (CH), 69.0 (CH), 74.9 (C), 85.3 (CH), 89.6 (C), 126.9 (CH), 128.6 (CH), 129.8 (CH), 137.4 (C), 172.8 (C=O); EI-HRMS calcd for C<sub>18</sub>H<sub>22</sub>NO<sub>2</sub> (M–H)<sup>+</sup> 284.16505, found 284.16485; The enantiomeric excess of **5s** was determined to be 92% by HPLC with a Chiralcel OD-H column (9:1 hexane/*i*-PrOH, 1.0 mL/min):  $t_R$  = 10.3 min for minor enantiomer;  $t_R$  = 14.3 min for major enantiomer. The preferred absolute configuration of **5s** was not determined. A sample for combustion analysis was obtained by recrystallizations from 4:1 hexane/EtOAc as colorless needles (97% ee); mp 110.0–110.5 °C; Anal. Calcd for C<sub>18</sub>H<sub>23</sub>NO<sub>2</sub>: C, 75.76; H, 8.12; N, 4.91. Found: C, 75.56; H, 7.89; N, 4.93.

**(2R\*,5R\*,6R\*)-5-Methyl-2-phenyl-6-(1-propynyl)-1,3-oxazinan-4-one (5t)**

To a solution of diene **2d** (110 mg, 0.40 mmol) and Rh<sub>2</sub>(*R*-BPTPI)<sub>4</sub>·3H<sub>2</sub>O (**8**) (5.7 mg, 0.004 mmol, 1 mol %) in CH<sub>2</sub>Cl<sub>2</sub> (0.4 mL) was added *ca.* 1.5 M solution of 2-butyne (**3r**)<sup>11</sup> in CH<sub>2</sub>Cl<sub>2</sub> (0.4 mL) added at –10 °C. After stirring at this temperature for 24 h, MeOH (*ca.* 0.1 mL) was added and the mixture was stirred for an additional 0.5 h. The mixture was concentrated *in vacuo* furnished the crude product (150 mg) as a purple solid, which was purified by column chromatography (silica gel, 9:1 CHCl<sub>3</sub>/EtOAc) to give **5t** (83.5 mg, 91%) as a white solid; mp 196.0–197.5 °C; TLC  $R_f$  = 0.43 (1:1 CHCl<sub>3</sub>/EtOAc);  $[\alpha]_D^{17}$  +13.2 ( $c$  1.08, CHCl<sub>3</sub>) for 93% ee; IR (KBr) 3169, 1675, 1480 cm<sup>–1</sup>; <sup>1</sup>H NMR (400 MHz, CDCl<sub>3</sub>)  $\delta$  1.45 (d,  $J$  = 7.2 Hz, 3H, C5–CH<sub>3</sub>), 1.87 (d,  $J$  = 2.3 Hz, 3H, C $\equiv$ CCH<sub>3</sub>), 2.54 (m, 1H, C5–H), 4.80 (m, 1H, C6–H), 5.74 (s, 1H, C2–H), 6.64 (br, 1H, NH), 7.38–7.45 (m, 5H, Ar); <sup>13</sup>C NMR (100 MHz, CDCl<sub>3</sub>)  $\delta$  3.7 (CH<sub>3</sub>), 13.6 (CH<sub>3</sub>), 40.6 (CH), 69.2 (CH), 74.1 (C), 85.3 (C), 85.4 (CH), 128.0 (CH), 128.8 (CH), 130.0 (CH), 137.3 (C), 172.7 (C=O); EI-HRMS calcd for C<sub>14</sub>H<sub>14</sub>NO<sub>2</sub> (M–H)<sup>+</sup> 228.1103, found 228.1020. The enantiomeric excess of **5t** was determined to be 93% by HPLC with a Chiralpak AD-H column (9:1 hexane/*i*-PrOH, 1.0 mL/min):  $t_R$  = 11.0 min for major enantiomer;  $t_R$  = 20.3 min for minor enantiomer. The preferred absolute configuration of **5t** was not determined. A sample for combustion analysis was obtained by recrystallizations from *i*-PrOH as colorless needles (91% ee); mp 196.5–197.5 °C; Anal. Calcd for C<sub>14</sub>H<sub>15</sub>NO<sub>2</sub>: C, 73.34; H, 6.59; N, 6.11. Found: C, 73.57; H, 6.64; N, 6.15. In order to assign the stereochemistry at C2, C5 and C6, NOE studies were performed on **5t**. Irradiation of C2–H showed NOE with C6–H (9.1%) and the *ortho* proton of the phenyl group (4.2%). Irradiation of C5–H exhibited NOE with C6–H (5.2%) and C5–Me (4.6%). Irradiation of C6–H showed NOE with C2–H (6.6%) and C5–H (6.0%). These data revealed *cis* relationship between C2–H, C5–H and C6–H.

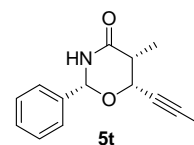

**(2*S*\*,3*S*\*)-3-Hydroxy-2-methyl-*N*-(2-propenyl)hexanamide (7).**

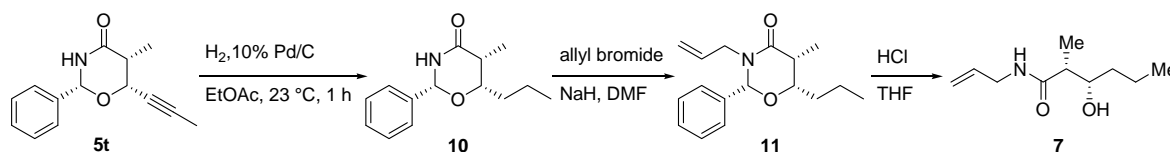

To a solution of **5t** (70.0 mg, 0.31 mmol) in EtOAc (2 mL) was added 10% Pd/C (35 mg), and the resulting mixture was stirred under hydrogen at atmospheric pressure at 23 °C for 1 h. The reaction mixture was then filtered through a plug of Celite, and the Celite filter cake was washed with EtOAc (5 mL). The filtrate was concentrated *in vacuo*, and the residue was purified by column chromatography (silica gel, 1:1 hexane/EtOAc) to afford **10** (65.4 mg, 94%) as a white solid; mp 78.5–80.0 °C; TLC  $R_f$  = 0.47 (1:3 hexane/EtOAc);  $[\alpha]_D^{19}$  +1.02 ( $c$  1.03, CHCl<sub>3</sub>) for 93% ee; <sup>1</sup>H NMR (400 MHz, CDCl<sub>3</sub>)  $\delta$  0.95 (t,  $J$  = 7.2 Hz, 3H, CH<sub>2</sub>H<sub>2</sub>CH<sub>3</sub>), 1.25–1.69 (m, 7H, CH<sub>2</sub>H<sub>2</sub>CH<sub>3</sub> and C5–CH<sub>3</sub>), 2.46 (m, 1H, C5–H), 3.99 (m, 1H, C6–H), 5.73 (s, 1H, C2–H), 6.06 (br, 1H, NH), 7.40–7.45 (m, 5H, Ar).

To a suspension of NaH (10.8 mg, 0.45 mol) in DMF (1 mL) was added a solution of **10** (64.0 mg, 0.27 mmol) and allyl bromide (54.4 mg, 0.45 mmol) at 0 °C. After stirring at 23 °C for 1 h, the reaction was quenched with saturated aqueous NH<sub>4</sub>Cl (1 mL), and the whole was extracted with EtOAc (20 mL). The organic layer was washed with water (3 mL) and brine (2  $\times$  3 mL), and dried over anhydrous Na<sub>2</sub>SO<sub>4</sub>. Filtration and evaporation *in vacuo* followed by column chromatography (silica gel, 3:1 hexane/EtOAc) provided **11** (70.8 mg, 96%) as a colorless oil; TLC  $R_f$  = 0.46 (2:1 hexane/EtOAc);  $[\alpha]_D^{21}$  –69.3 ( $c$  1.05, CHCl<sub>3</sub>) for 93% ee; <sup>1</sup>H NMR (400 MHz, CDCl<sub>3</sub>)  $\delta$  0.92 (t,  $J$  = 7.2 Hz, 3H, CH<sub>2</sub>H<sub>2</sub>CH<sub>3</sub>), 1.32–1.64 (m, 7H, CH<sub>2</sub>H<sub>2</sub>CH<sub>3</sub> and C5–CH<sub>3</sub>), 2.54 (ddd,  $J$  = 2.3, 7.2, 14.5 Hz, 1H, C5–H), 3.03 (ddt,  $J$  = 1.4, 7.2, 15.4 Hz, 1H, N–CHH), 3.94 (m, 1H, C6–H), 4.38 (ddt,  $J$  = 1.8, 4.5, 15.4 Hz, 1H, N–CHH), 4.88 (dd,  $J$  = 1.4, 17.2 Hz, 1H, NCH<sub>2</sub>CH=CHH), 5.04 (dd,  $J$  = 1.4, 10.3 Hz, 1H, NCH<sub>2</sub>CH=CHH), 5.61–5.63 (m, 2H, NCH<sub>2</sub>CH=CH<sub>2</sub> and C2–H), 7.35–7.41 (m, 5H, Ar).

To a solution of **11** (65.0 mg, 0.24 mmol) in THF (2 mL) was added a 2*N* aqueous HCl (1 mL). After stirring at 70 °C for 7 h, the reaction was quenched with saturated NaHCO<sub>3</sub> (2 mL), and the whole was extracted with EtOAc (20 mL). The organic layer was washed with water (3 mL) and brine (2  $\times$  3 mL), and dried over anhydrous Na<sub>2</sub>SO<sub>4</sub>. Filtration and evaporation *in vacuo* followed by column chromatography (silica gel, 9:1 CHCl<sub>3</sub>/EtOAc) provided **7** (40.4 mg, 91%) as a white solid; mp 120.0–121.5 °C; TLC  $R_f$  = 0.44 (1:1 CHCl<sub>3</sub>/EtOAc);  $[\alpha]_D^{18}$  –11.2 ( $c$  1.12, CHCl<sub>3</sub>) for 93% ee; IR (KBr) 3354, 1639, 1550 cm<sup>–1</sup>; <sup>1</sup>H NMR (400 MHz, CDCl<sub>3</sub>)  $\delta$  0.93 (t,  $J$  = 7.4 Hz, 3H, C5–H), 1.18 (d,  $J$  = 7.4 Hz, 3H, C2–CH<sub>3</sub>), 1.31–1.36 (m, 2H, C5–H), 1.47–1.52 (m, 2H, C5–H), 2.32 (ddd,  $J$  = 2.9, 7.4, 14.3 Hz, 1H, C2–H), 3.88–3.91 (m, 3H, C3–H and NCH<sub>2</sub>), 5.14–5.22 (m, 2H, NCH<sub>2</sub>CH=CH<sub>2</sub>), 5.85 (m, 1H, NCH<sub>2</sub>CH=CH<sub>2</sub>), 5.99 (br, 1H, OH); <sup>13</sup>C NMR (100 MHz, CDCl<sub>3</sub>)  $\delta$  6.4 (CH<sub>3</sub>), 11.2 (CH<sub>3</sub>), 19.1 (CH<sub>2</sub>), 35.6 (CH<sub>2</sub>), 41.5 (CH<sub>2</sub>), 44.5 (CH), 71.6 (CH), 116.2 (CH<sub>2</sub>), 134.0 (CH), 176.5 (C=O); EI-HRMS calcd for C<sub>10</sub>H<sub>19</sub>NO<sub>2</sub> (M)<sup>+</sup> 185.14158, found 185.14163. A sample for combustion analysis

was obtained by recrystallizations from 1:2 hexane/EtOAc as colorless needles; mp 120.5–121.5 °C; Anal. Calcd for C<sub>10</sub>H<sub>19</sub>NO<sub>2</sub>: C, 64.83; H, 10.34; N, 7.56. Found: C, 64.53; H, 10.30; N, 7.58.

## References

- 1) P. Bayard and L. Ghosez, *Tetrahedron Lett.*, 1988, **29**, 6115.
- 2) L. Ghosez, P. Bayard, V. Nshimymukiza, F. Gouverneur, R. Sainte, M. Beaudegnies, M. Rivera, A.-M. Frisque-Hesbain and C. Wynants, *Tetrahedron*, 1995, **51**, 11021.
- 3) E. W. Colvin, D. McGarry and M. J. Nugent, *Tetrahedron*, 1988, **44**, 4157.
- 4) F. Duboudin, E. Frainnet, G. Vincon and F. Dabescat, *J. Organomet. Chem.* 1974, **82**, 41.
- 5) M. Panunzio, E. Tamanini, E. Bandini, E. Campana, A. D'Aurizio and P. Vicennati, *Tetrahedron*, 2006, **62**, 12270.
- 6) C. Xu and C. Yuan, *Tetrahedron*, 2005, **61**, 2169.
- 7) T. Washio, S. Nakamura, M. Anada and S. Hashimoto, *Heterocycles*, 2005, **66**, 567.
- 8) J. H. Looker and C. H. Hayes, *J. Am. Chem. Soc.*, 1957, **79**, 745.
- 9) S. V. Raders and J. G. Verkade, *J. Org. Chem.*, 2009, **74**, 5417.
- 10) I. Obadalova, T. Pilarcik, M. Slavikova and J. Hajicek, *Chirality*, 2005, **17**, S109.
- 11) B. Carmer, H. Harrer, K. Nakamura, D. Uemura and H.-U. Humpf, *Bioorg. Med. Chem.*, 2010, **18**, 343.

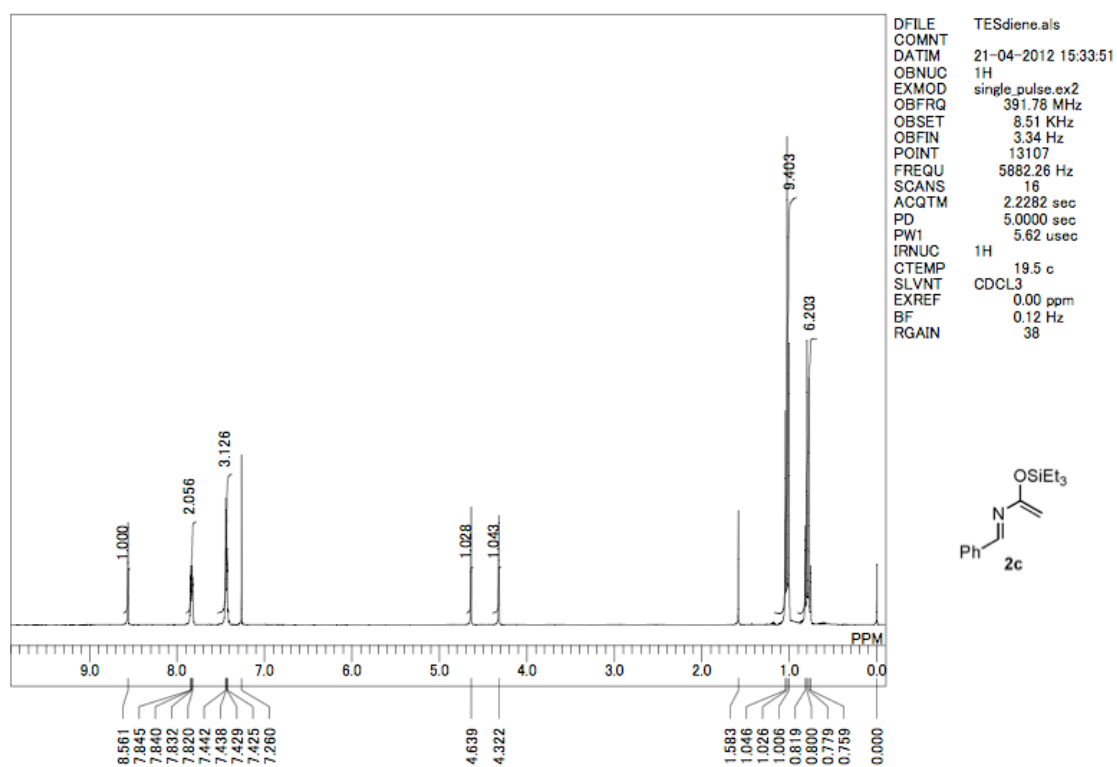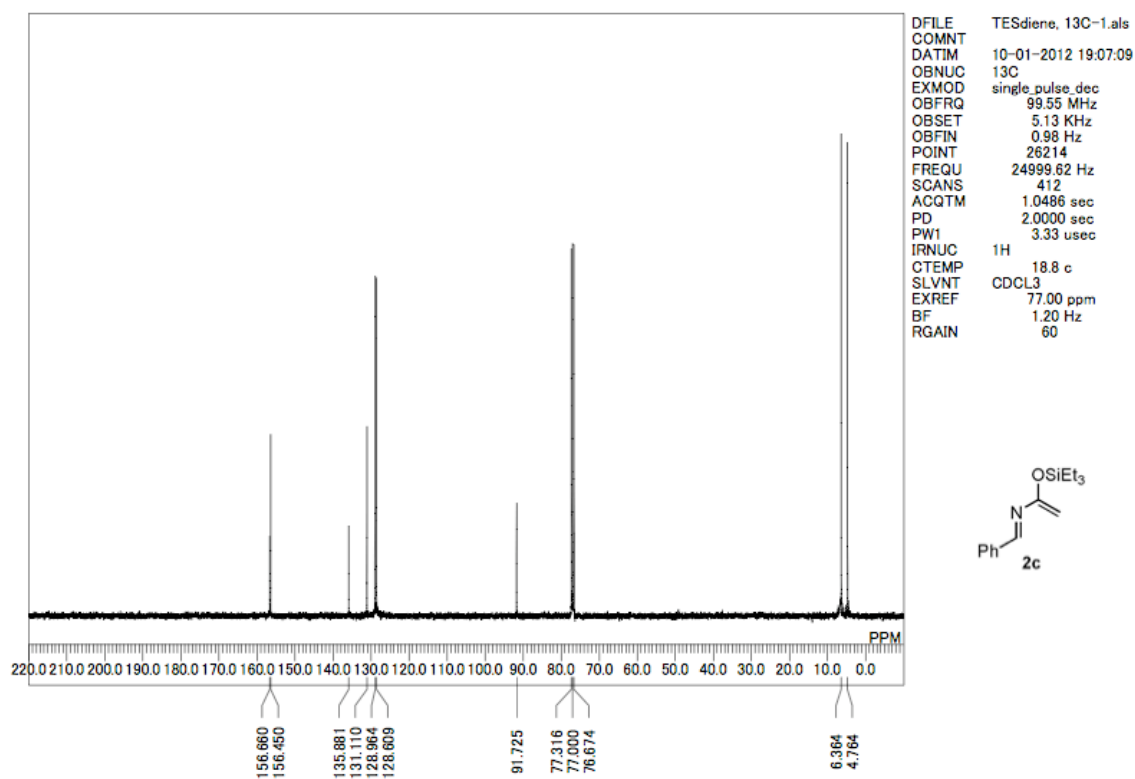



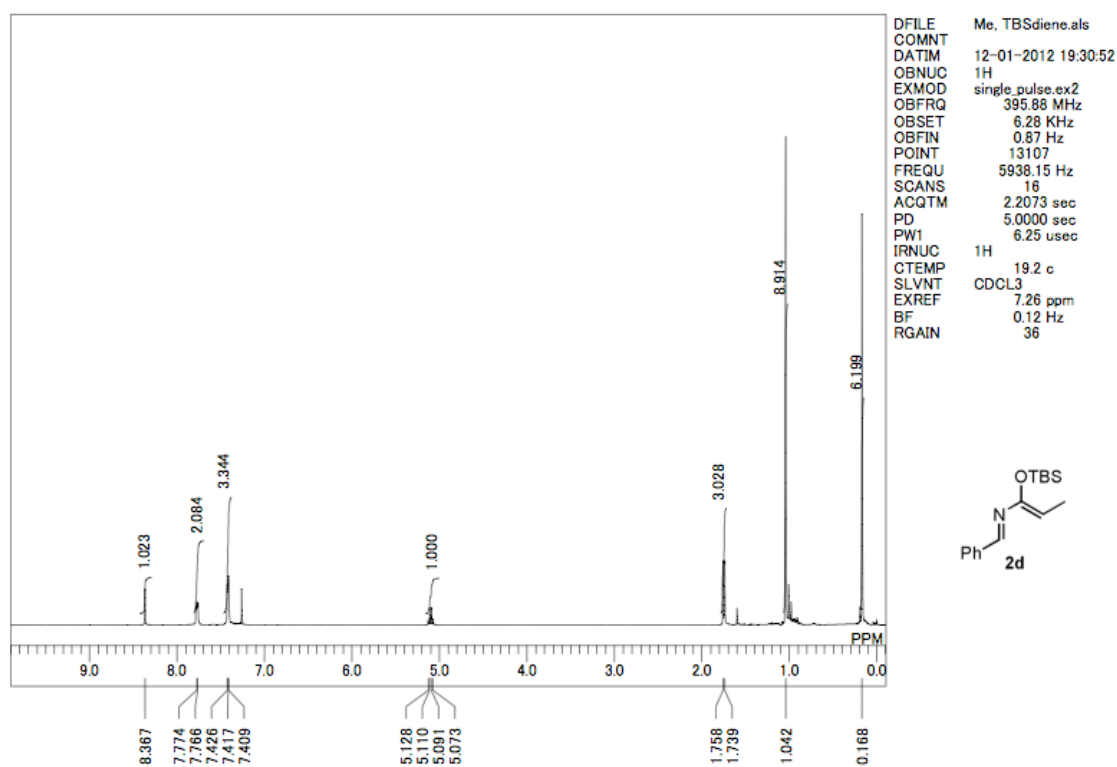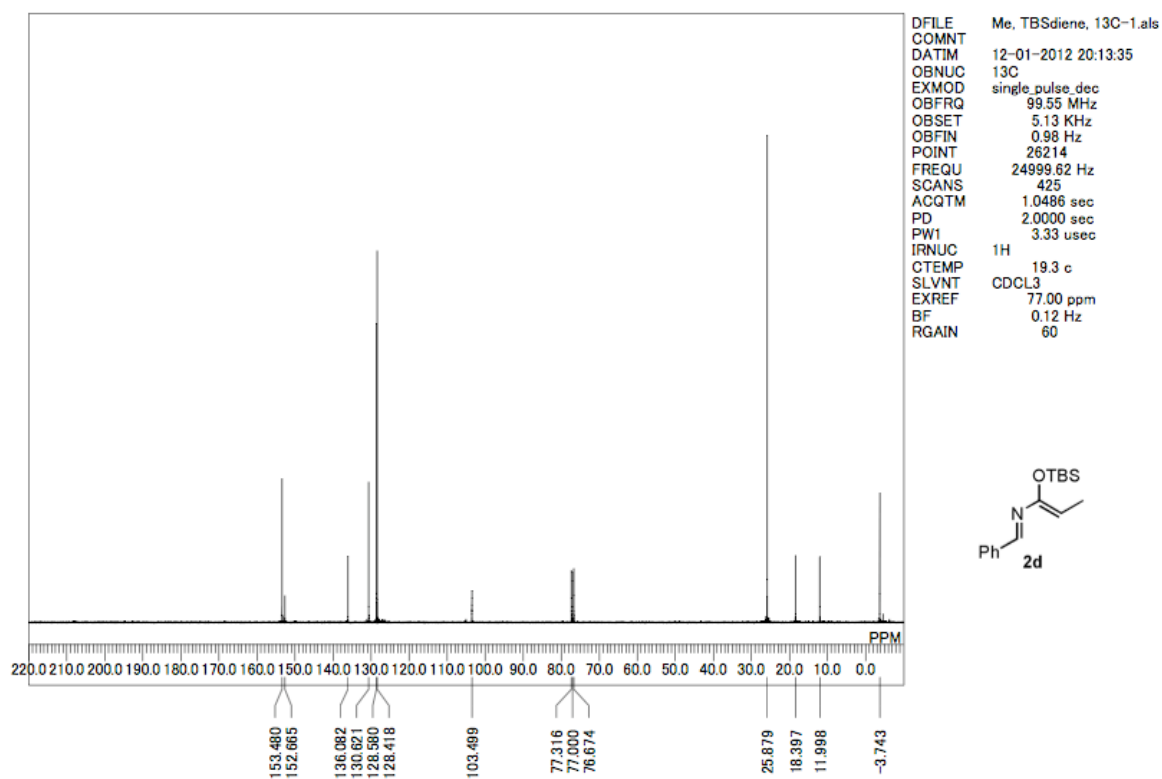

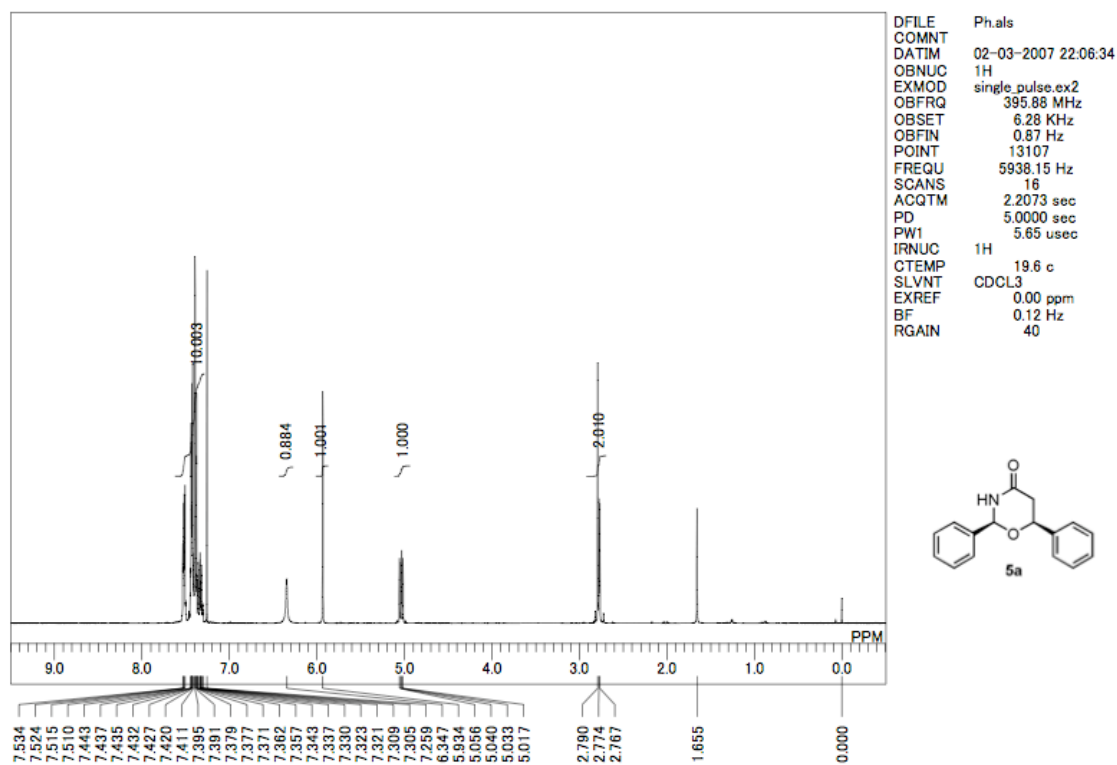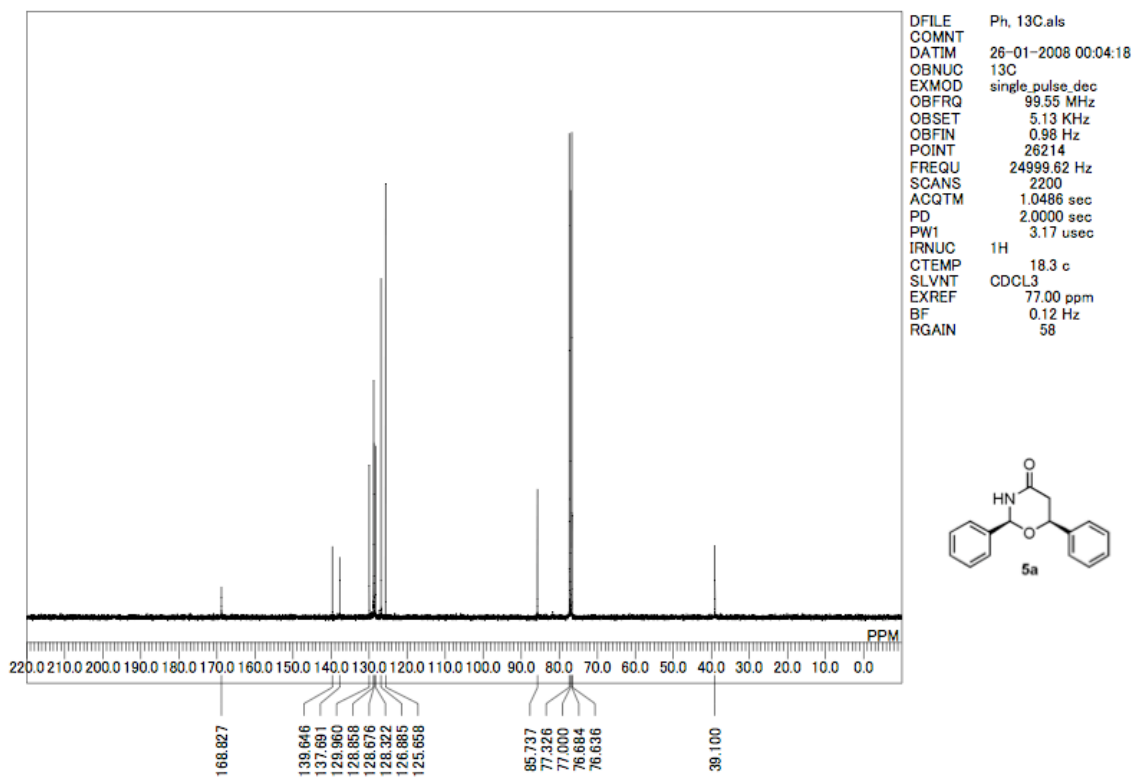

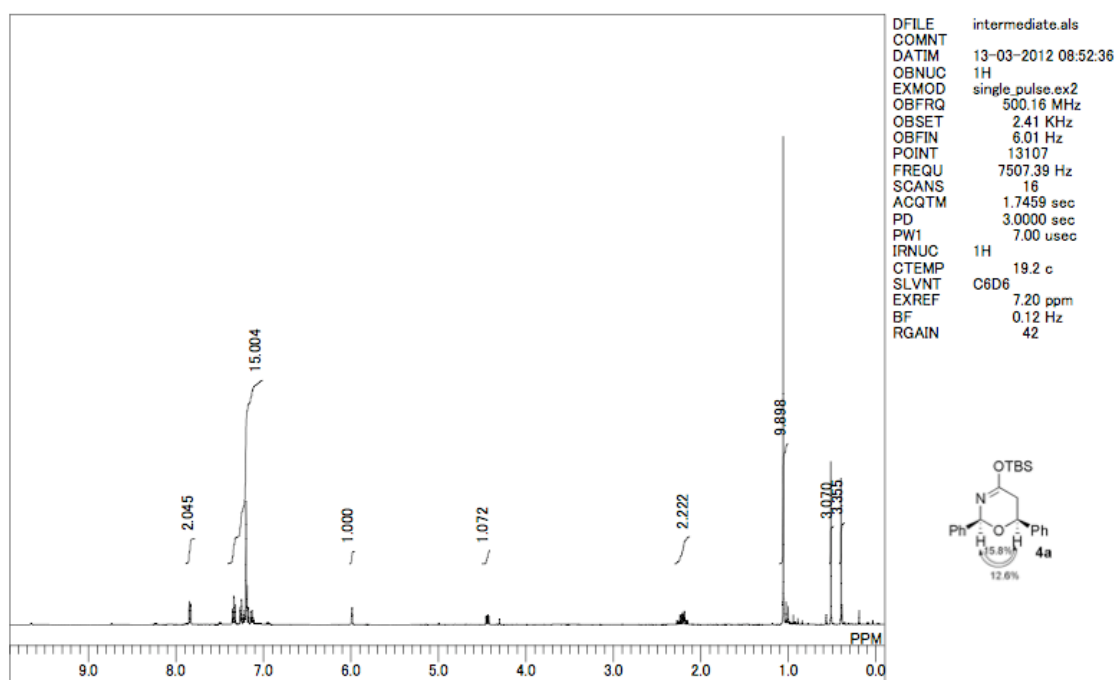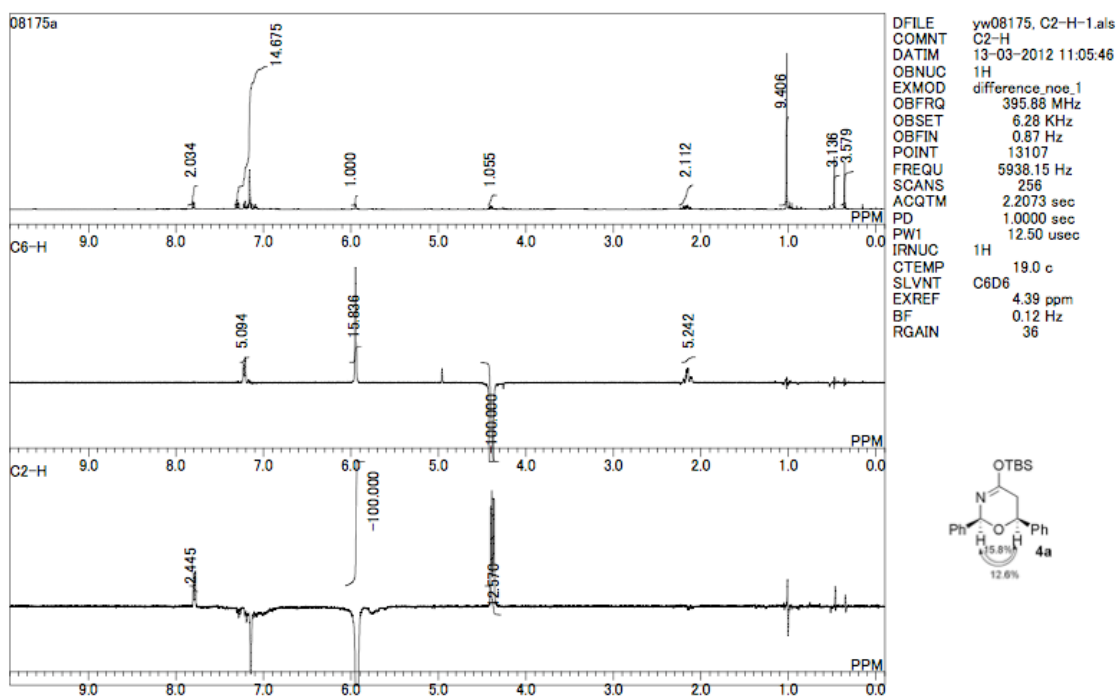

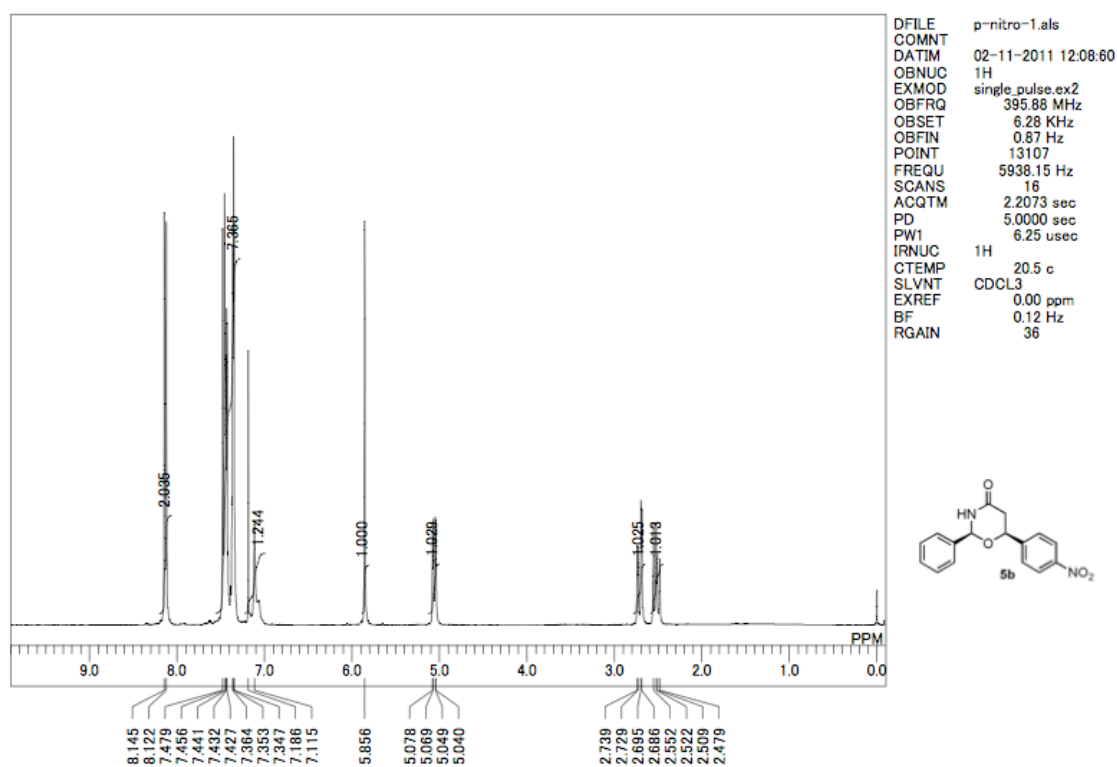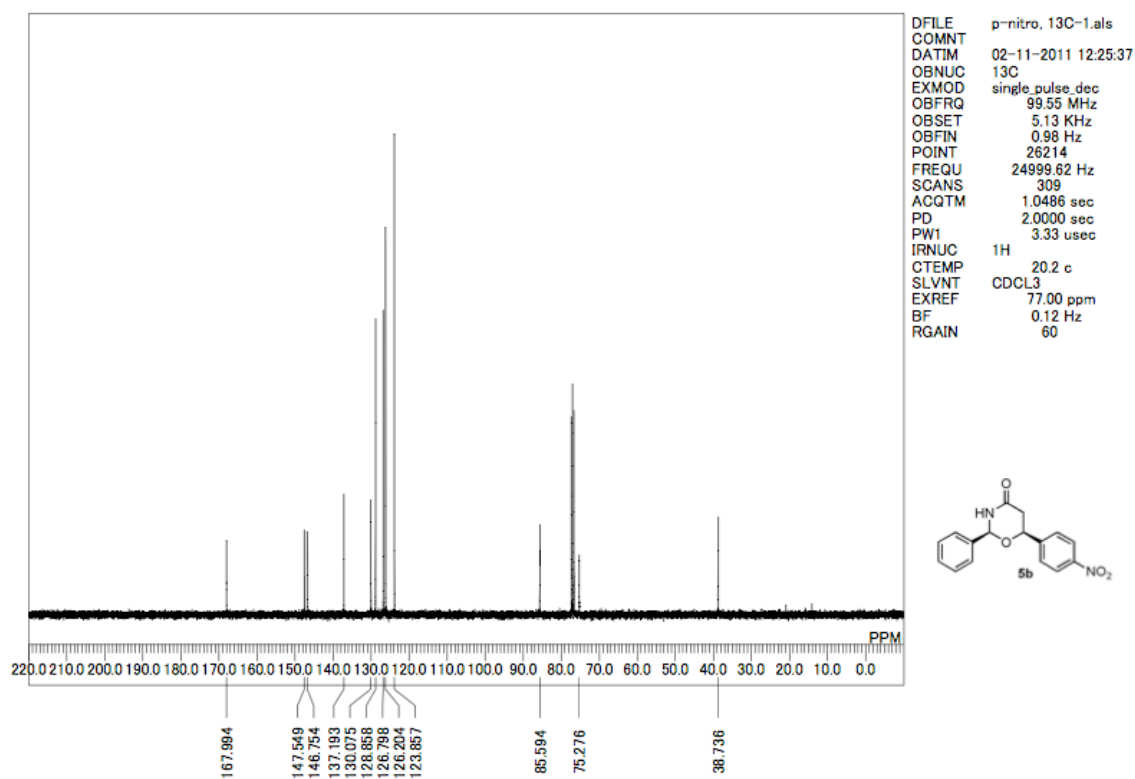

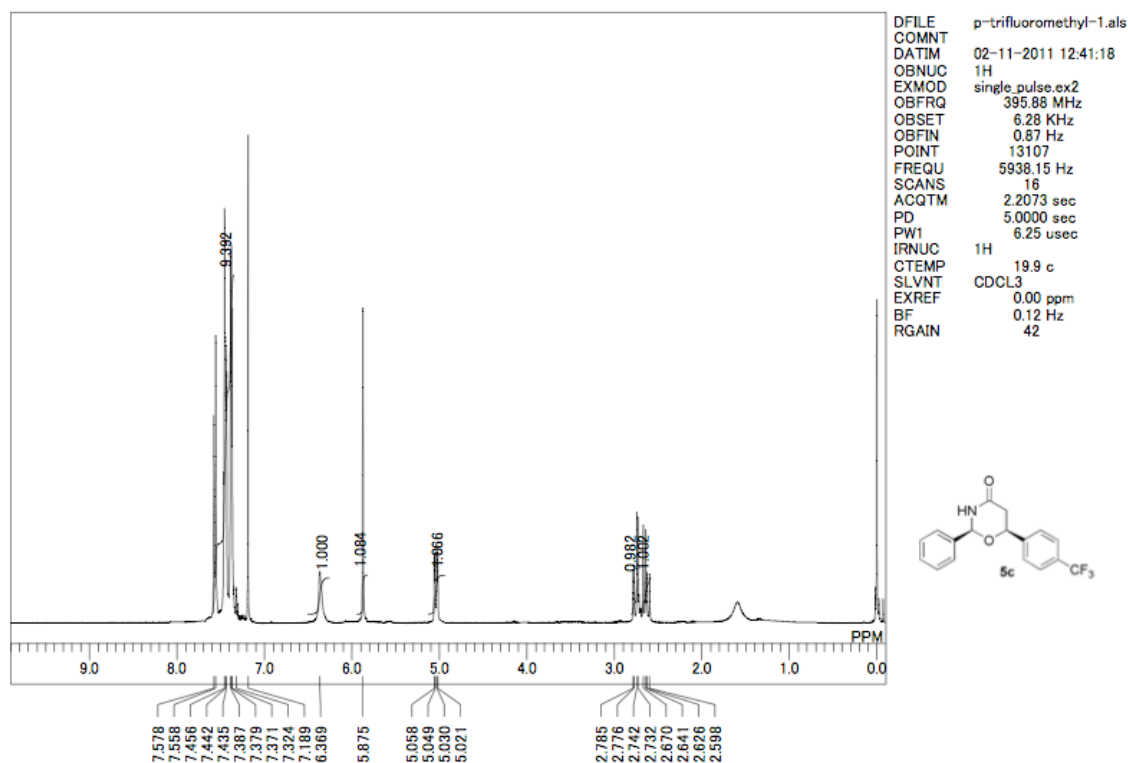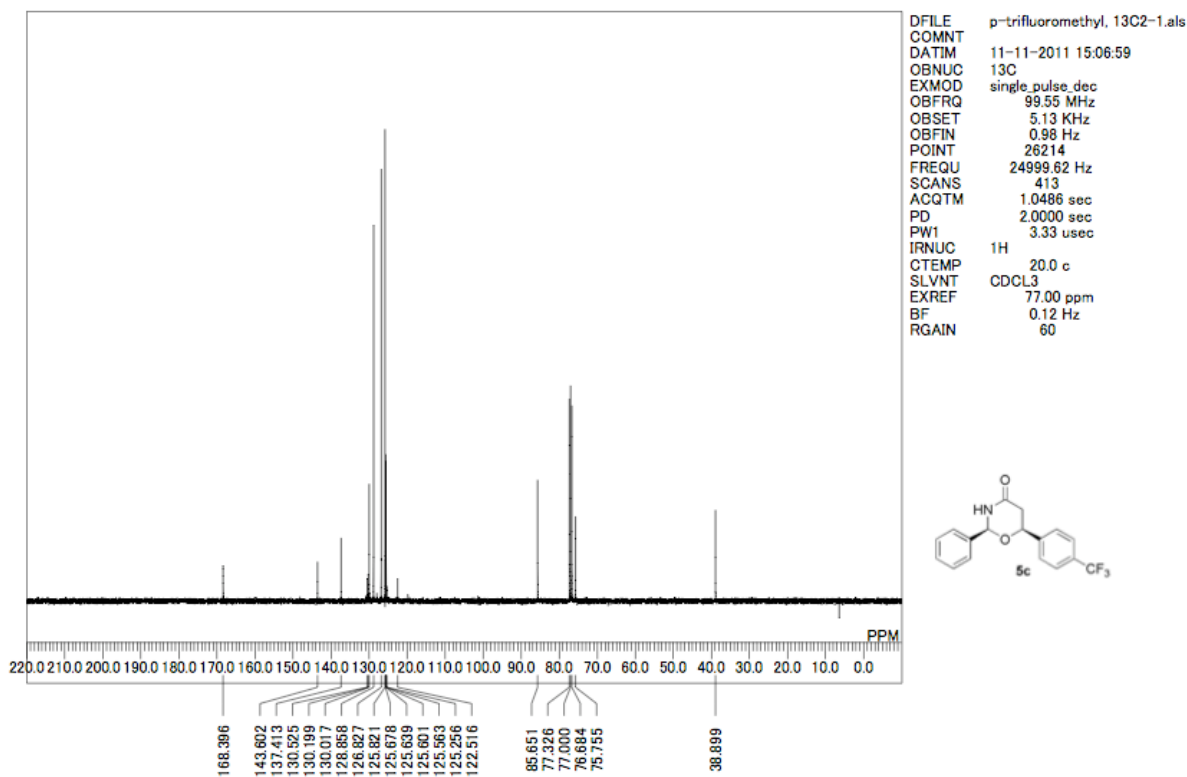

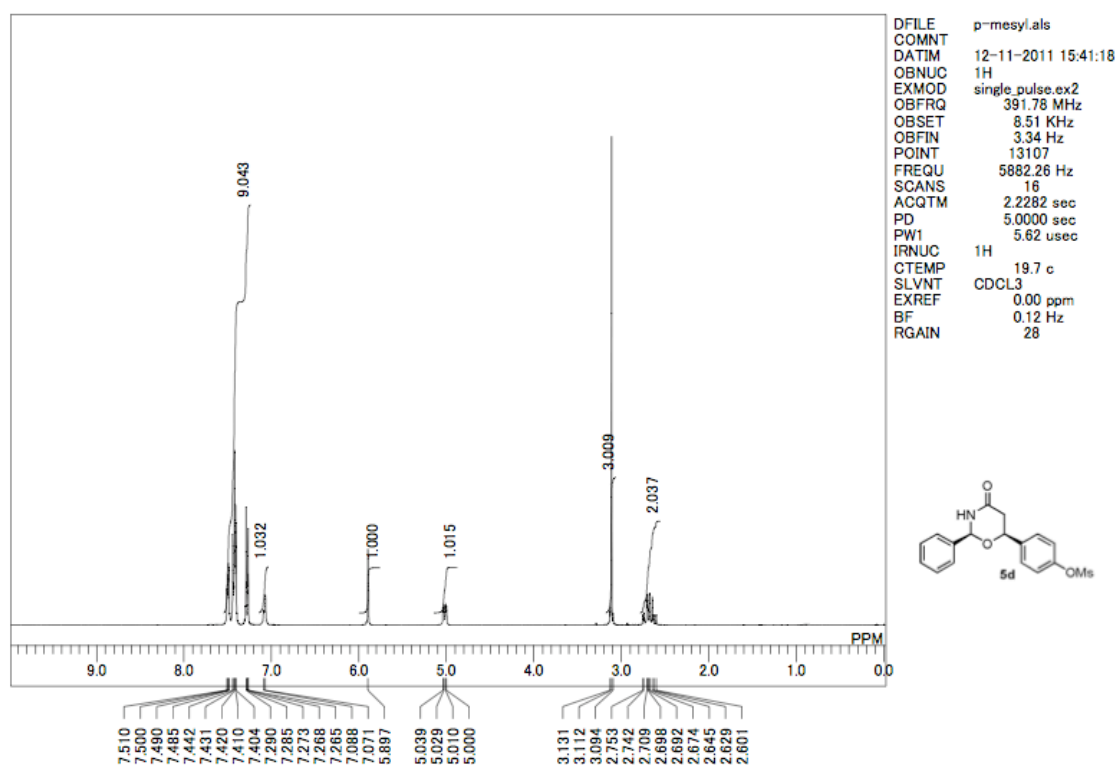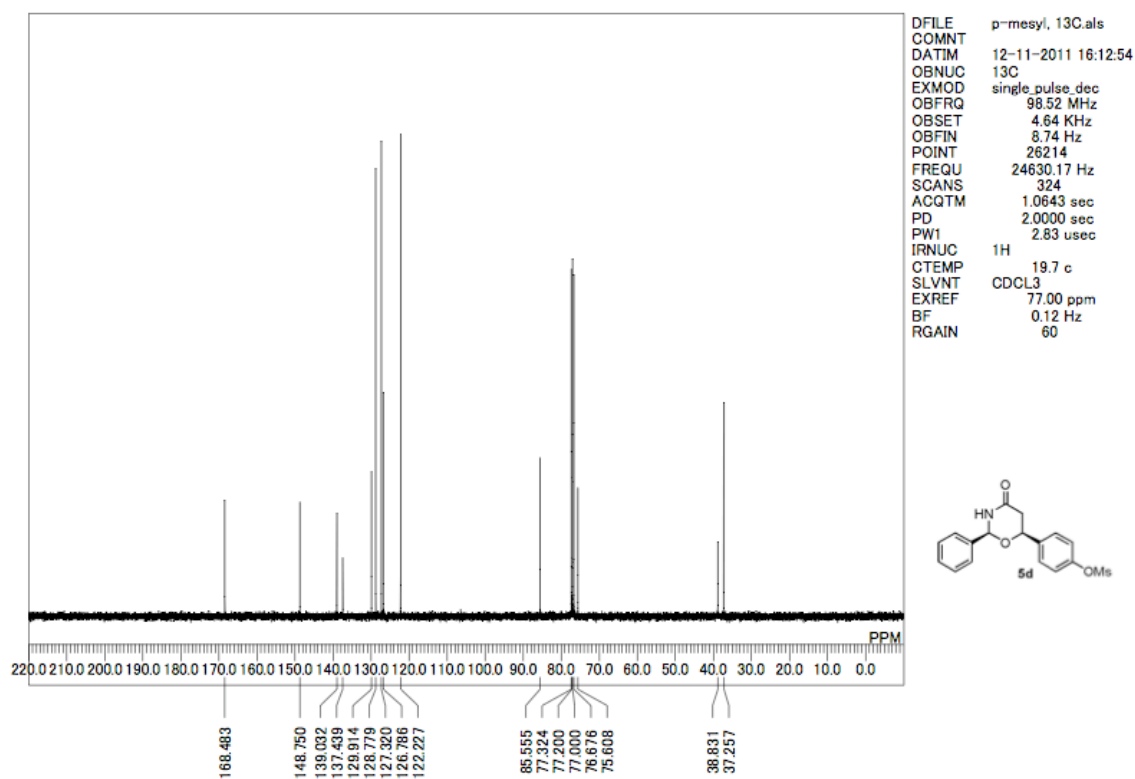



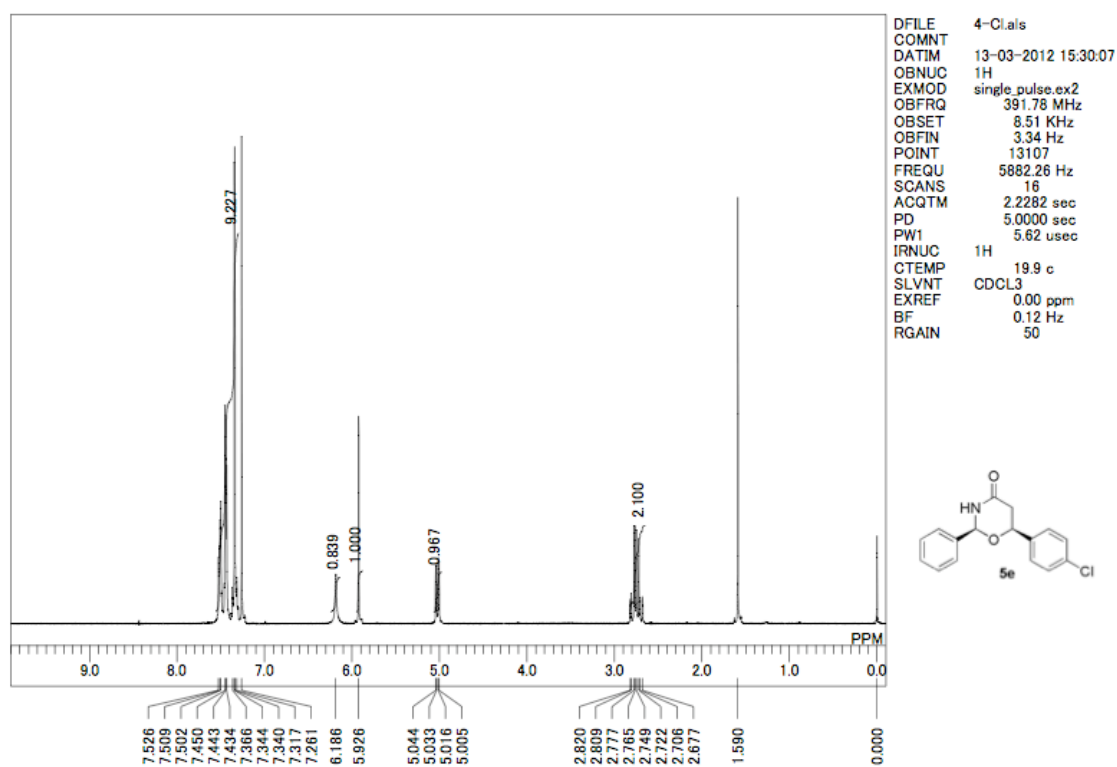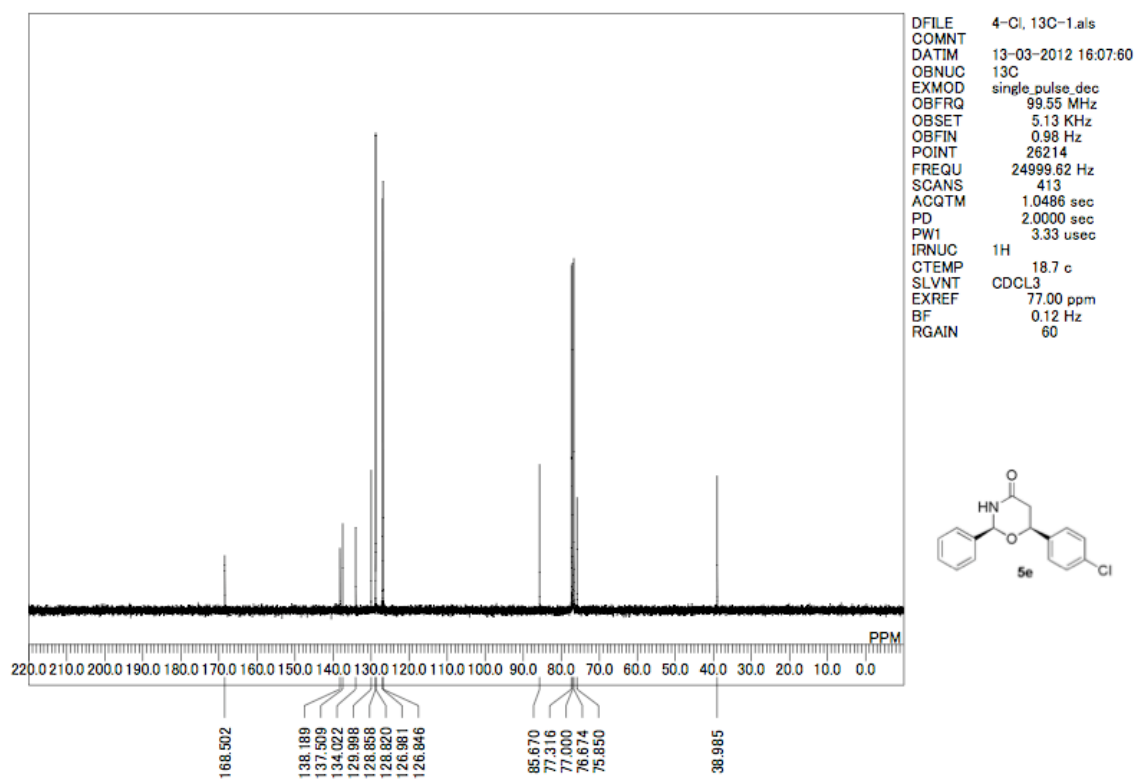

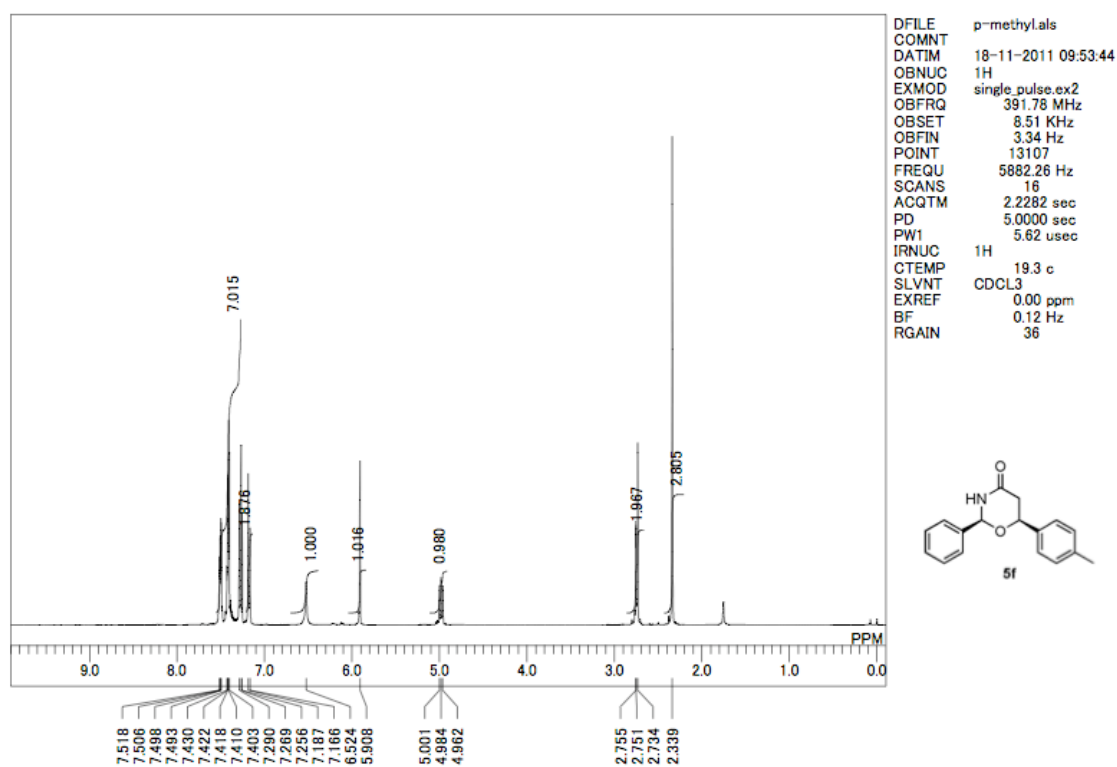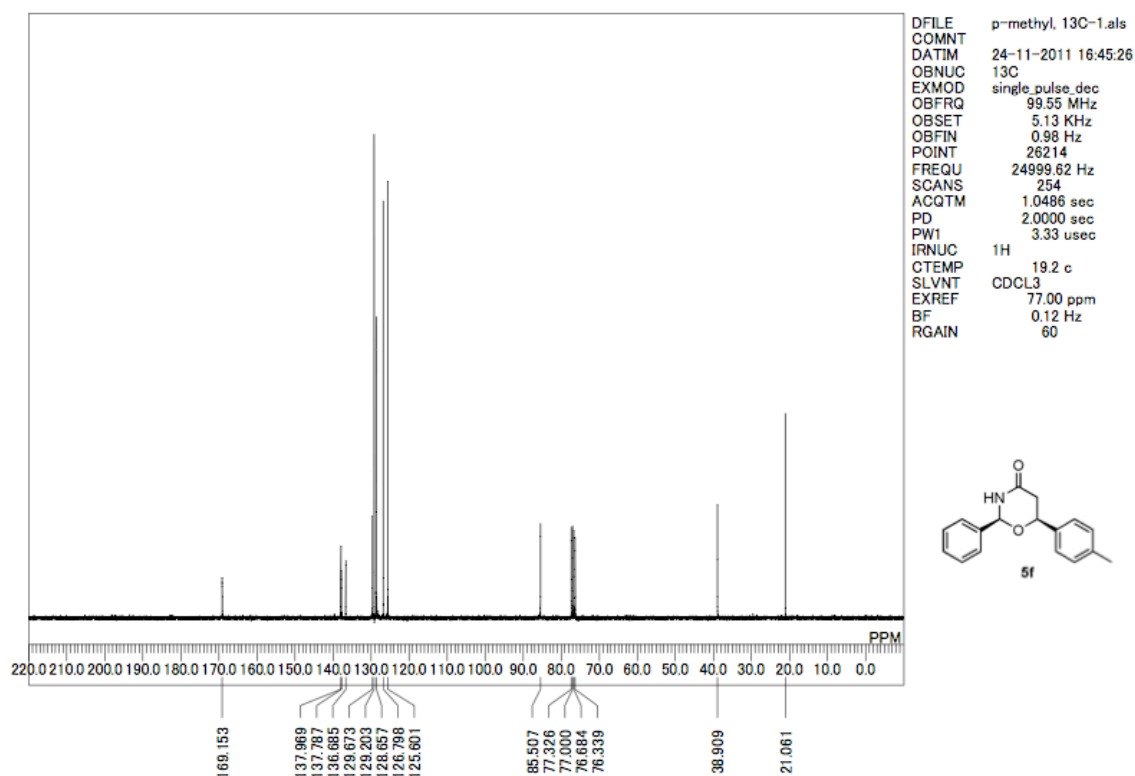

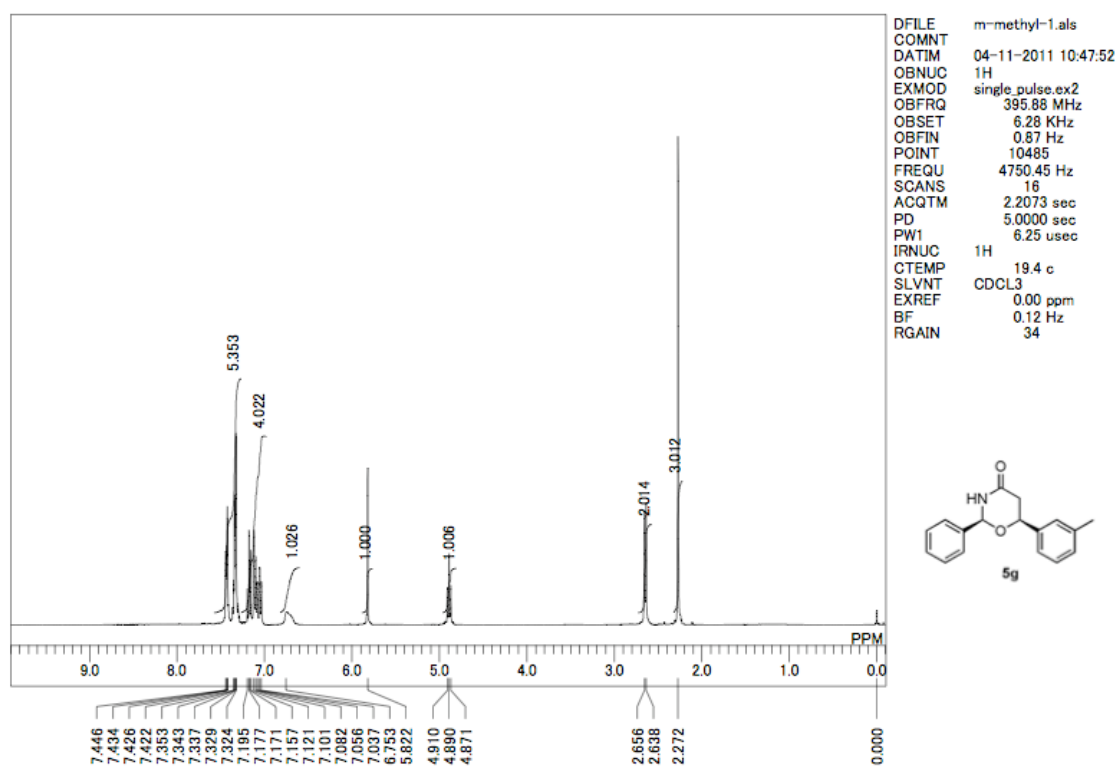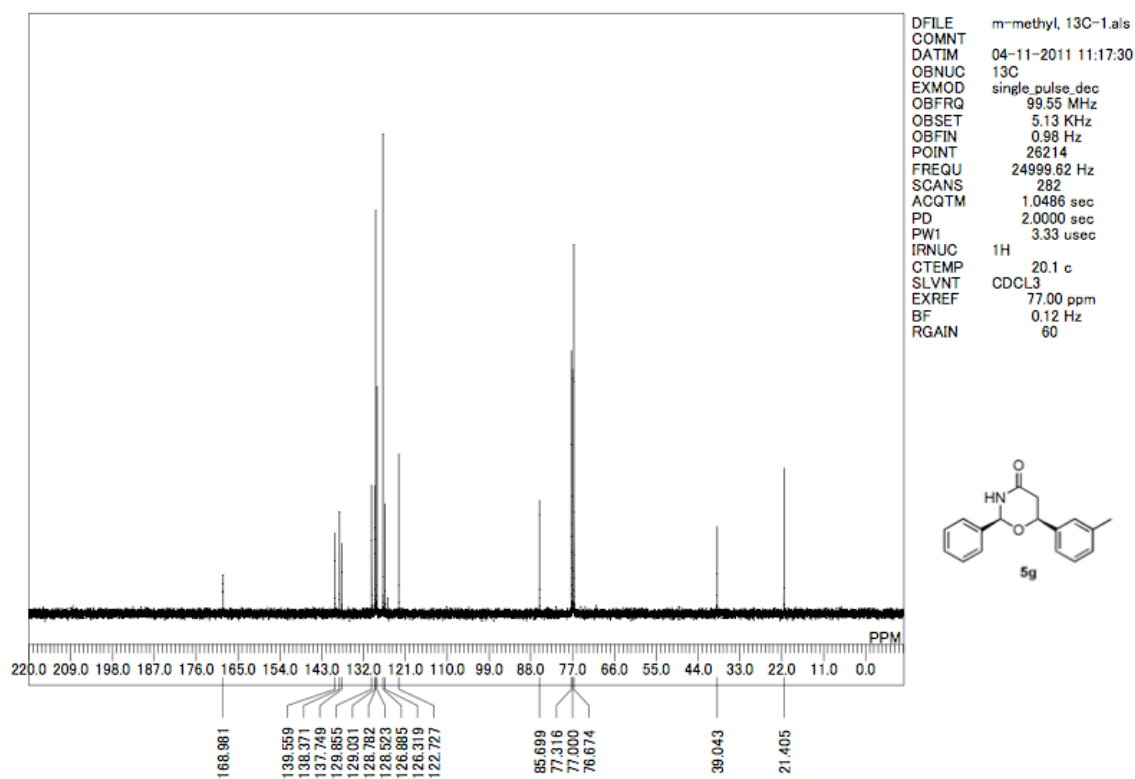

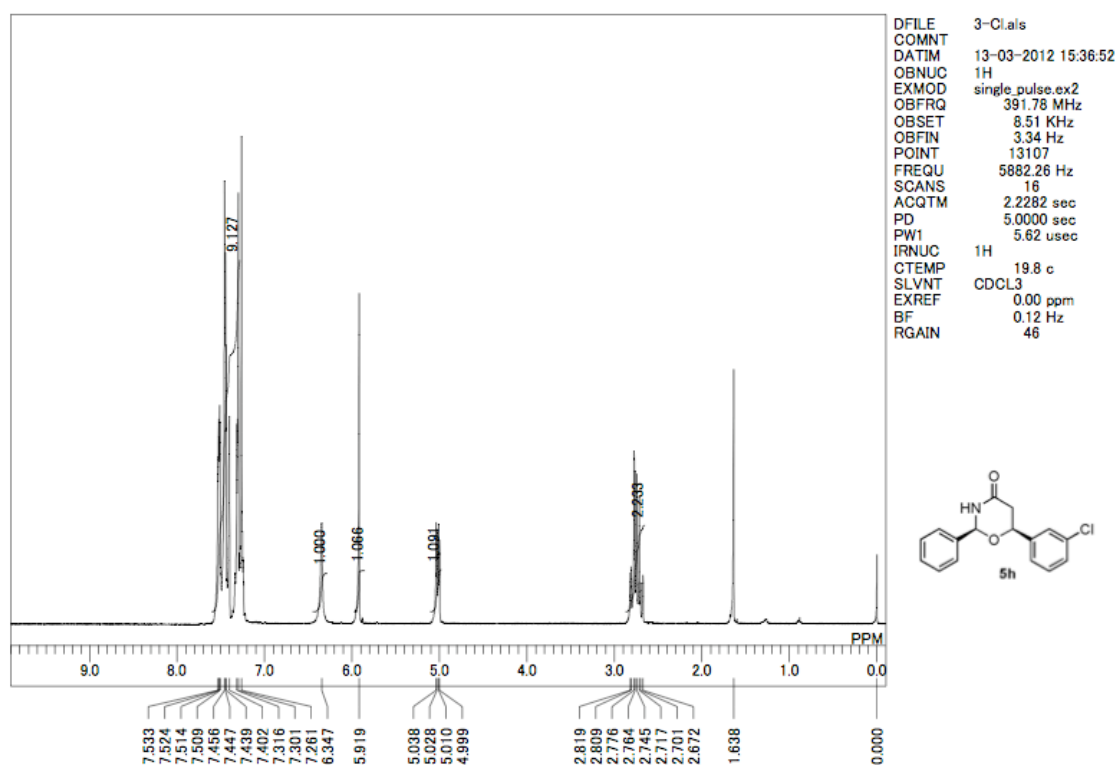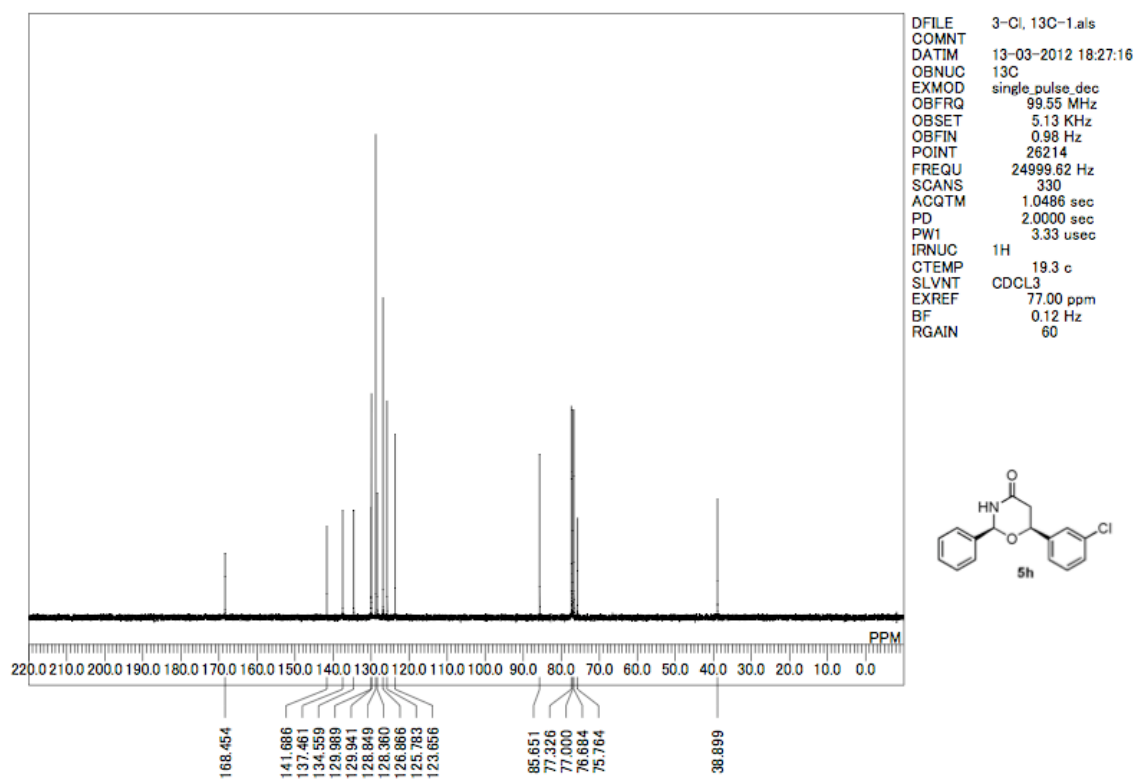

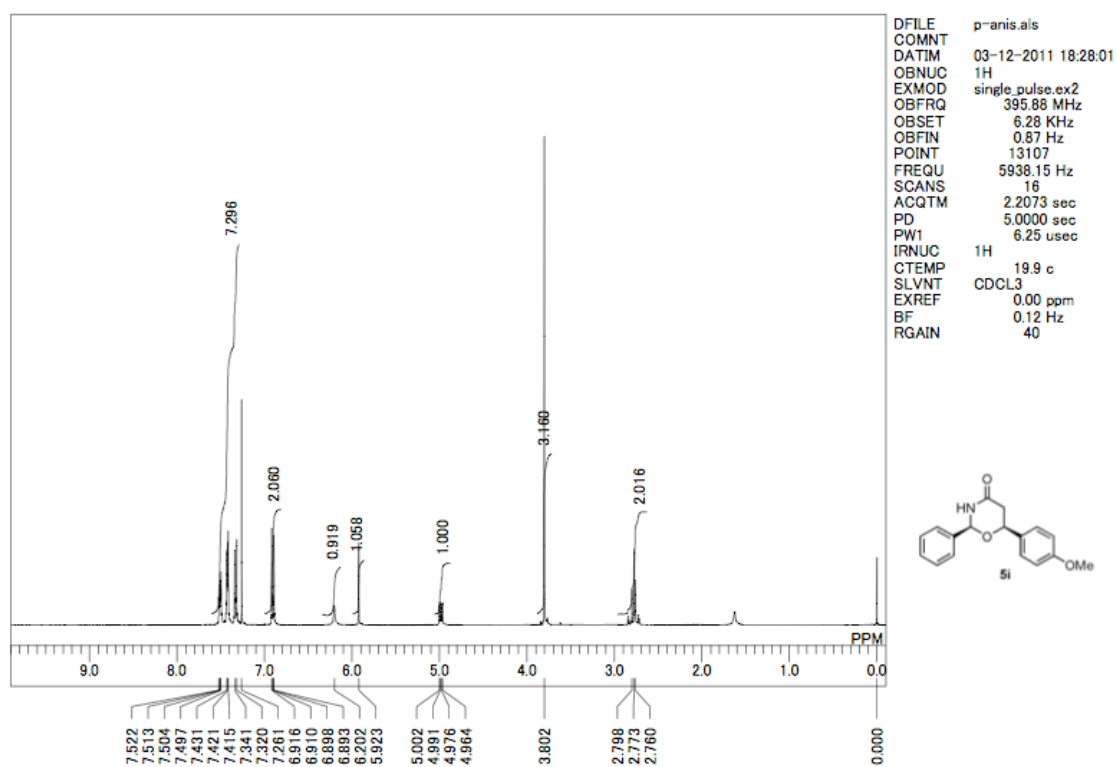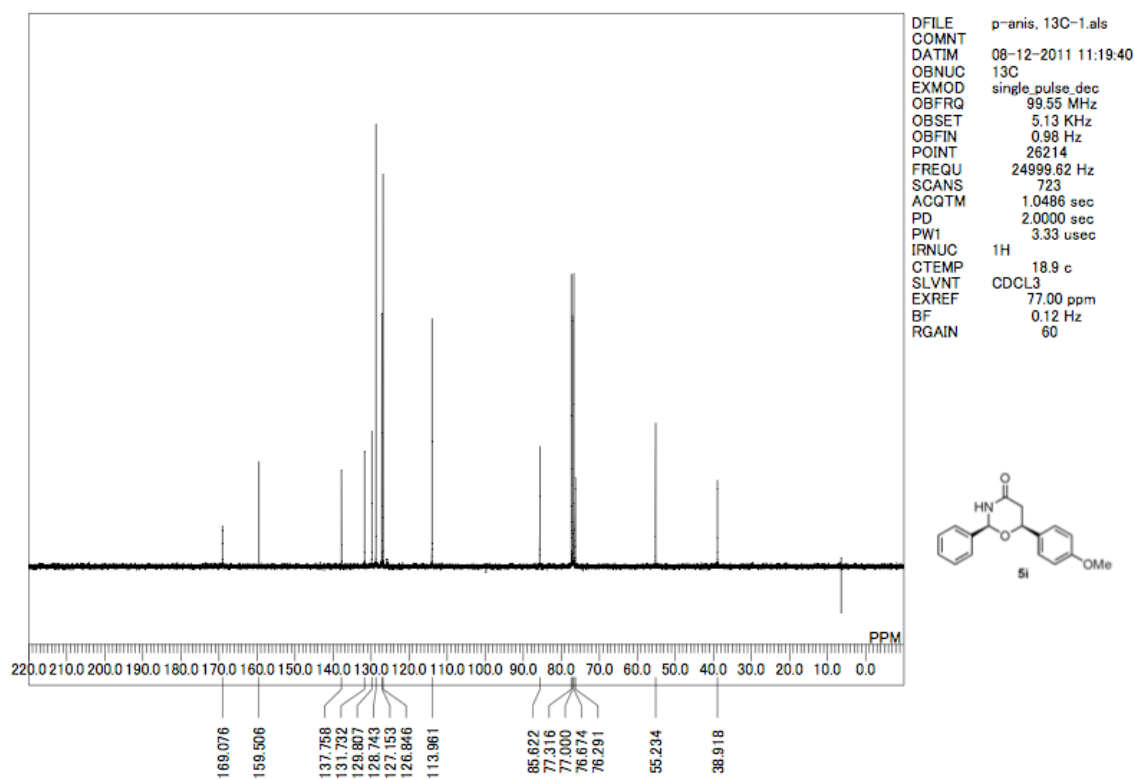

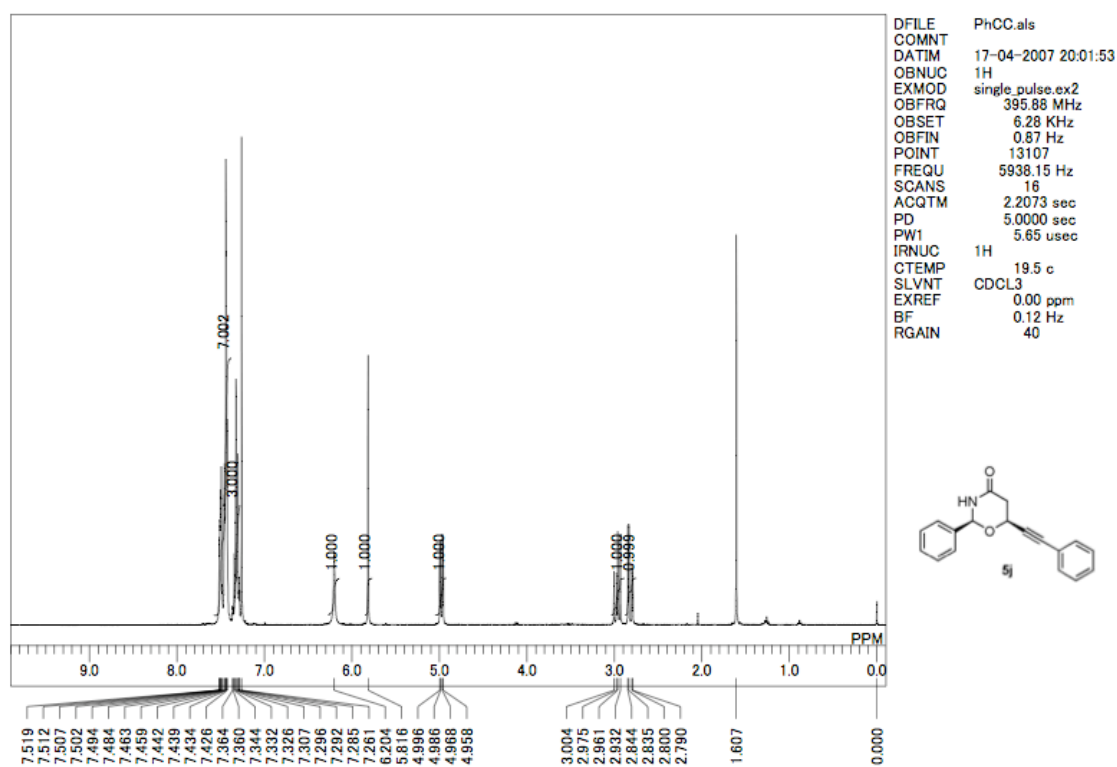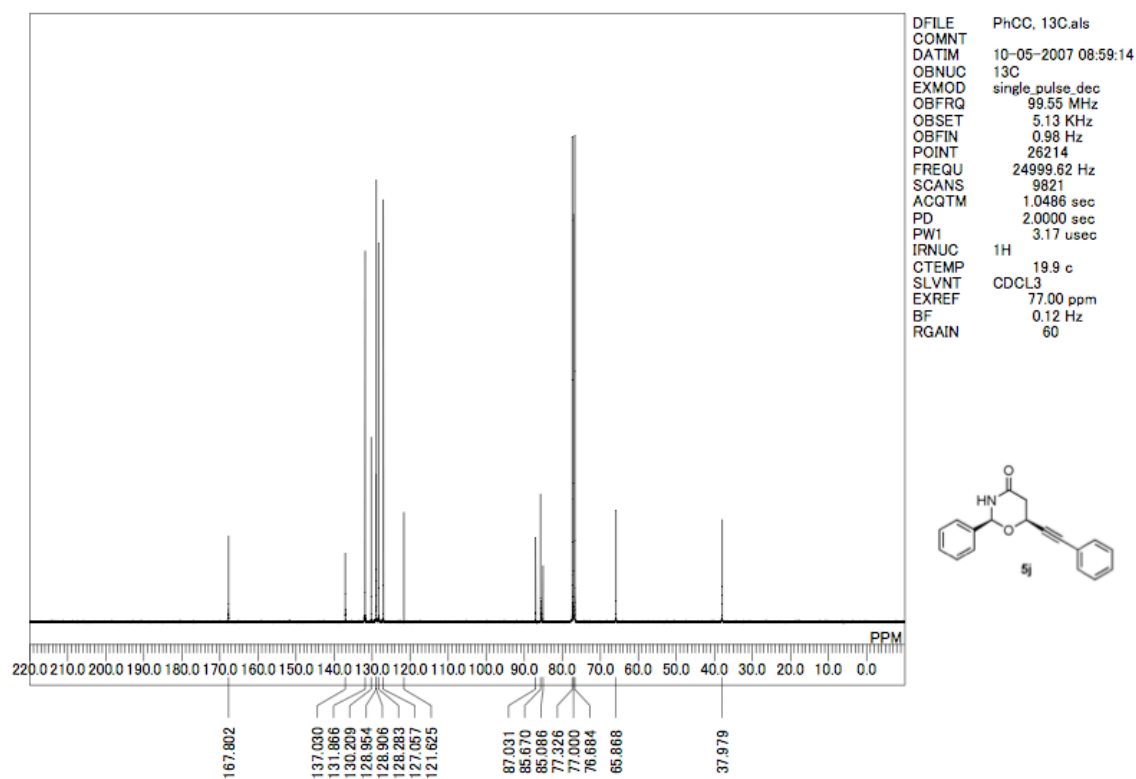



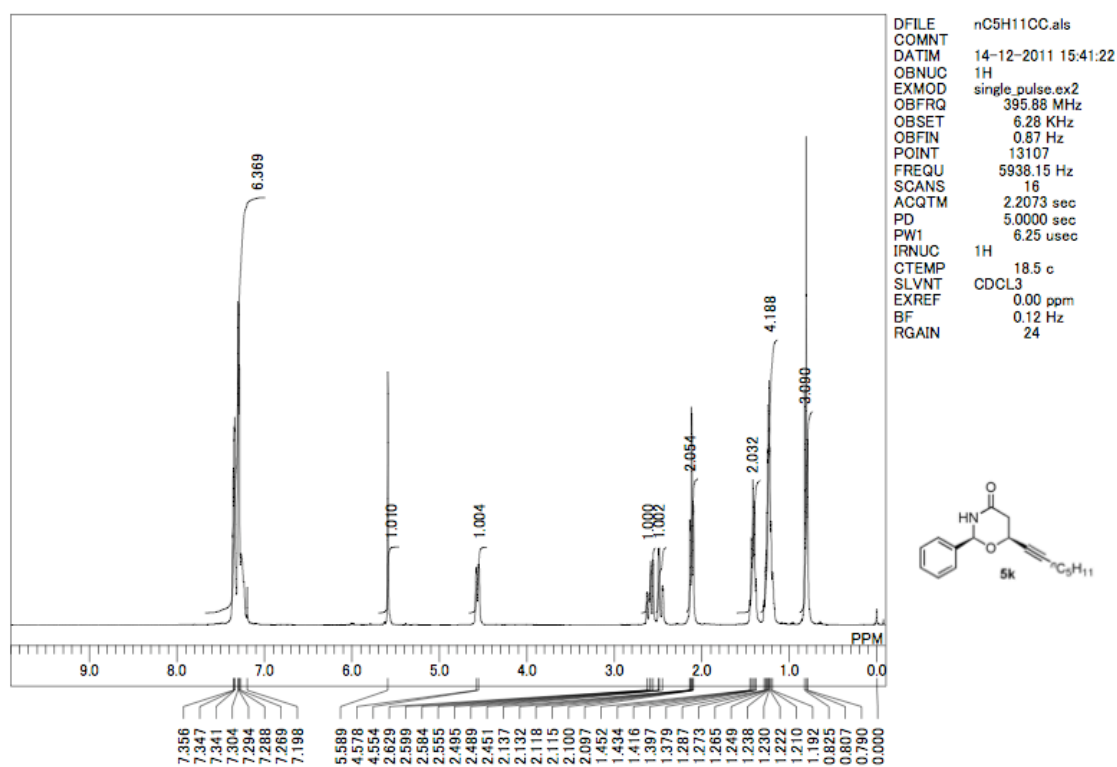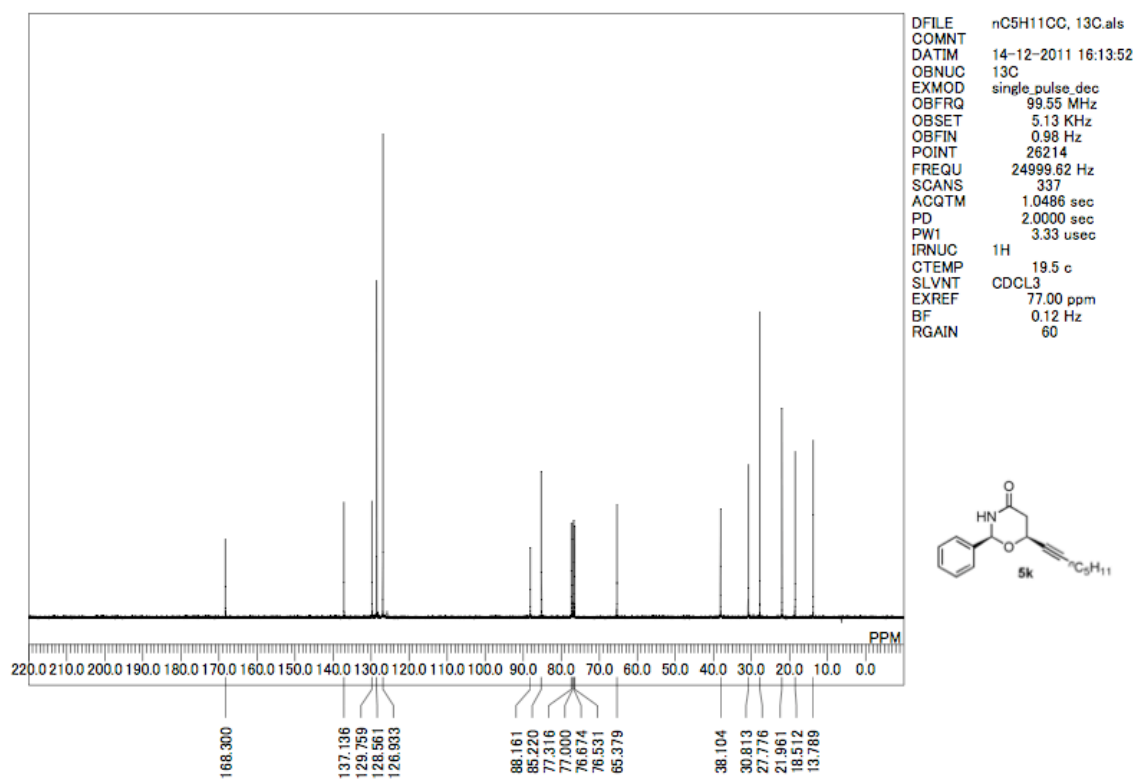

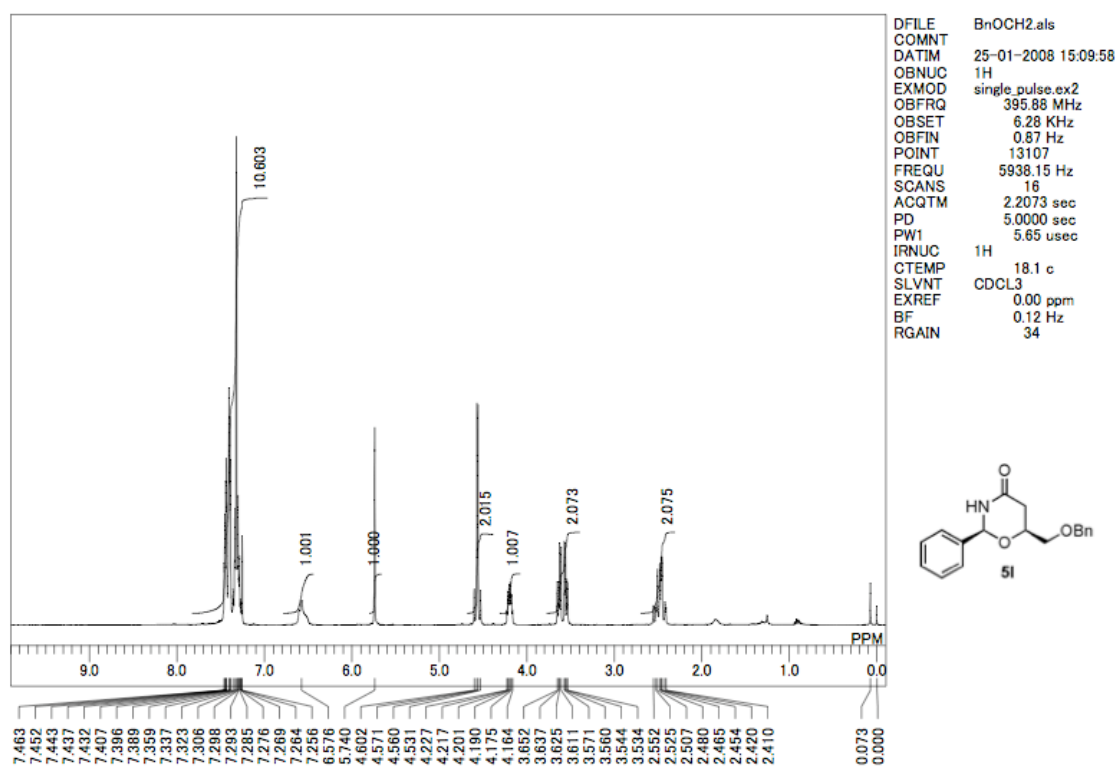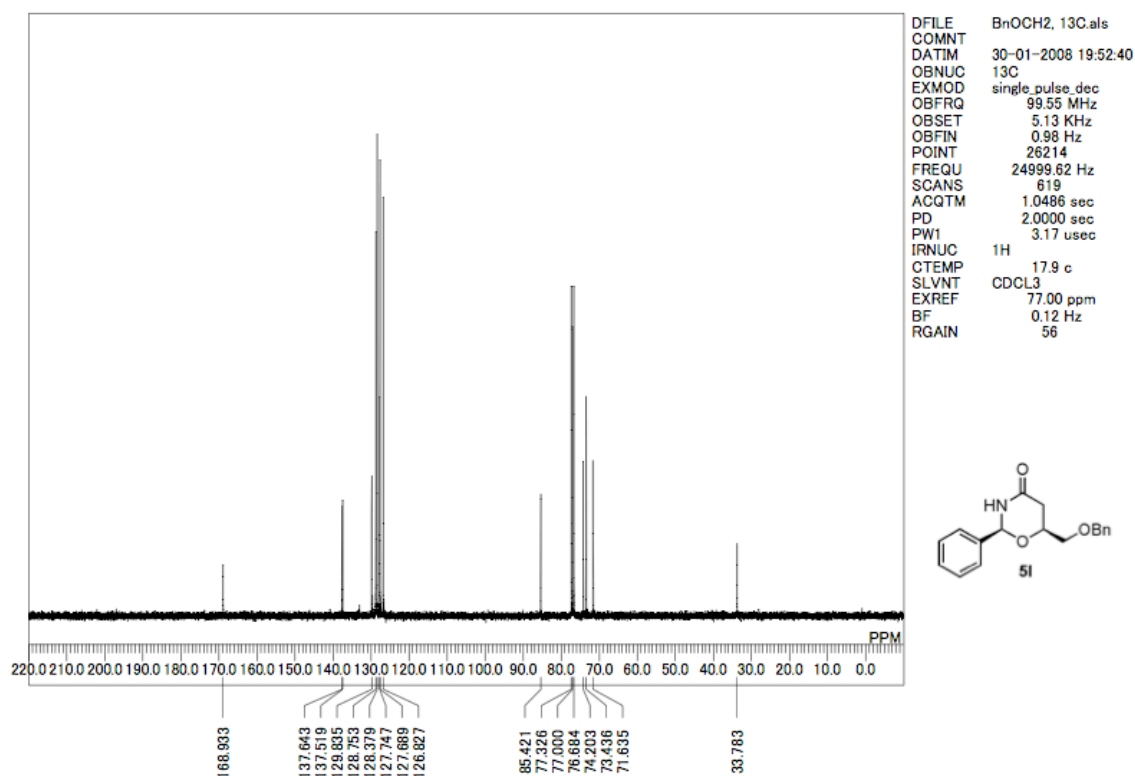

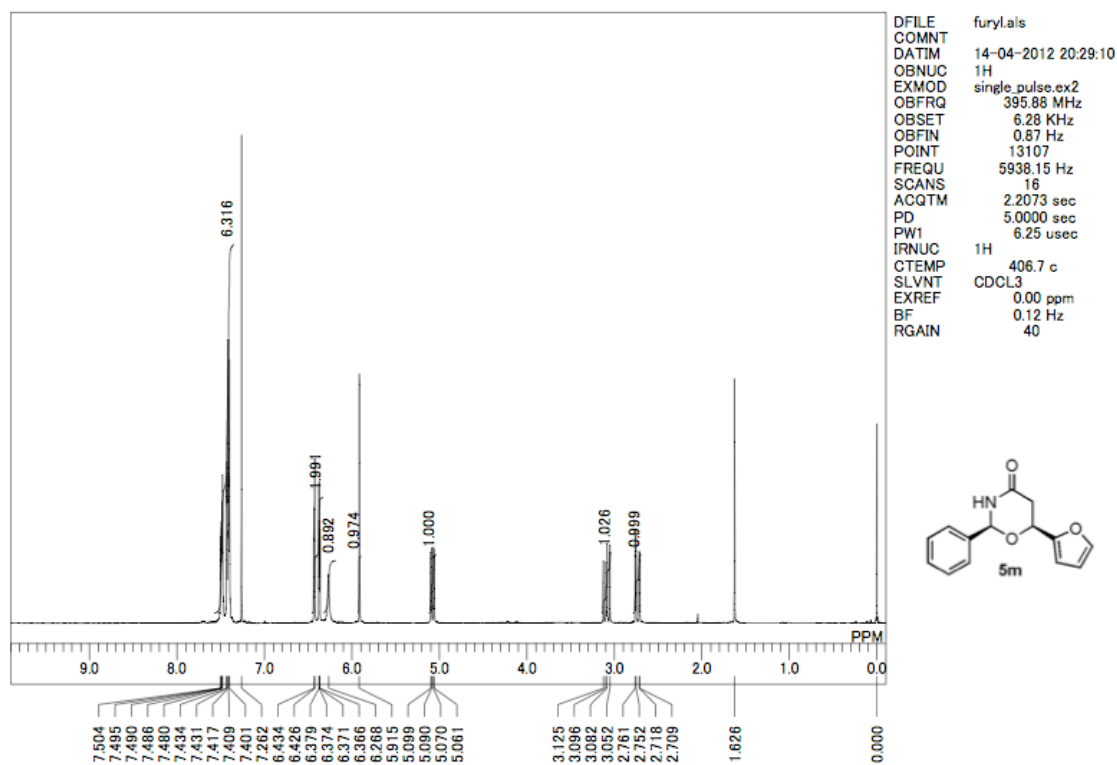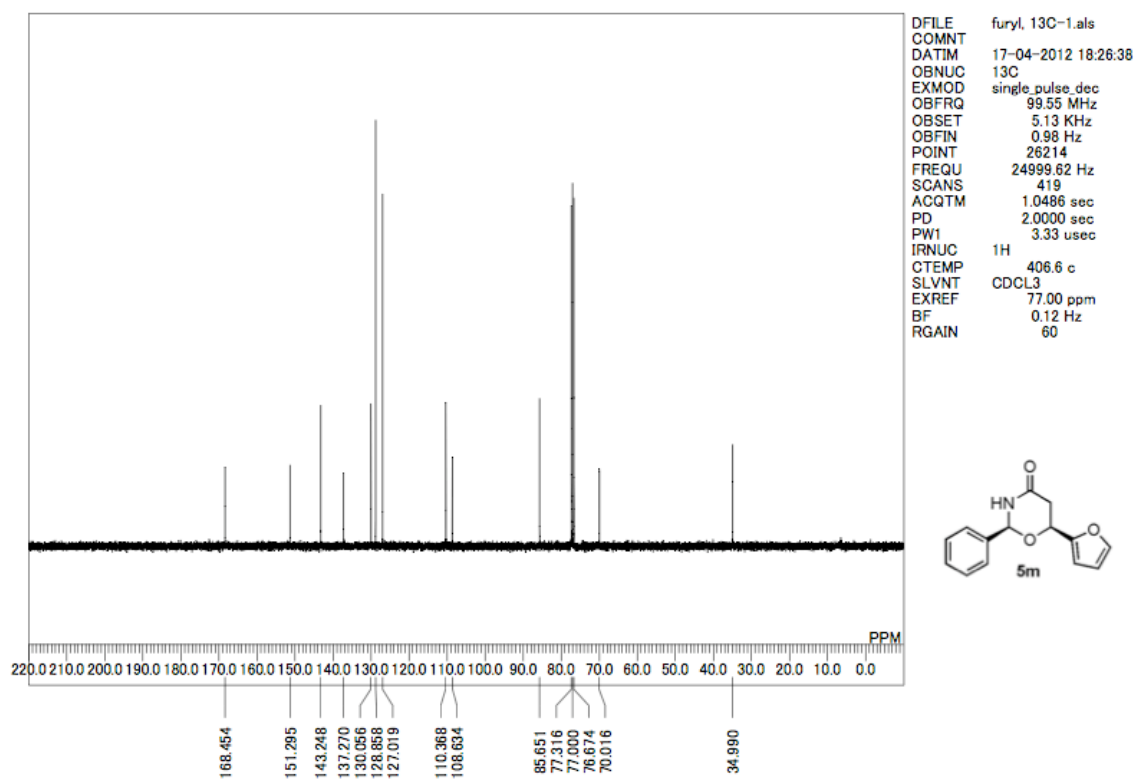

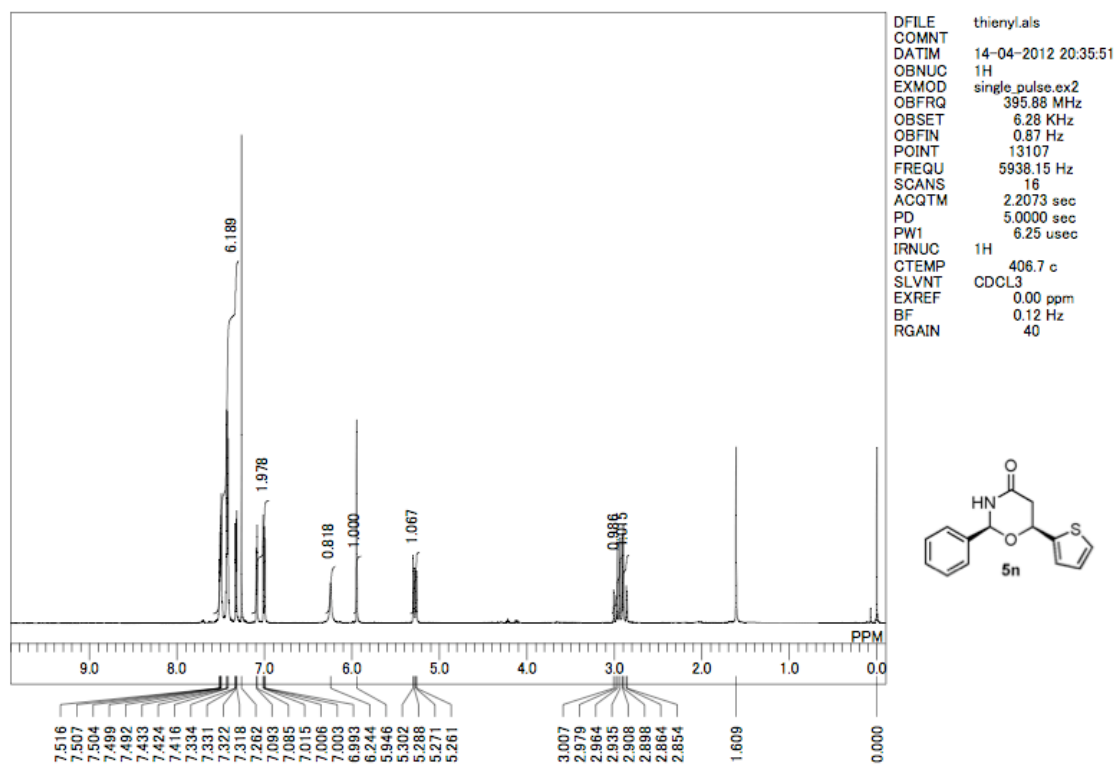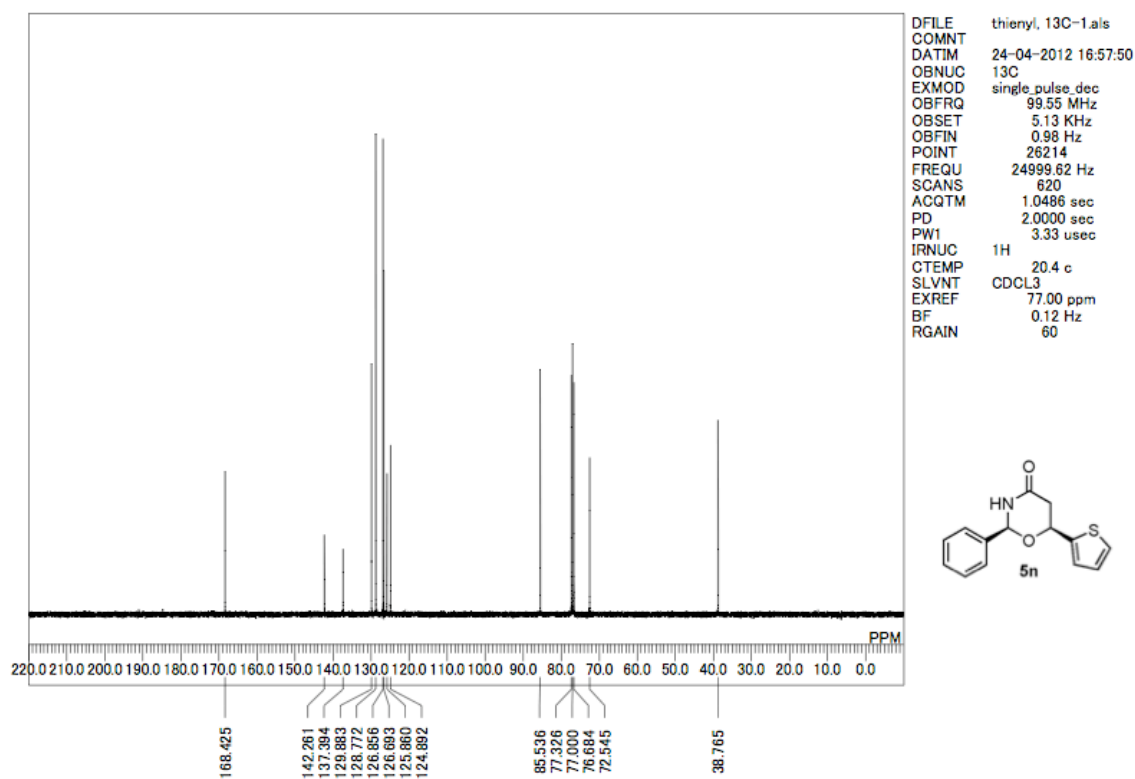

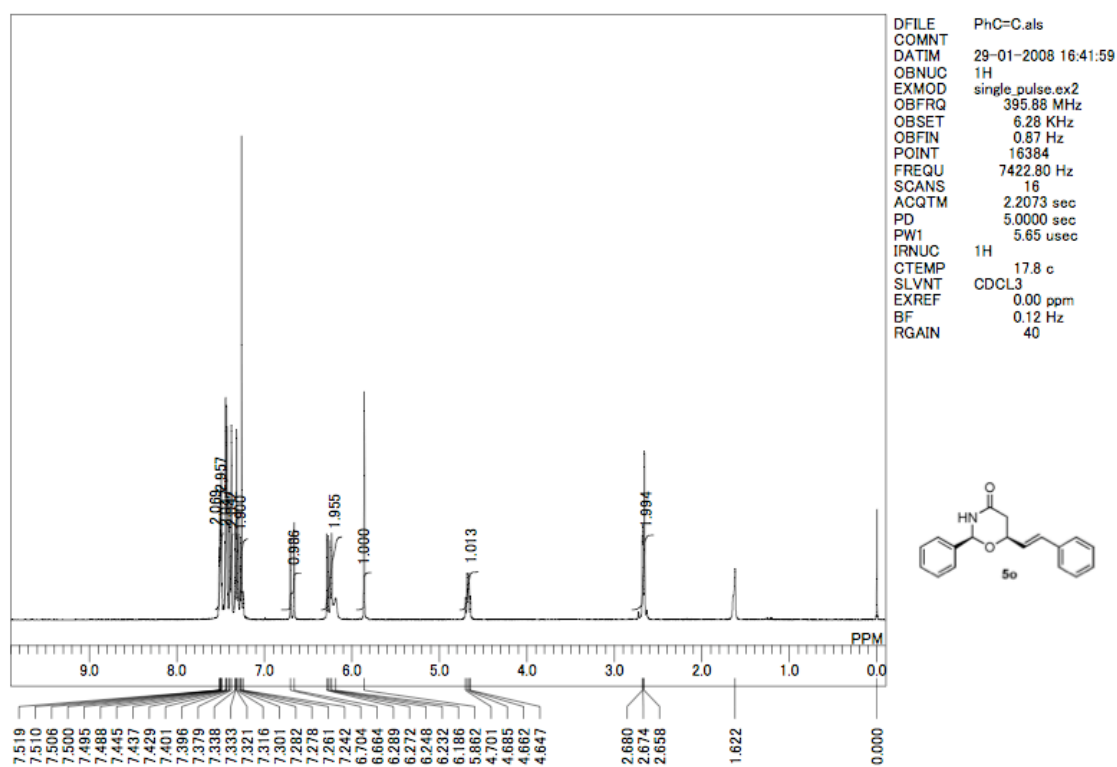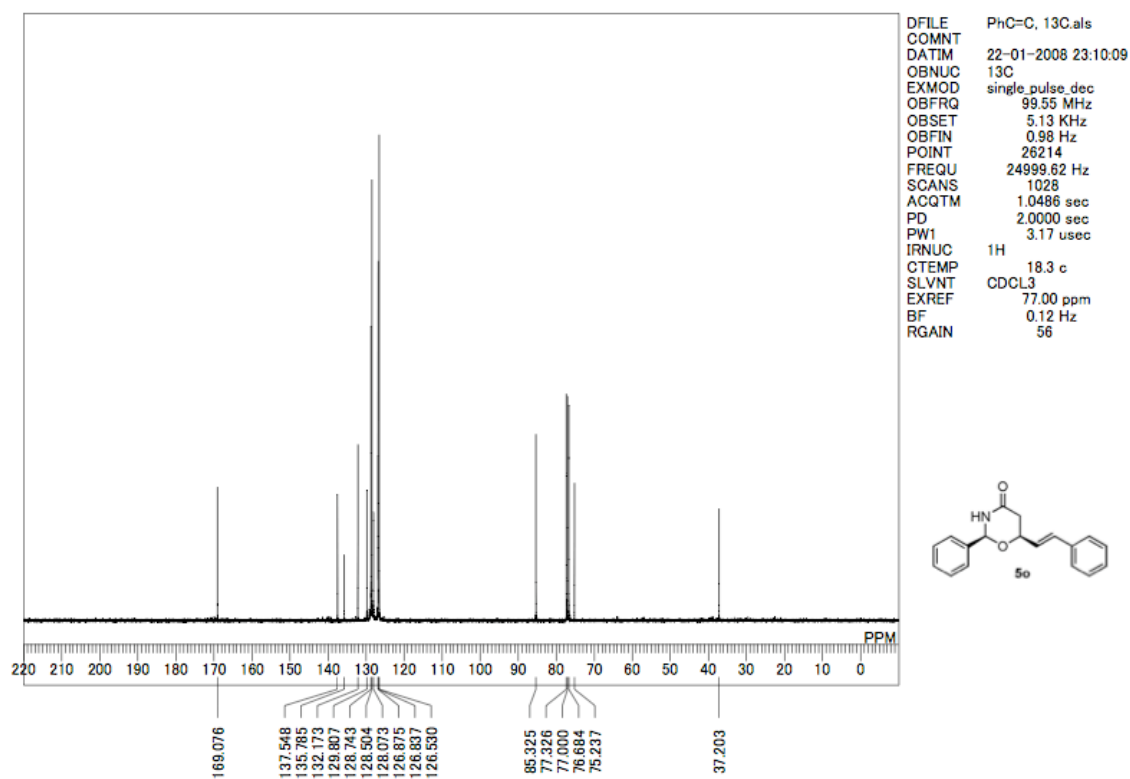

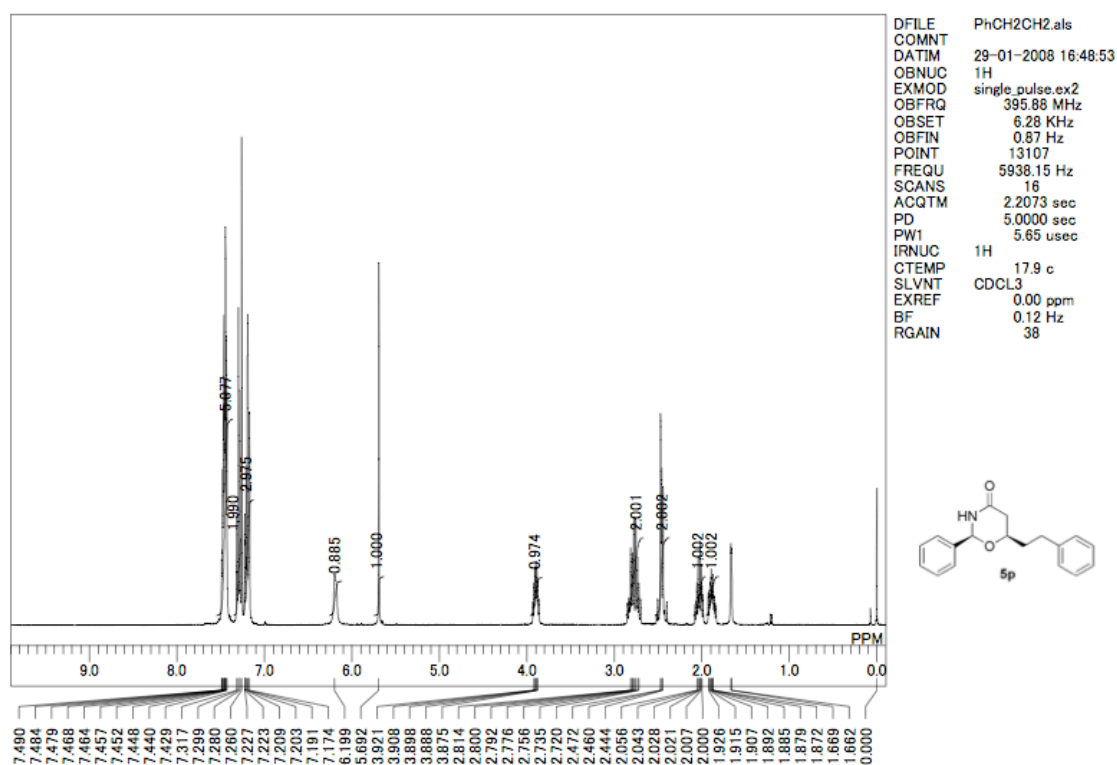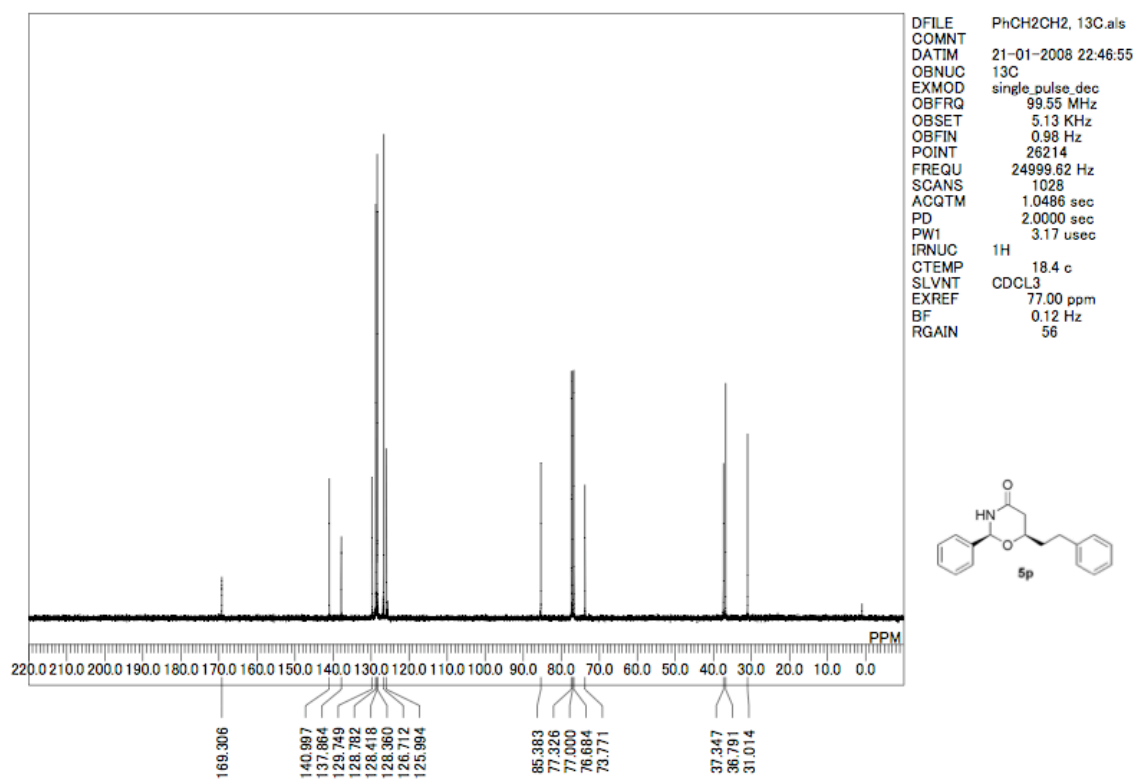

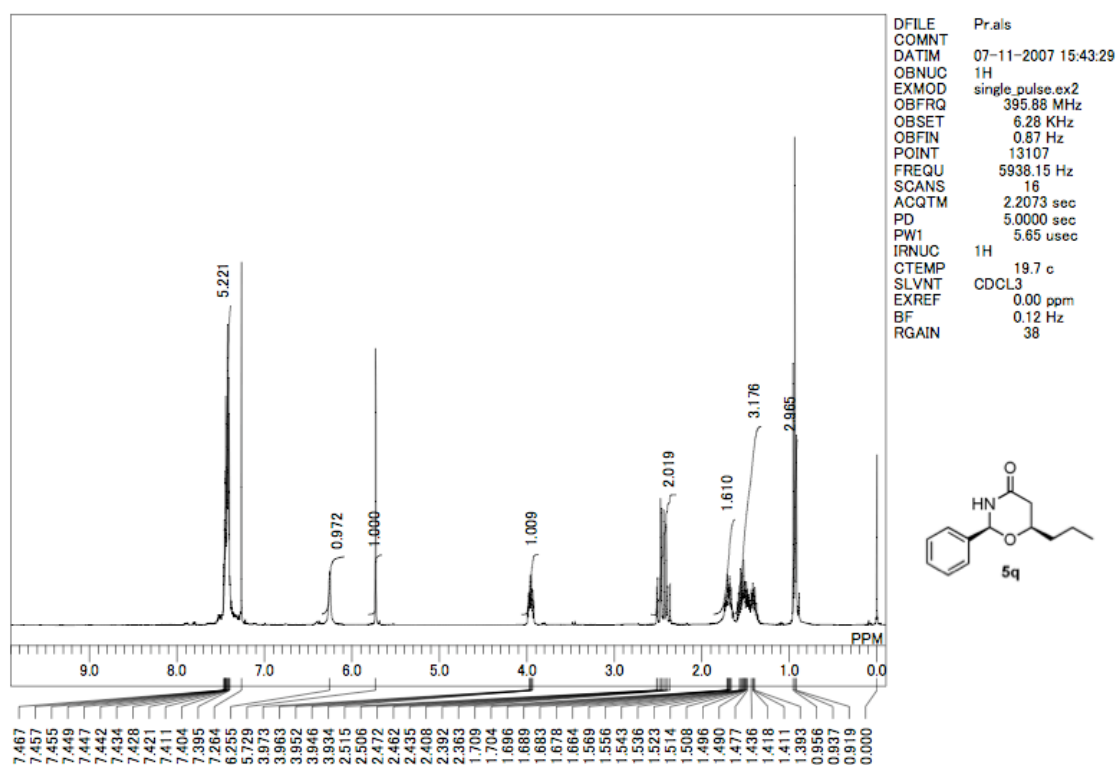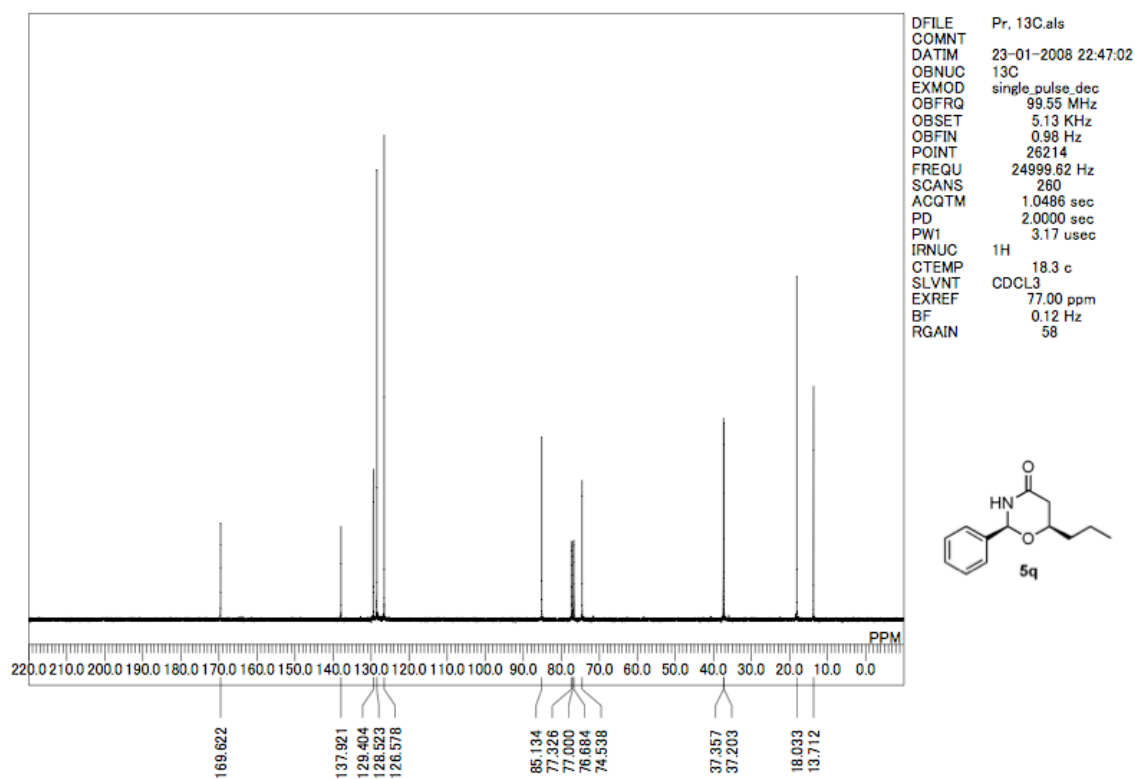



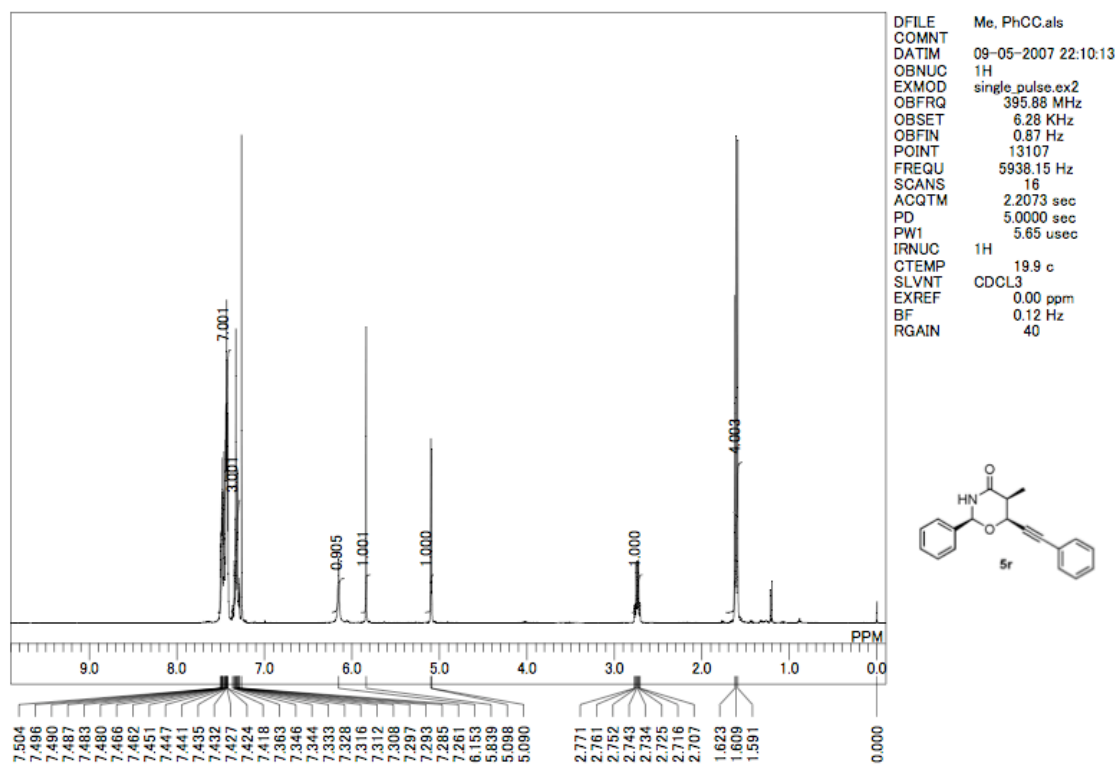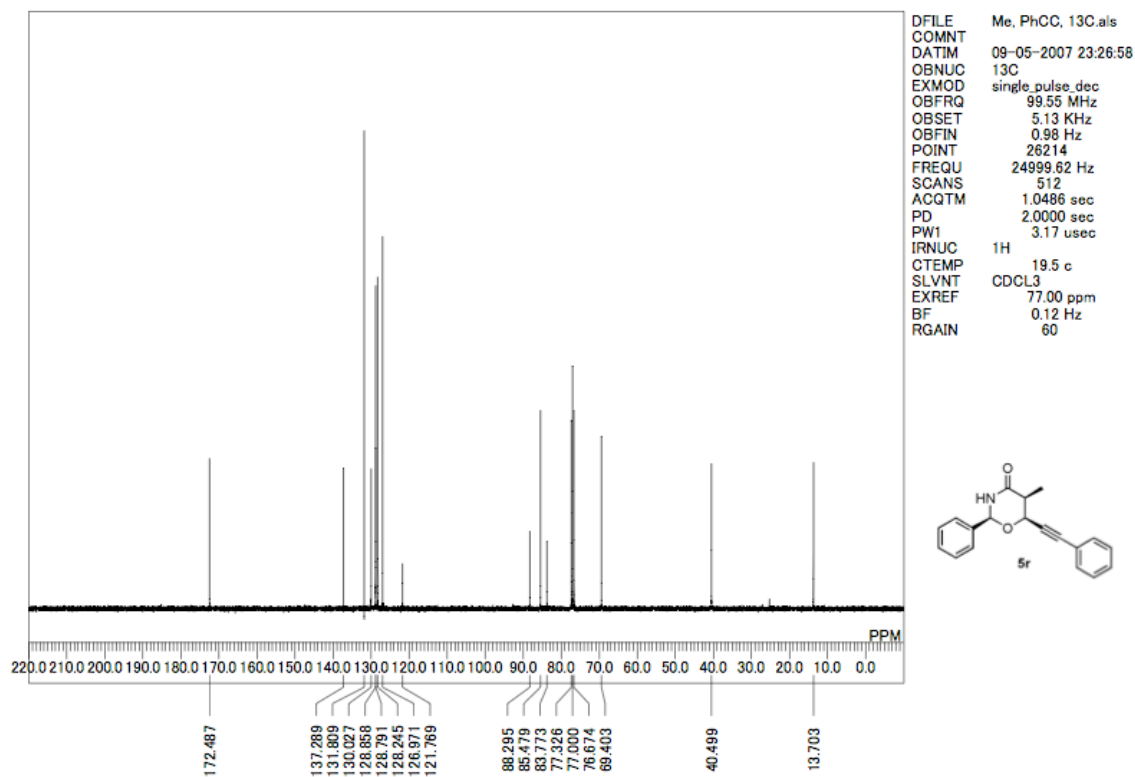

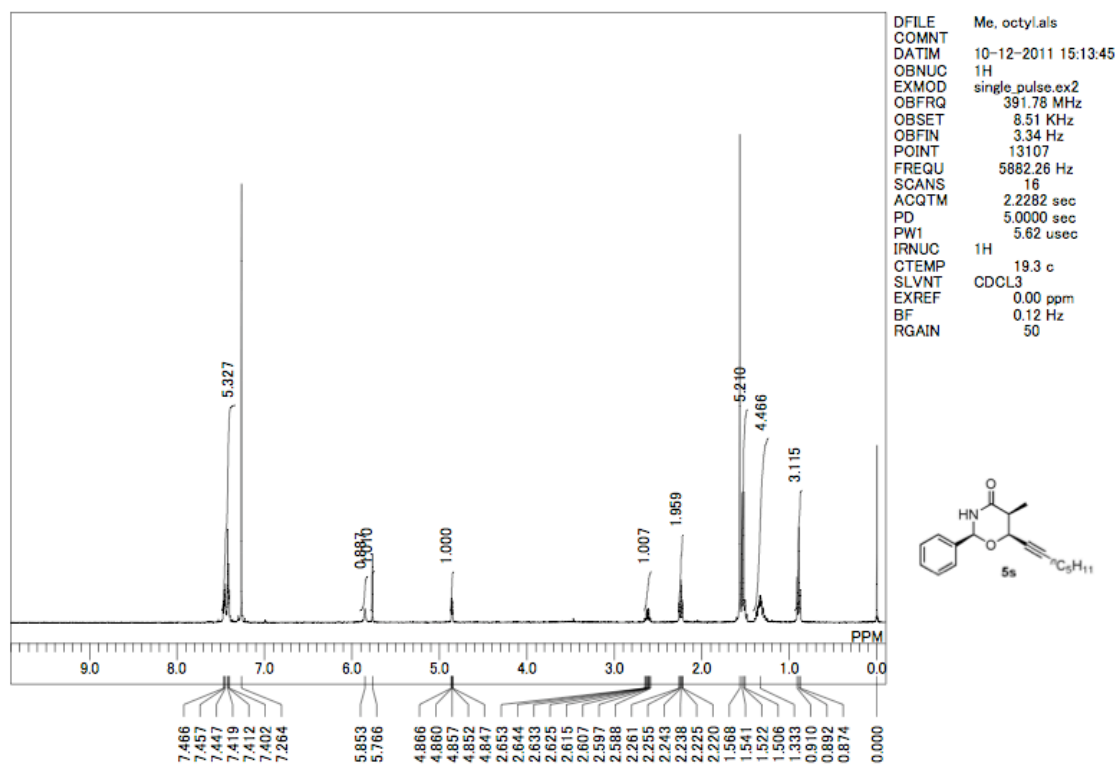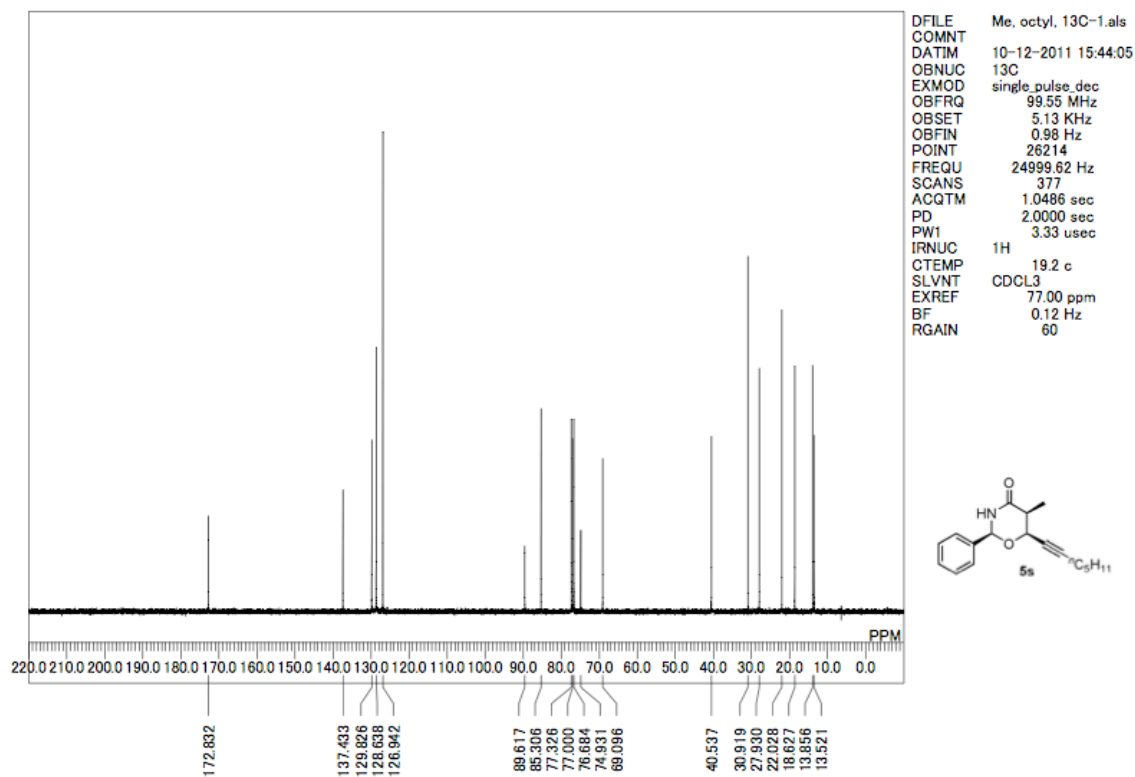



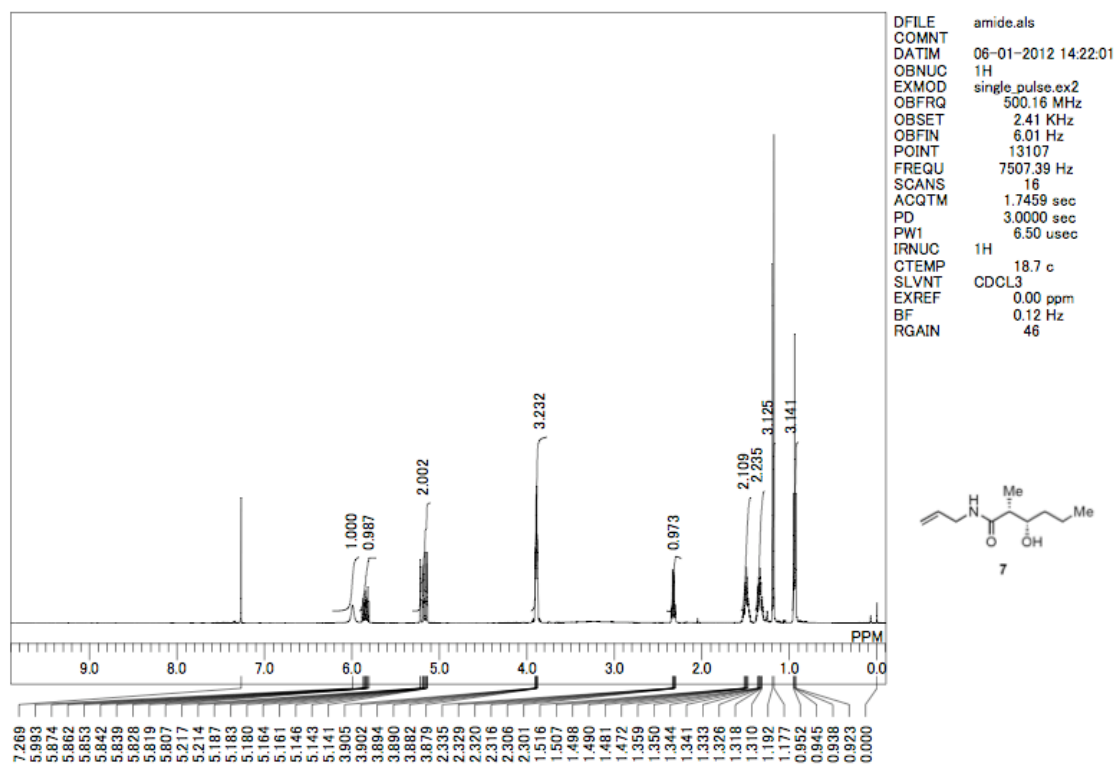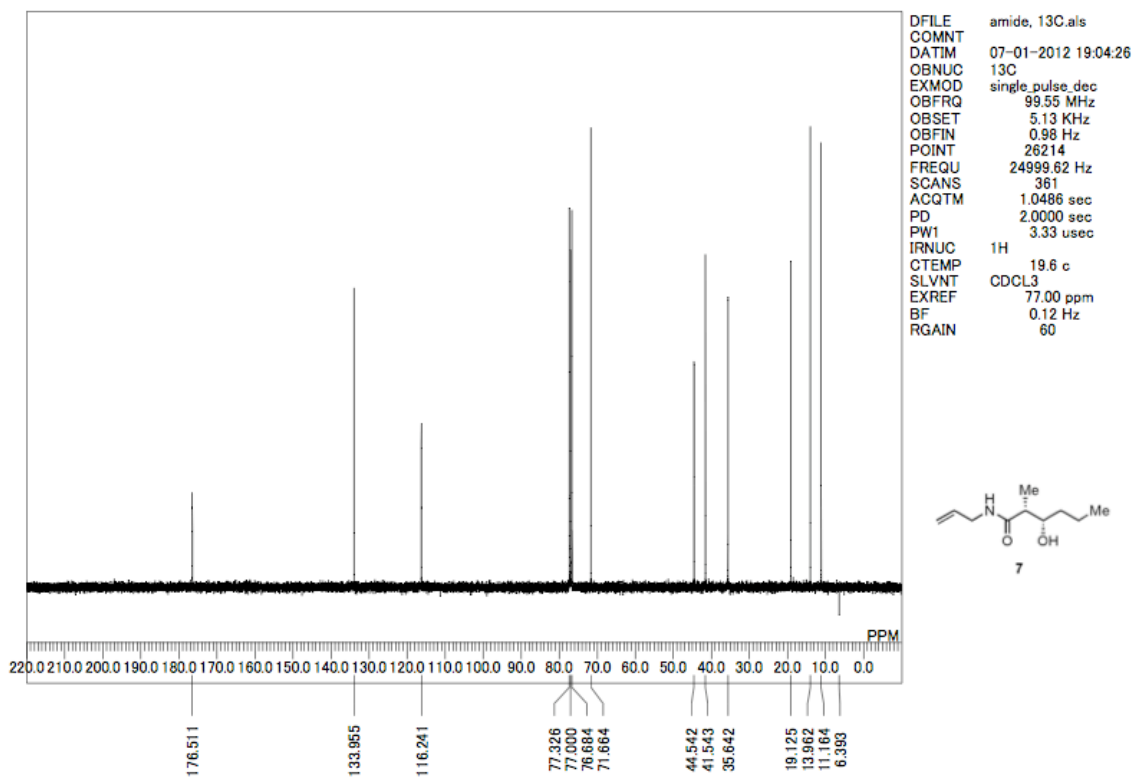

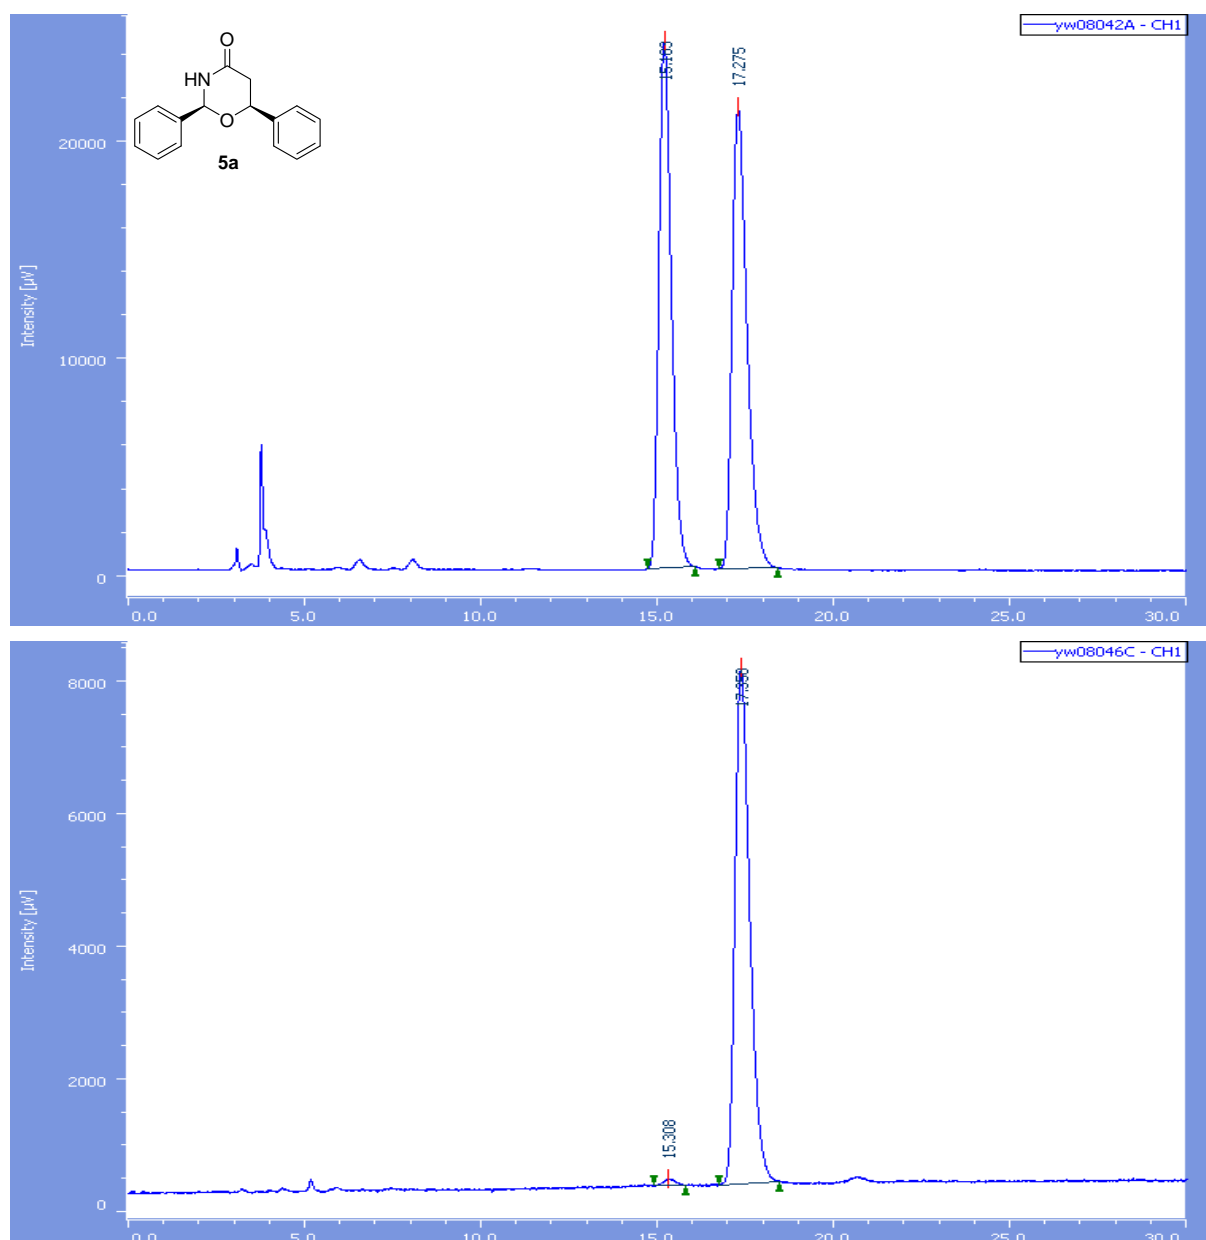

**5a (racemate)**

| Peak No. | Time (min) | Area [m V. Sec] | Area % |
|----------|------------|-----------------|--------|
| 1        | 15.18      | 618563          | 49.83  |
| 2        | 17.28      | 622652          | 50.17  |

**5a**

| Peak No. | Time (min) | Area [m V. Sec] | Area % |
|----------|------------|-----------------|--------|
| 1        | 15.31      | 2416            | 1.06   |
| 2        | 17.36      | 226185          | 98.94  |

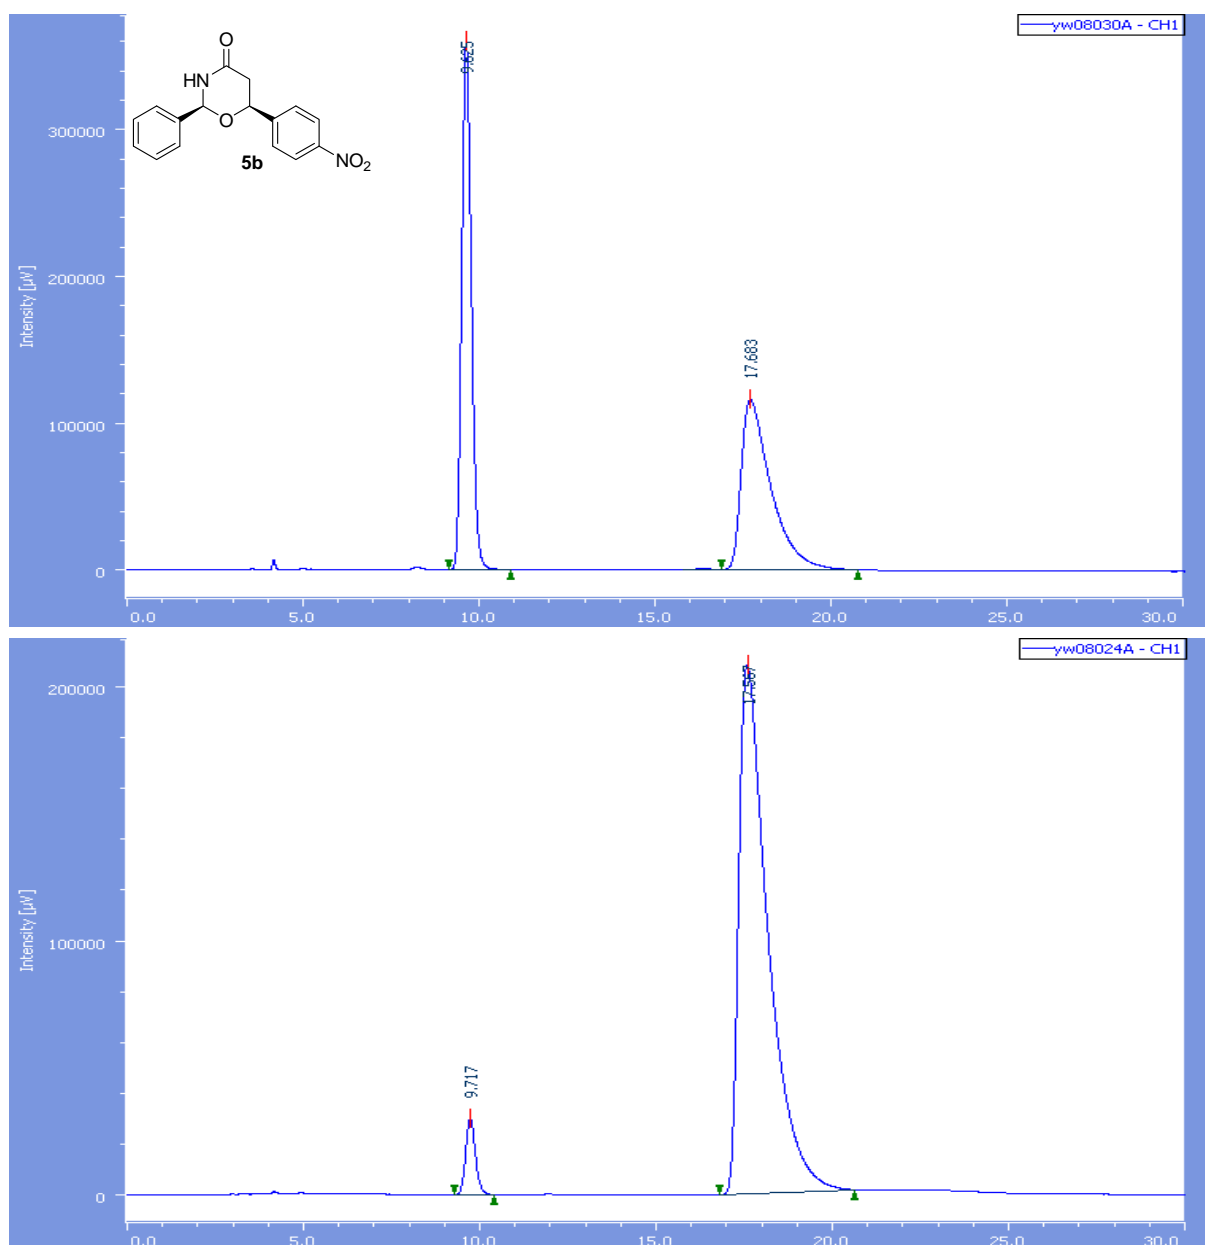

**5b (racemate)**

| Peak No. | Time (min) | Area [m V. Sec] | Area % |
|----------|------------|-----------------|--------|
| 1        | 9.63       | 6837382         | 50.28  |
| 2        | 17.68      | 6761453         | 49.72  |

**5b**

| Peak No. | Time (min) | Area [m V. Sec] | Area % |
|----------|------------|-----------------|--------|
| 1        | 9.72       | 574974          | 4.58   |
| 2        | 17.56      | 11987345        | 95.42  |

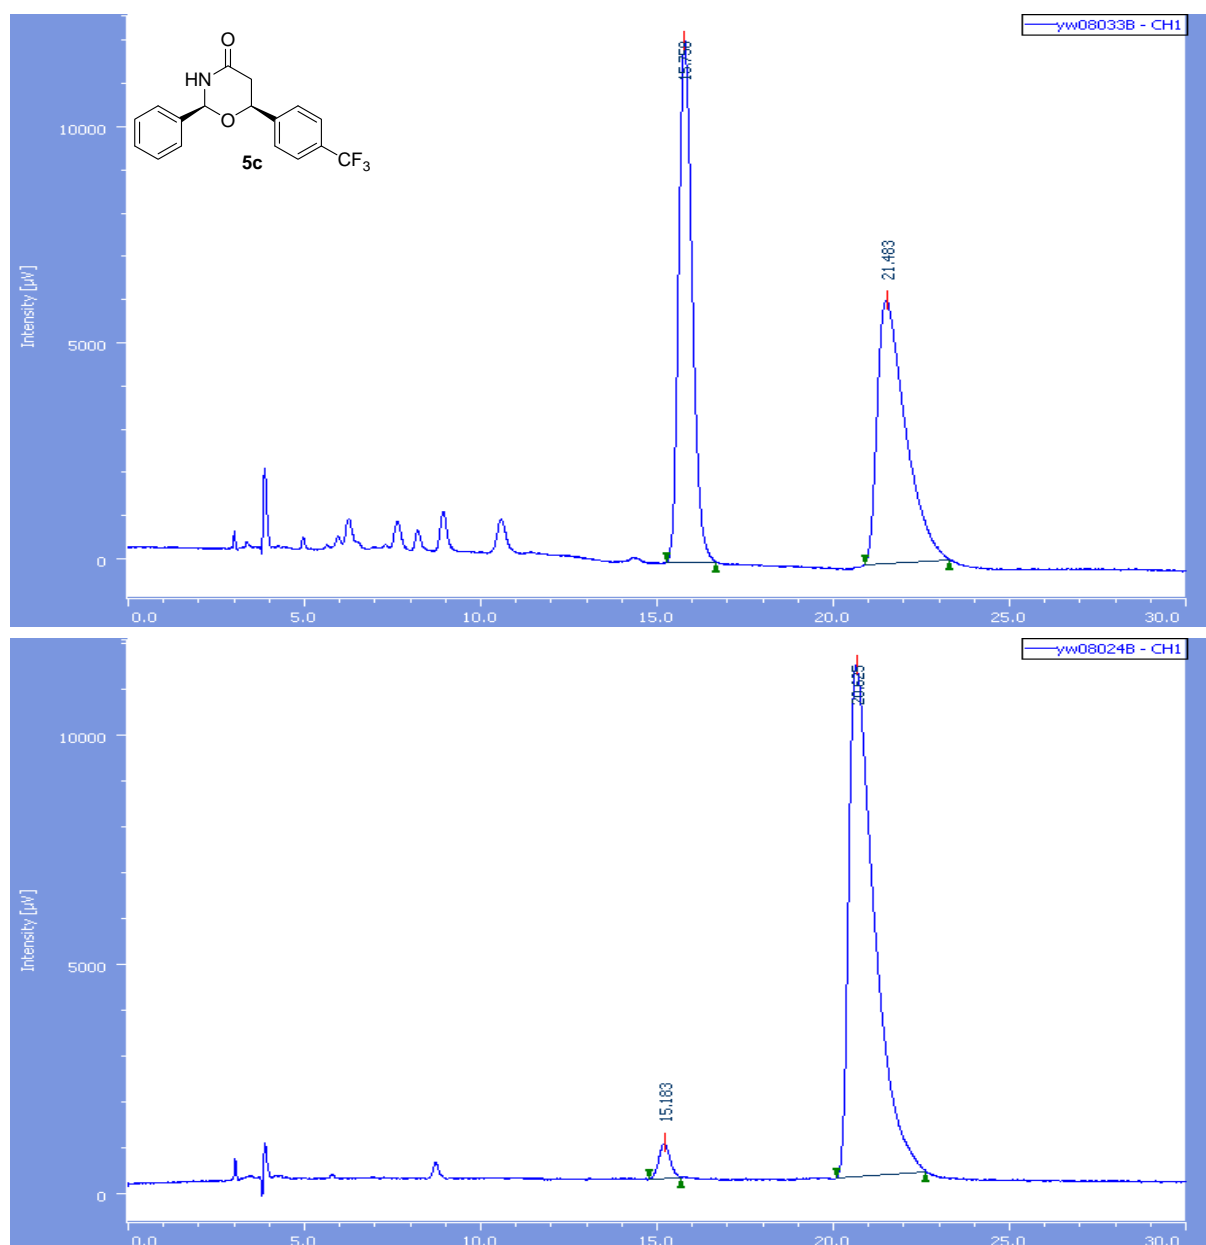

**5c (racemate)**

| Peak No. | Time (min) | Area [m V. Sec] | Area % |
|----------|------------|-----------------|--------|
| 1        | 15.76      | 334578          | 49.75  |
| 2        | 21.48      | 337952          | 50.25  |

**5c**

| Peak No. | Time (min) | Area [m V. Sec] | Area % |
|----------|------------|-----------------|--------|
| 1        | 15.18      | 16738           | 2.88   |
| 2        | 20.63      | 564681          | 97.12  |



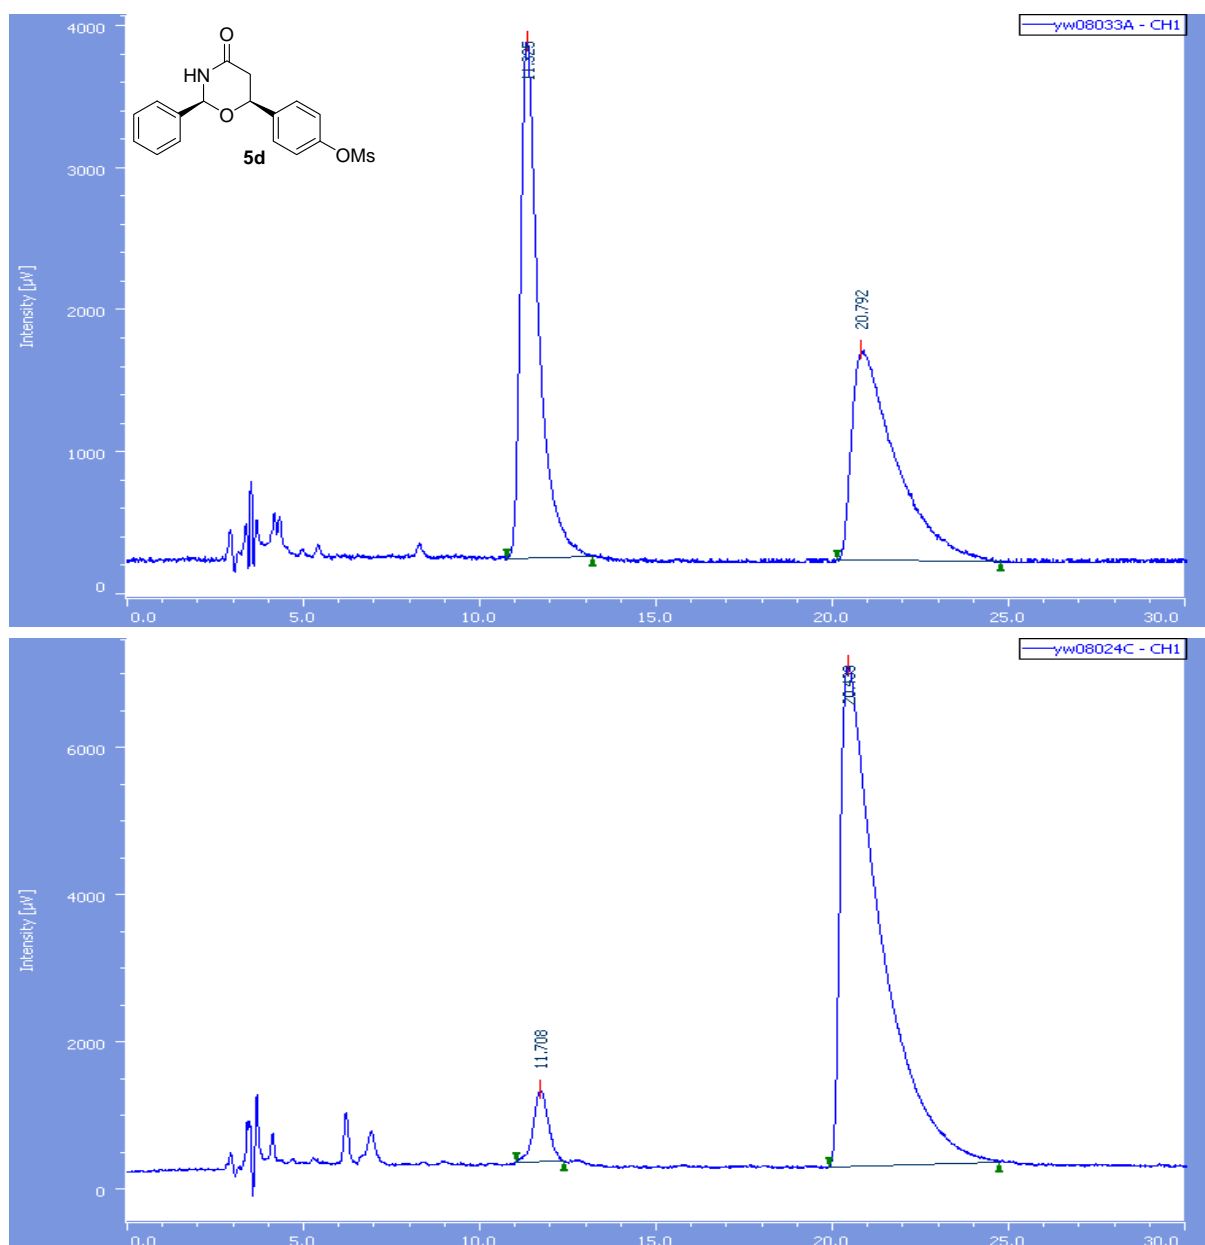

**5d (racemate)**

| Peak No. | Time (min) | Area [m V. Sec] | Area % |
|----------|------------|-----------------|--------|
| 1        | 11.33      | 128712          | 50.23  |
| 2        | 20.79      | 127514          | 49.77  |

**5d**

| Peak No. | Time (min) | Area [m V. Sec] | Area % |
|----------|------------|-----------------|--------|
| 1        | 11.71      | 28601           | 5.05   |
| 2        | 20.43      | 538002          | 94.95  |

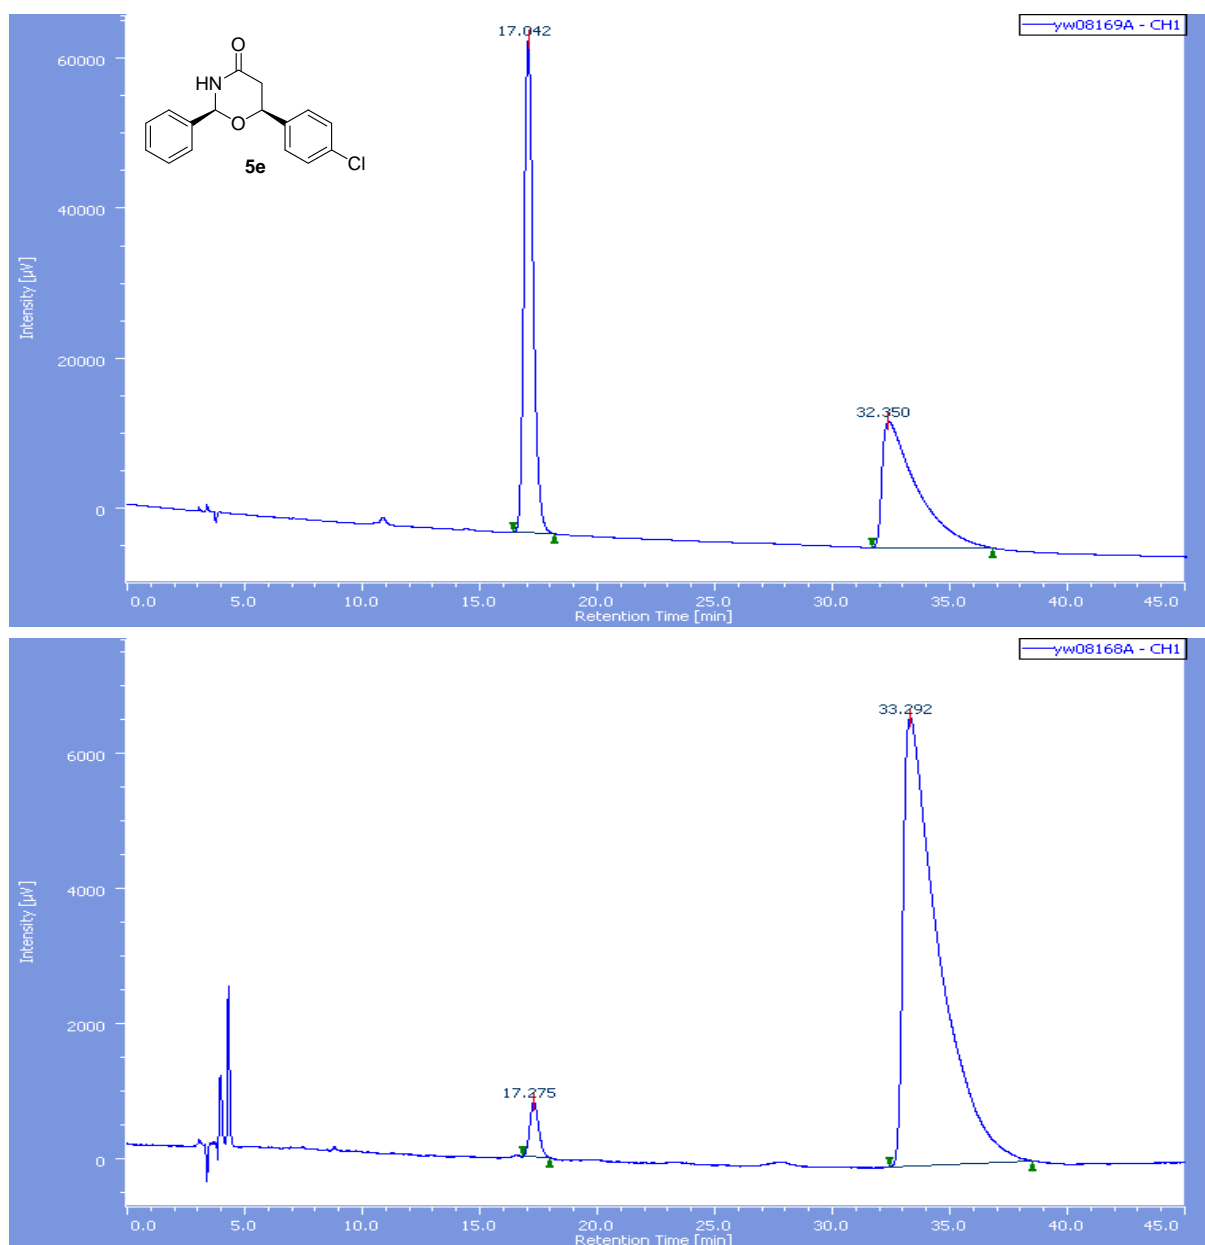

**5e (racemate)**

| PeakNo. | Time (min) | Area [m V. Sec] | Area % |
|---------|------------|-----------------|--------|
| 1       | 17.04      | 1748875         | 50.00  |
| 2       | 32.35      | 1748212         | 50.00  |

**5e**

| Peak No. | Time (min) | Area [m V. Sec] | Area % |
|----------|------------|-----------------|--------|
| 1        | 17.28      | 21161           | 2.94   |
| 2        | 33.29      | 699008          | 97.06  |

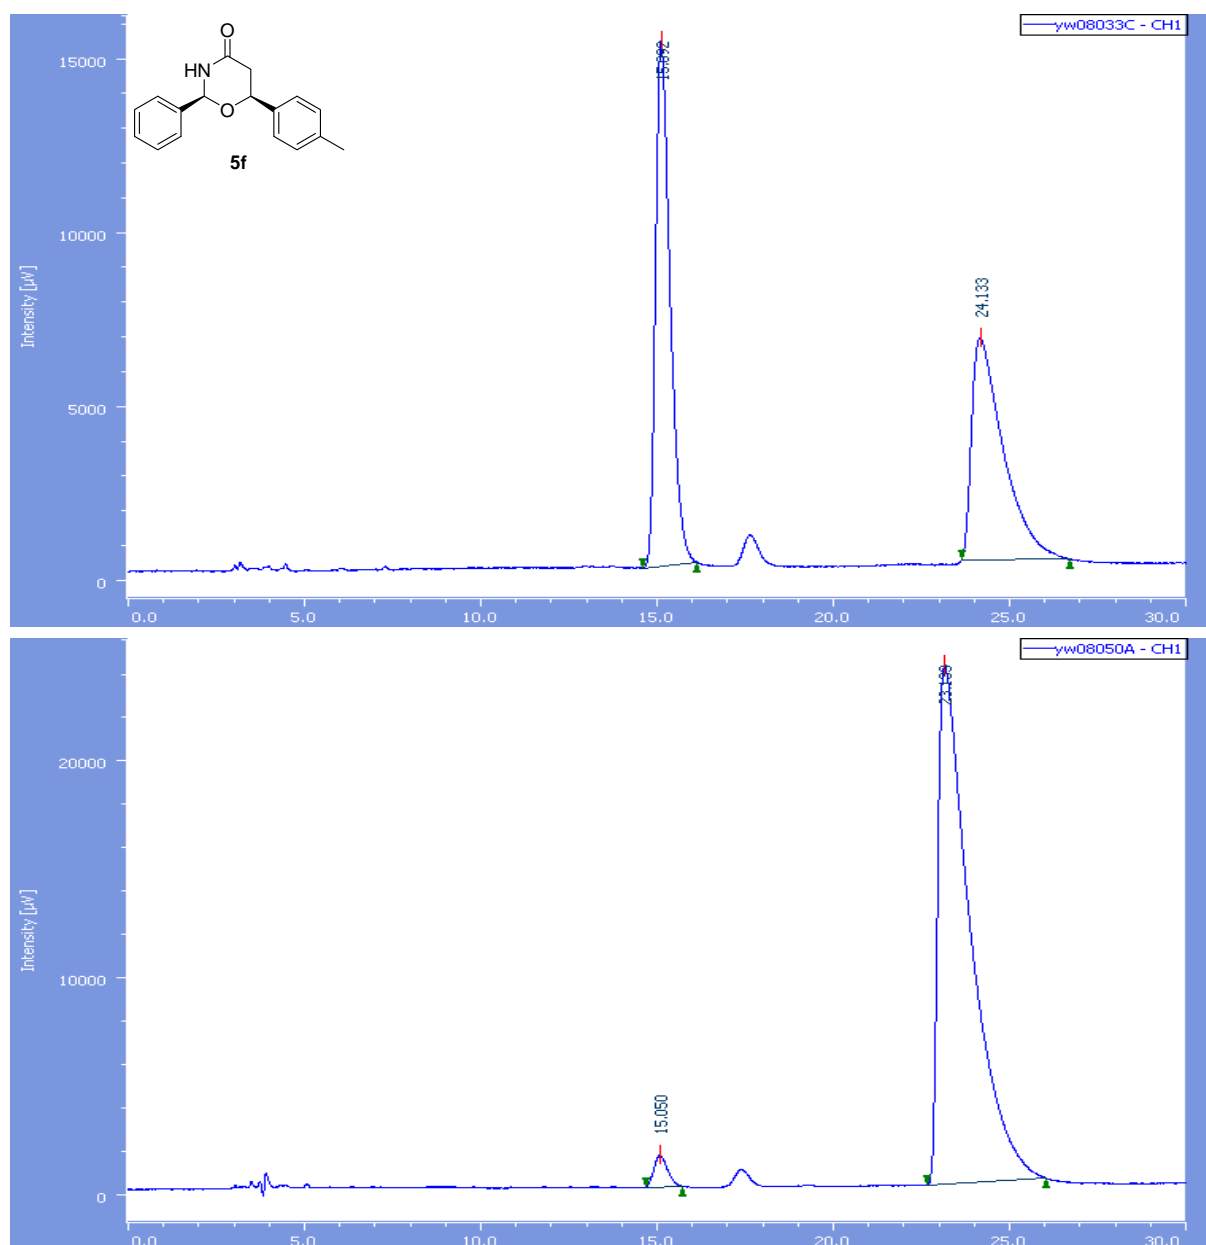

**5f (racemate)**

| Peak No. | Time (min) | Area [m V. Sec] | Area % |
|----------|------------|-----------------|--------|
| 1        | 15.09      | 432413          | 49.85  |
| 2        | 24.13      | 434893          | 50.15  |

**5f**

| Peak No. | Time (min) | Area [m V. Sec] | Area % |
|----------|------------|-----------------|--------|
| 1        | 15.05      | 34666           | 2.22   |
| 2        | 23.13      | 1526881         | 97.78  |

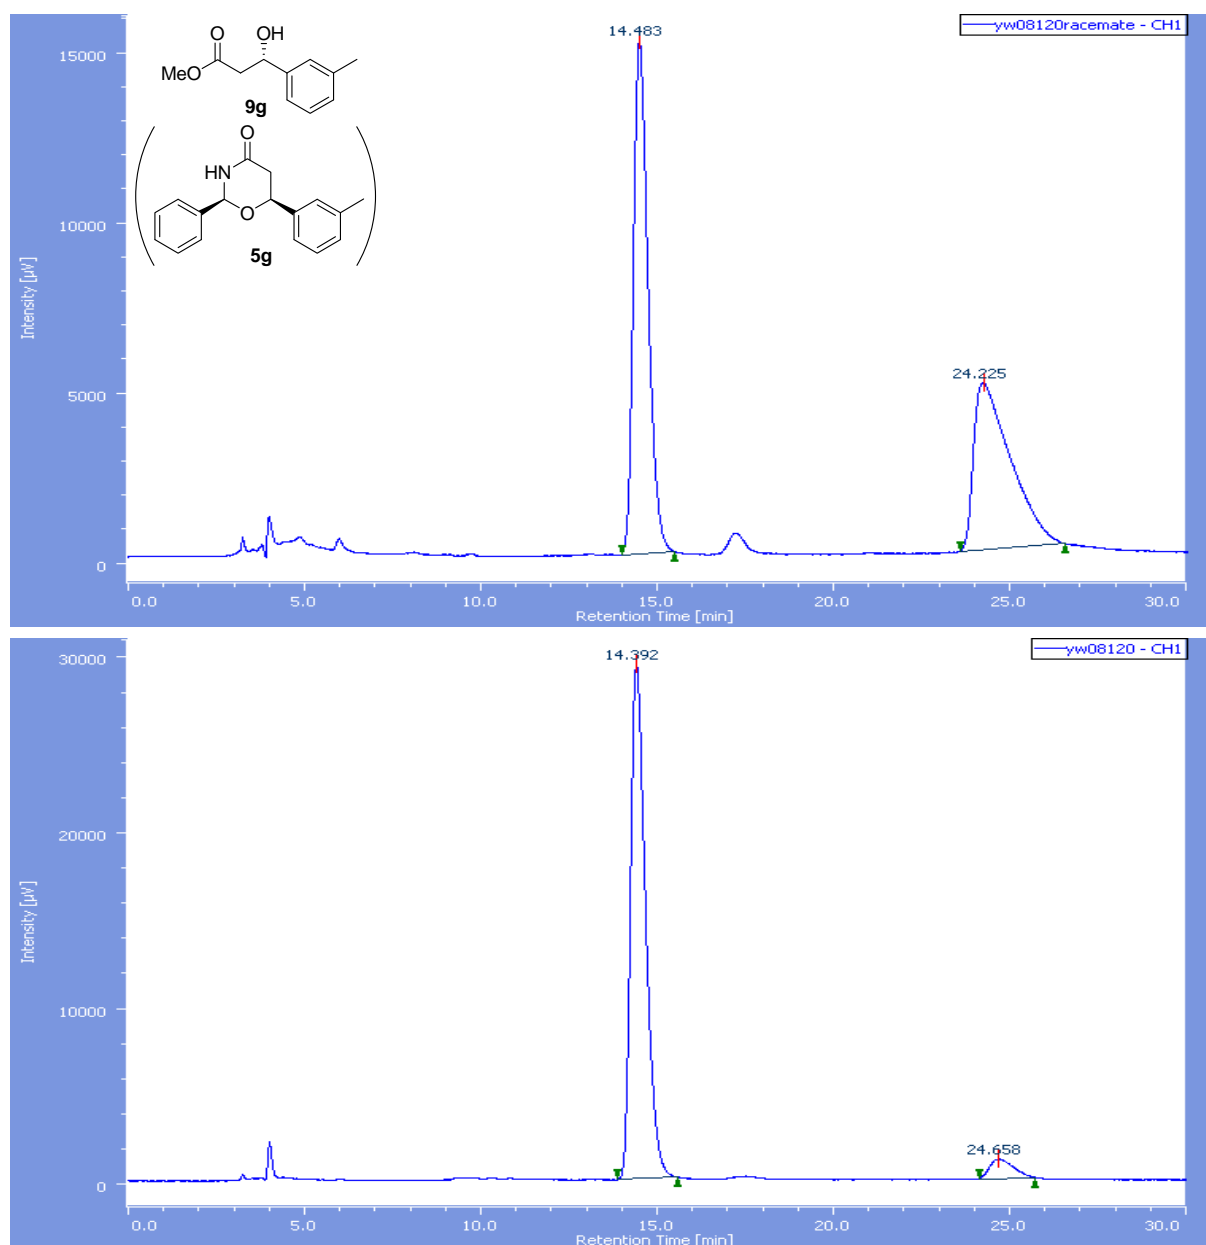

**9g (racemate)**

| Peak No. | Time (min) | Area [m V. Sec] | Area % |
|----------|------------|-----------------|--------|
| 1        | 14.48      | 446570          | 50.76  |
| 2        | 24.21      | 433125          | 49.24  |

**9g**

| Peak No. | Time (min) | Area [m V. Sec] | Area % |
|----------|------------|-----------------|--------|
| 1        | 14.39      | 878008          | 4.06   |
| 2        | 24.66      | 37155           | 95.94  |

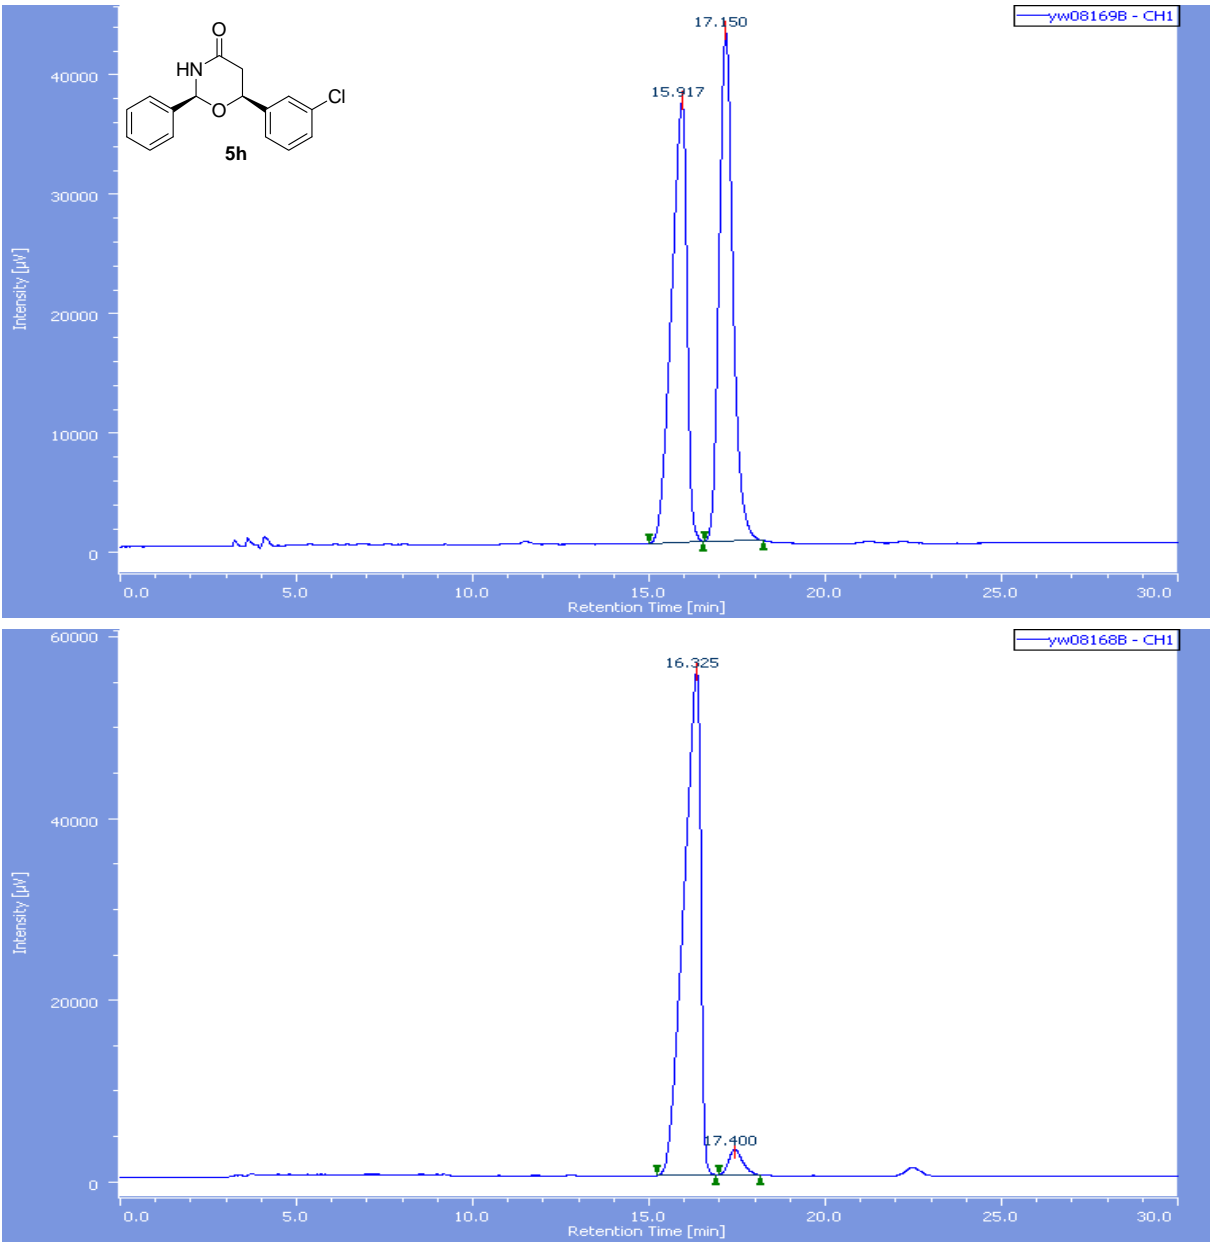

5h (racemate)

| Peak No. | Time (min) | Area [m V. Sec] | Area % |
|----------|------------|-----------------|--------|
| 1        | 15.92      | 1142620         | 50.00  |
| 2        | 17.15      | 1142401         | 50.00  |

5h

| Peak No. | Time (min) | Area [m V. Sec] | Area % |
|----------|------------|-----------------|--------|
| 1        | 16.33      | 1854828         | 95.97  |
| 2        | 17.40      | 77886           | 4.03   |

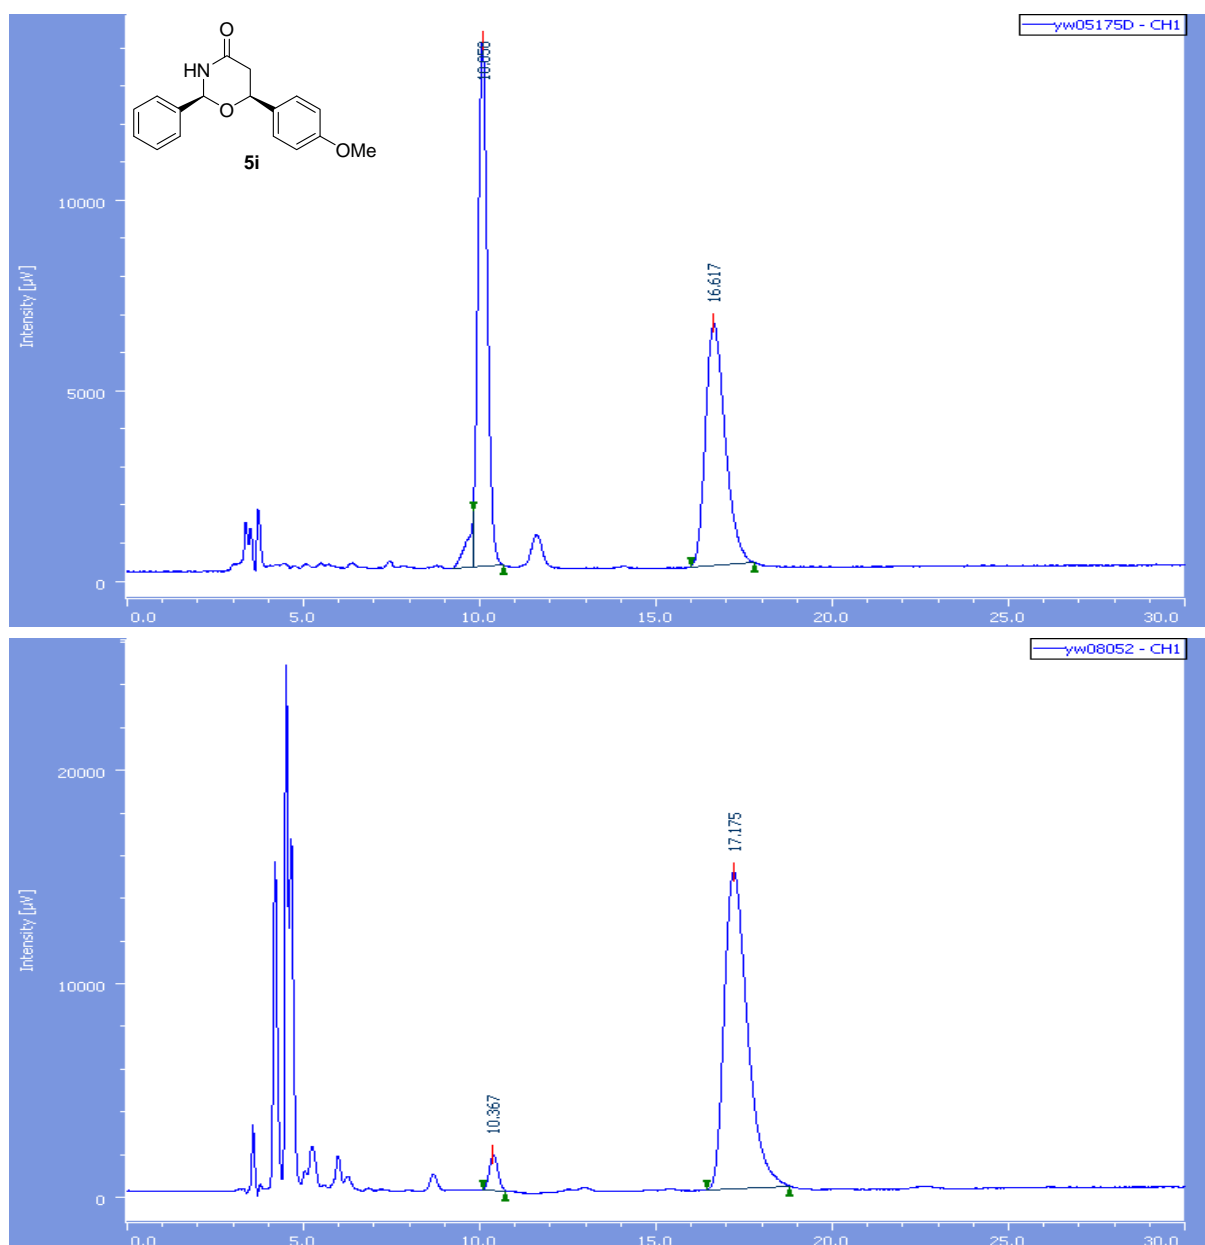

**5i (racemate)**

| Peak No. | Time (min) | Area [m V. Sec] | Area % |
|----------|------------|-----------------|--------|
| 1        | 10.06      | 254511          | 49.80  |
| 2        | 16.62      | 256513          | 50.20  |

**5i**

| Peak No. | Time (min) | Area [m V. Sec] | Area % |
|----------|------------|-----------------|--------|
| 1        | 10.37      | 28062           | 3.99   |
| 2        | 17.18      | 674969          | 96.01  |

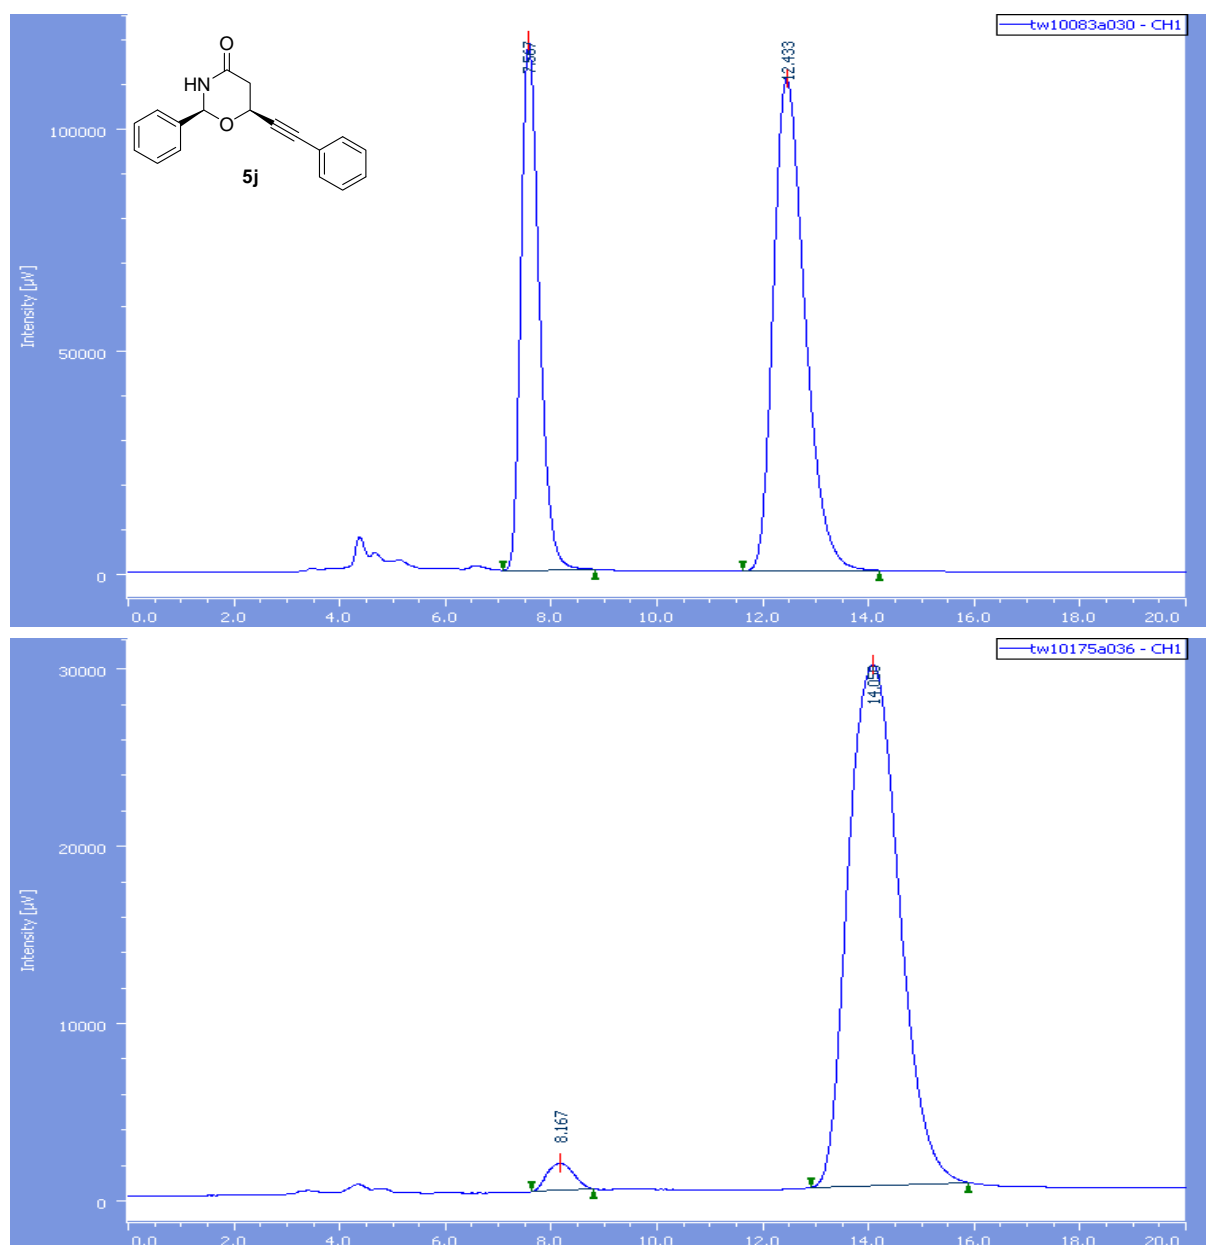

**5j (racemate)**

| Peak No. | Time (min) | Area [m V. Sec] | Area % |
|----------|------------|-----------------|--------|
| 1        | 7.57       | 4556110         | 49.97  |
| 2        | 12.43      | 4561453         | 50.03  |

**5j**

| Peak No. | Time (min) | Area [m V. Sec] | Area % |
|----------|------------|-----------------|--------|
| 1        | 8.17       | 53782           | 2.68   |
| 2        | 14.06      | 1952977         | 97.32  |



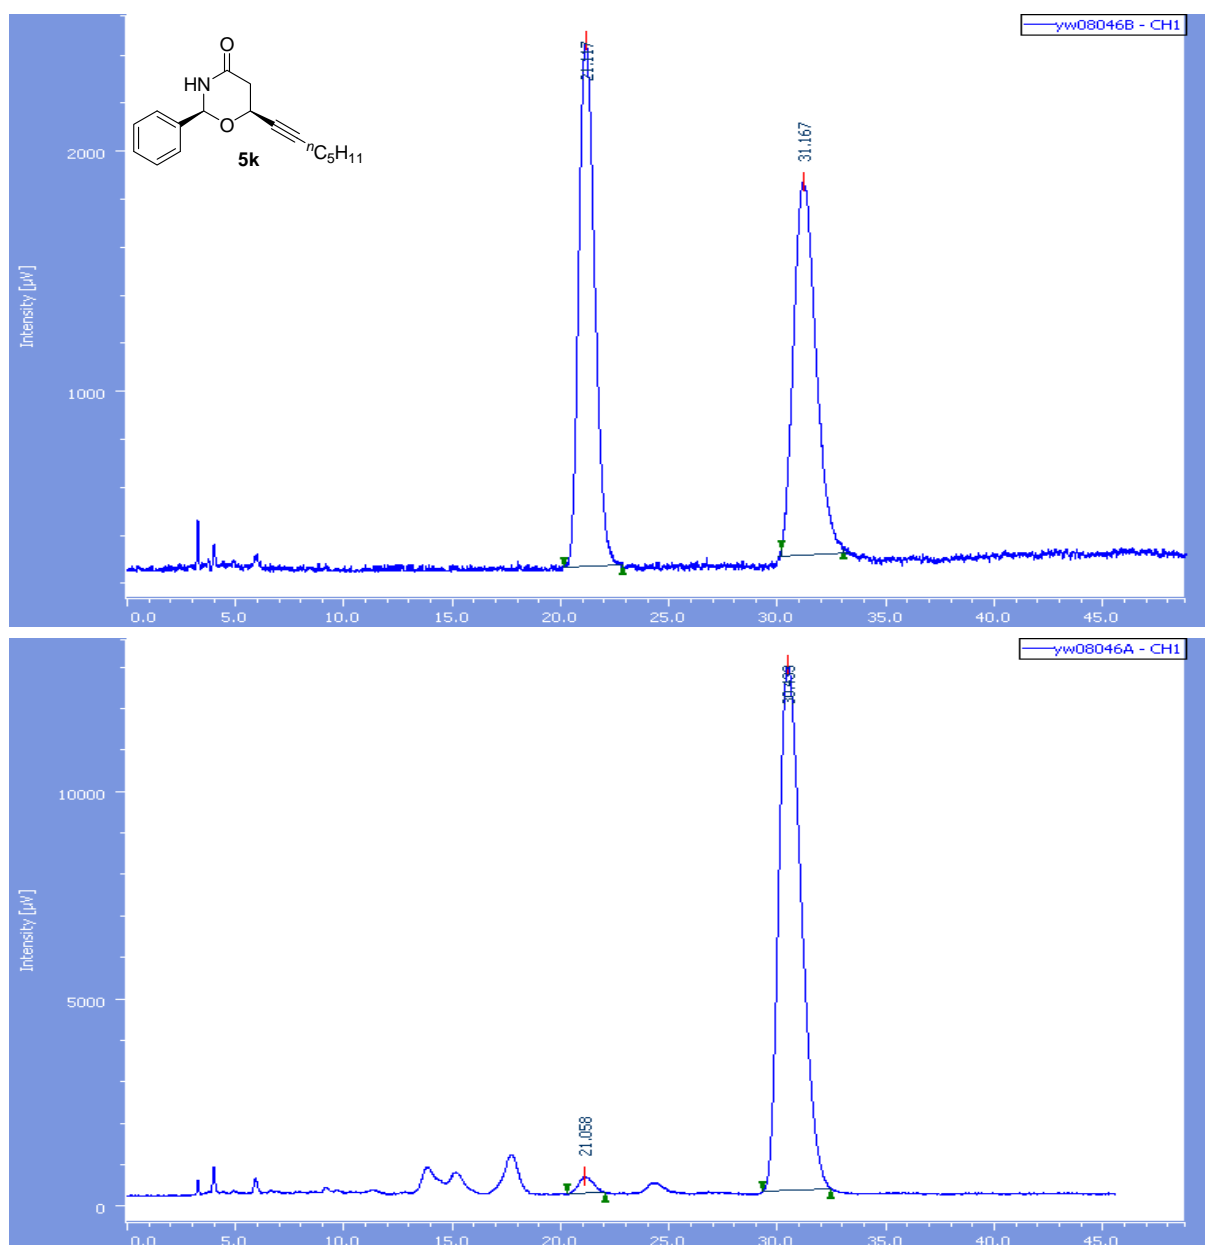

**5k (racemate)**

| Peak No. | Time (min) | Area [m V. Sec] | Area % |
|----------|------------|-----------------|--------|
| 1        | 21.12      | 111894          | 50.15  |
| 2        | 31.17      | 111237          | 49.85  |

**5k**

| Peak No. | Time (min) | Area [m V. Sec] | Area % |
|----------|------------|-----------------|--------|
| 1        | 21.06      | 18751           | 2.00   |
| 2        | 30.43      | 916885          | 98.00  |

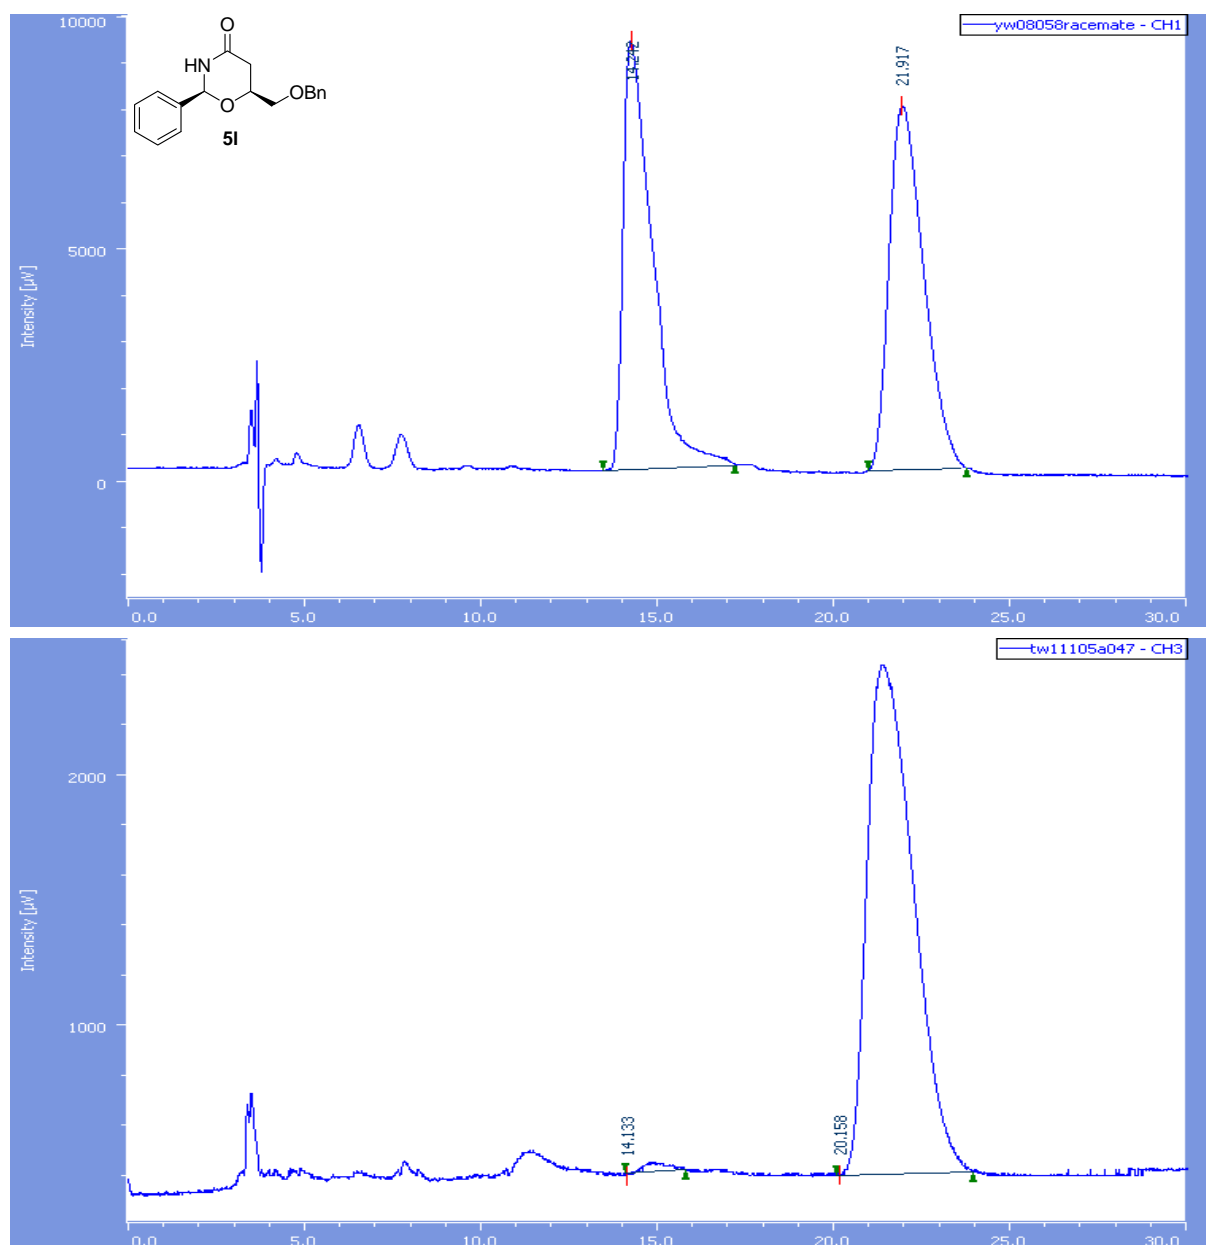

#### 5I (racemate)

| Peak No. | Time (min) | Area [m V. Sec] | Area % |
|----------|------------|-----------------|--------|
| 1        | 14.24      | 542287          | 49.93  |
| 2        | 21.92      | 543770          | 50.07  |

#### 5I

| Peak No. | Time (min) | Area [m V. Sec] | Area % |
|----------|------------|-----------------|--------|
| 1        | 14.89      | 2633            | 1.39   |
| 2        | 21.37      | 186845          | 98.61  |

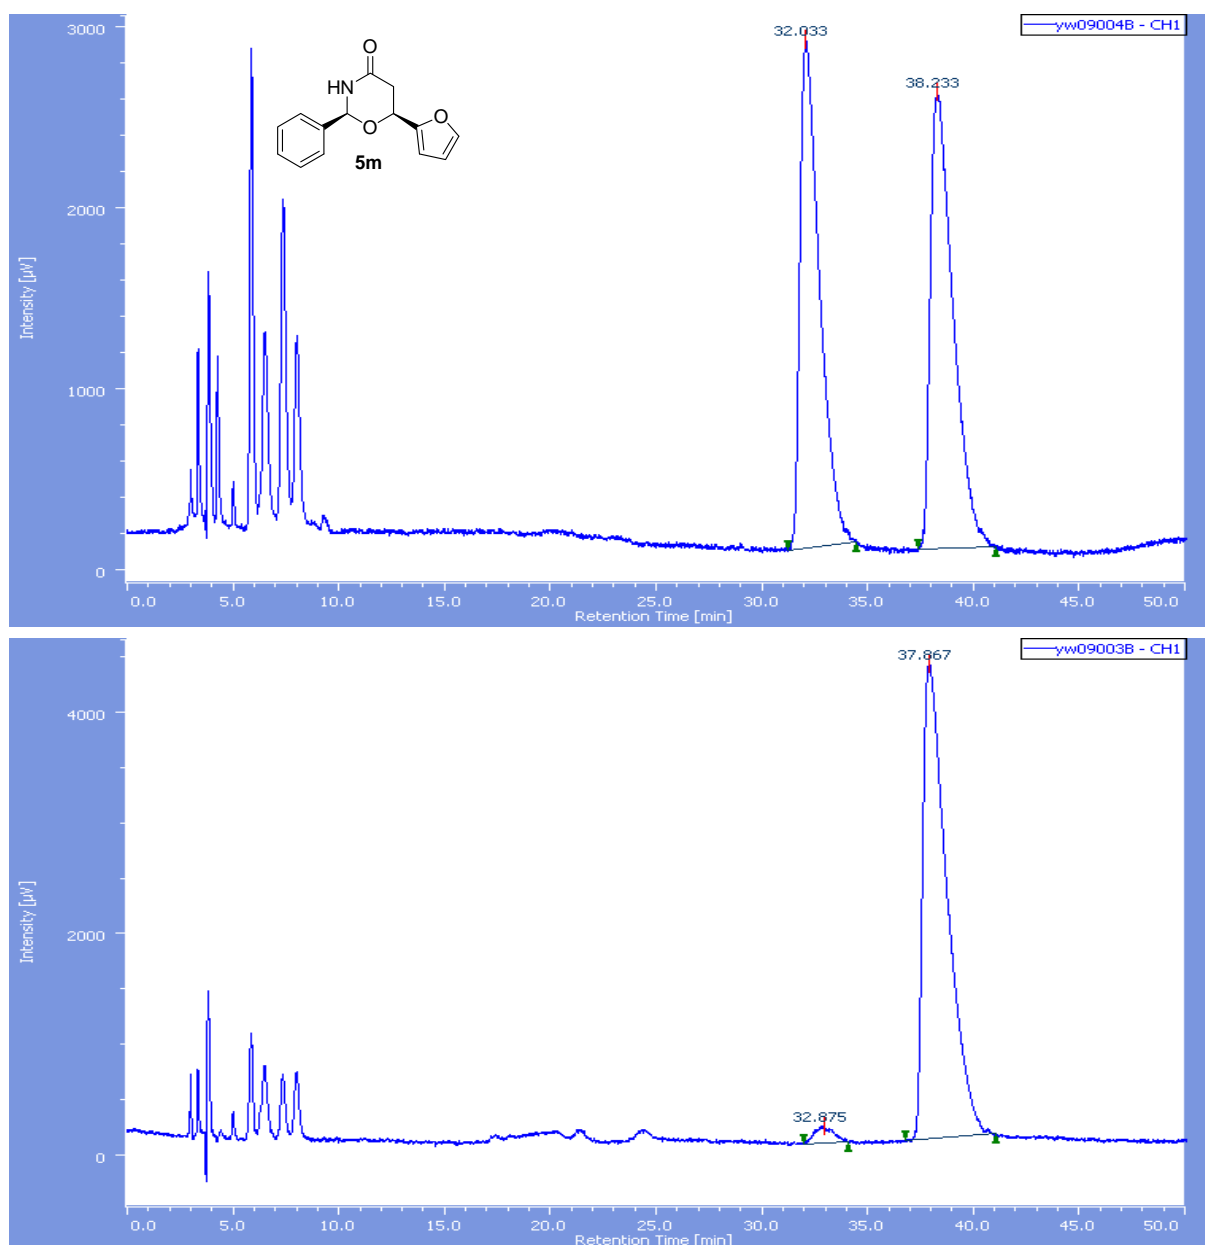

**5m (racemate)**

| Peak No. | Time (min) | Area [m V. Sec] | Area % |
|----------|------------|-----------------|--------|
| 1        | 32.03      | 182366          | 49.58  |
| 2        | 21.92      | 185412          | 50.42  |

**5m**

| Peak No. | Time (min) | Area [m V. Sec] | Area % |
|----------|------------|-----------------|--------|
| 1        | 32.88      | 9442            | 2.70   |
| 2        | 37.87      | 340778          | 97.30  |

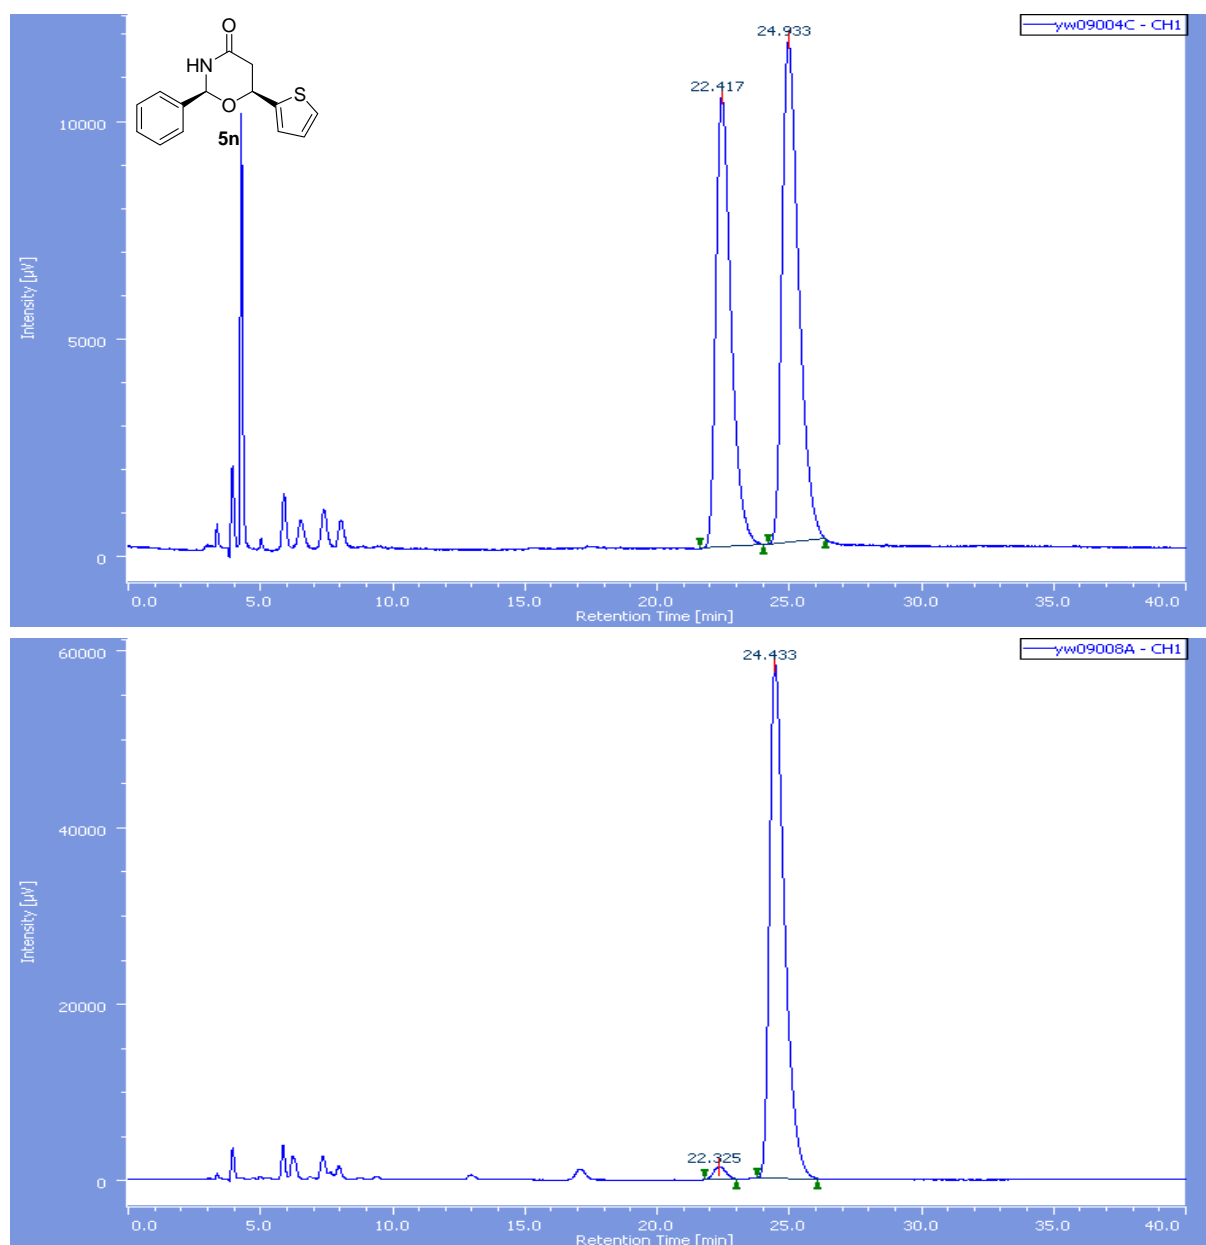

**5n (racemate)**

| Peak No. | Time (min) | Area [m V. Sec] | Area % |
|----------|------------|-----------------|--------|
| 1        | 22.42      | 441738          | 49.33  |
| 2        | 24.93      | 453638          | 50.67  |

**5n**

| Peak No. | Time (min) | Area [m V. Sec] | Area % |
|----------|------------|-----------------|--------|
| 1        | 22.33      | 46226           | 1.98   |
| 2        | 24.43      | 2291619         | 98.02  |

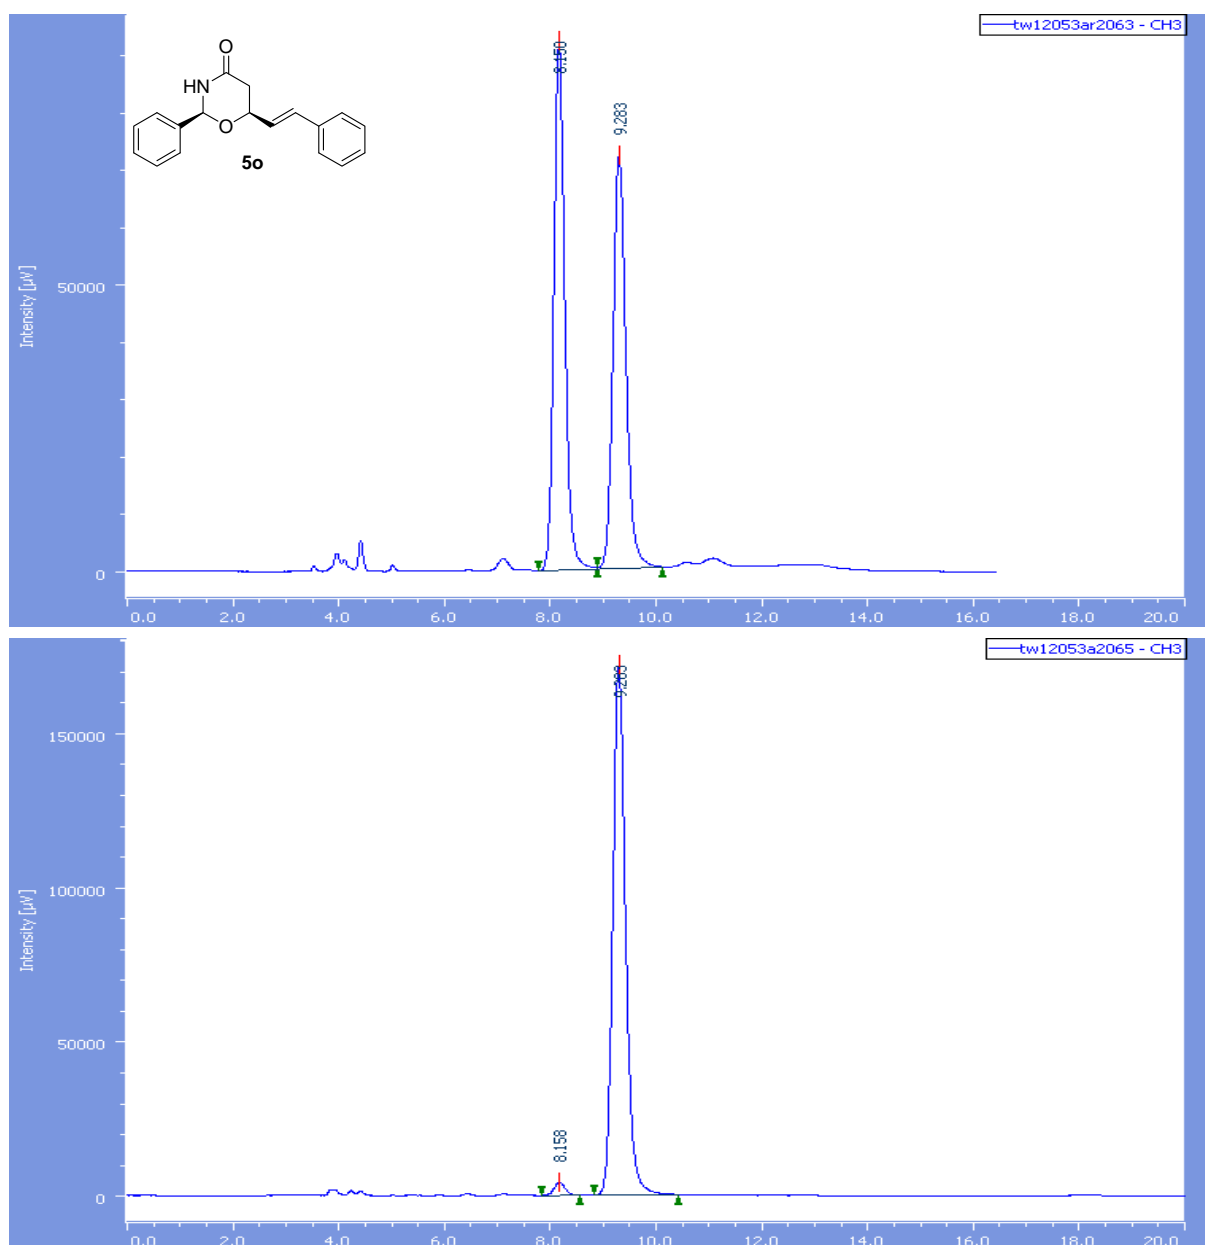

**5o (racemate)**

| Peak No. | Time (min) | Area [m V. Sec] | Area % |
|----------|------------|-----------------|--------|
| 1        | 8.15       | 1313541         | 50.21  |
| 2        | 9.28       | 1302371         | 49.79  |

**5o**

| Peak No. | Time (min) | Area [m V. Sec] | Area % |
|----------|------------|-----------------|--------|
| 1        | 8.16       | 60080           | 2.04   |
| 2        | 9.28       | 2881232         | 97.96  |

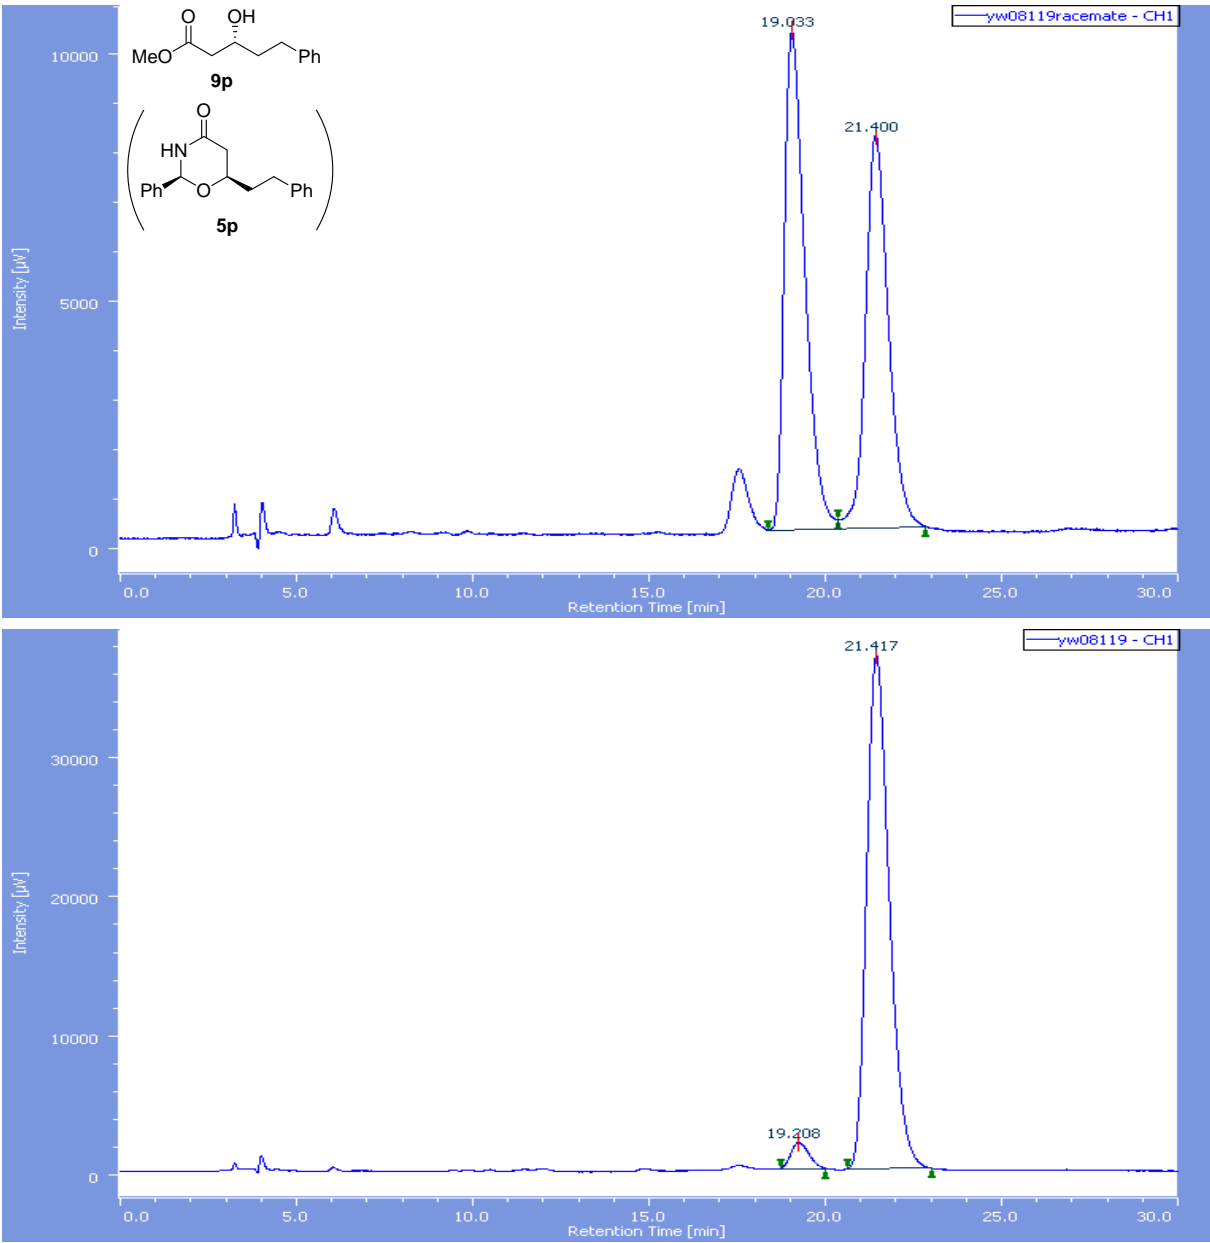

9p (racemate)

| Peak No. | Time (min) | Area [m V. Sec] | Area % |
|----------|------------|-----------------|--------|
| 1        | 19.03      | 399044          | 50.32  |
| 2        | 21.40      | 393938          | 49.68  |

9p

| Peak No. | Time (min) | Area [m V. Sec] | Area % |
|----------|------------|-----------------|--------|
| 1        | 19.21      | 66123           | 3.87   |
| 2        | 21.42      | 1642780         | 96.13  |

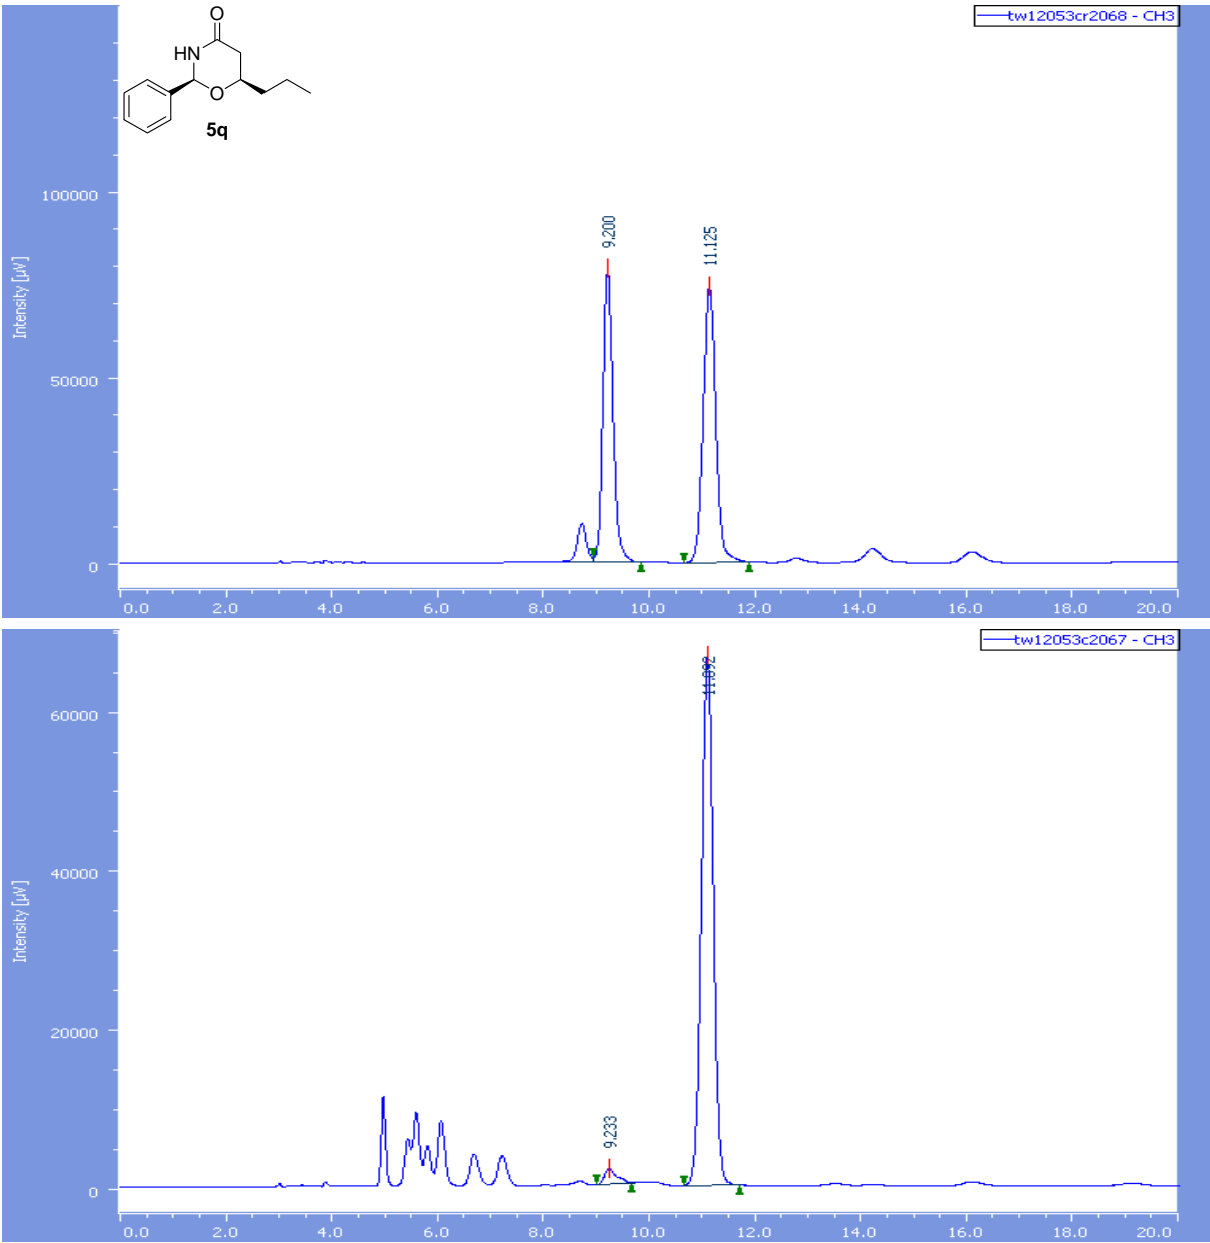

5q (racemate)

| Peak No. | Time (min) | Area [m V. Sec] | Area % |
|----------|------------|-----------------|--------|
| 1        | 9.20       | 1244922         | 50.47  |
| 2        | 11.13      | 1221583         | 49.53  |

5q

| Peak No. | Time (min) | Area [m V. Sec] | Area % |
|----------|------------|-----------------|--------|
| 1        | 9.23       | 36717           | 3.44   |
| 2        | 11.09      | 1030646         | 96.56  |



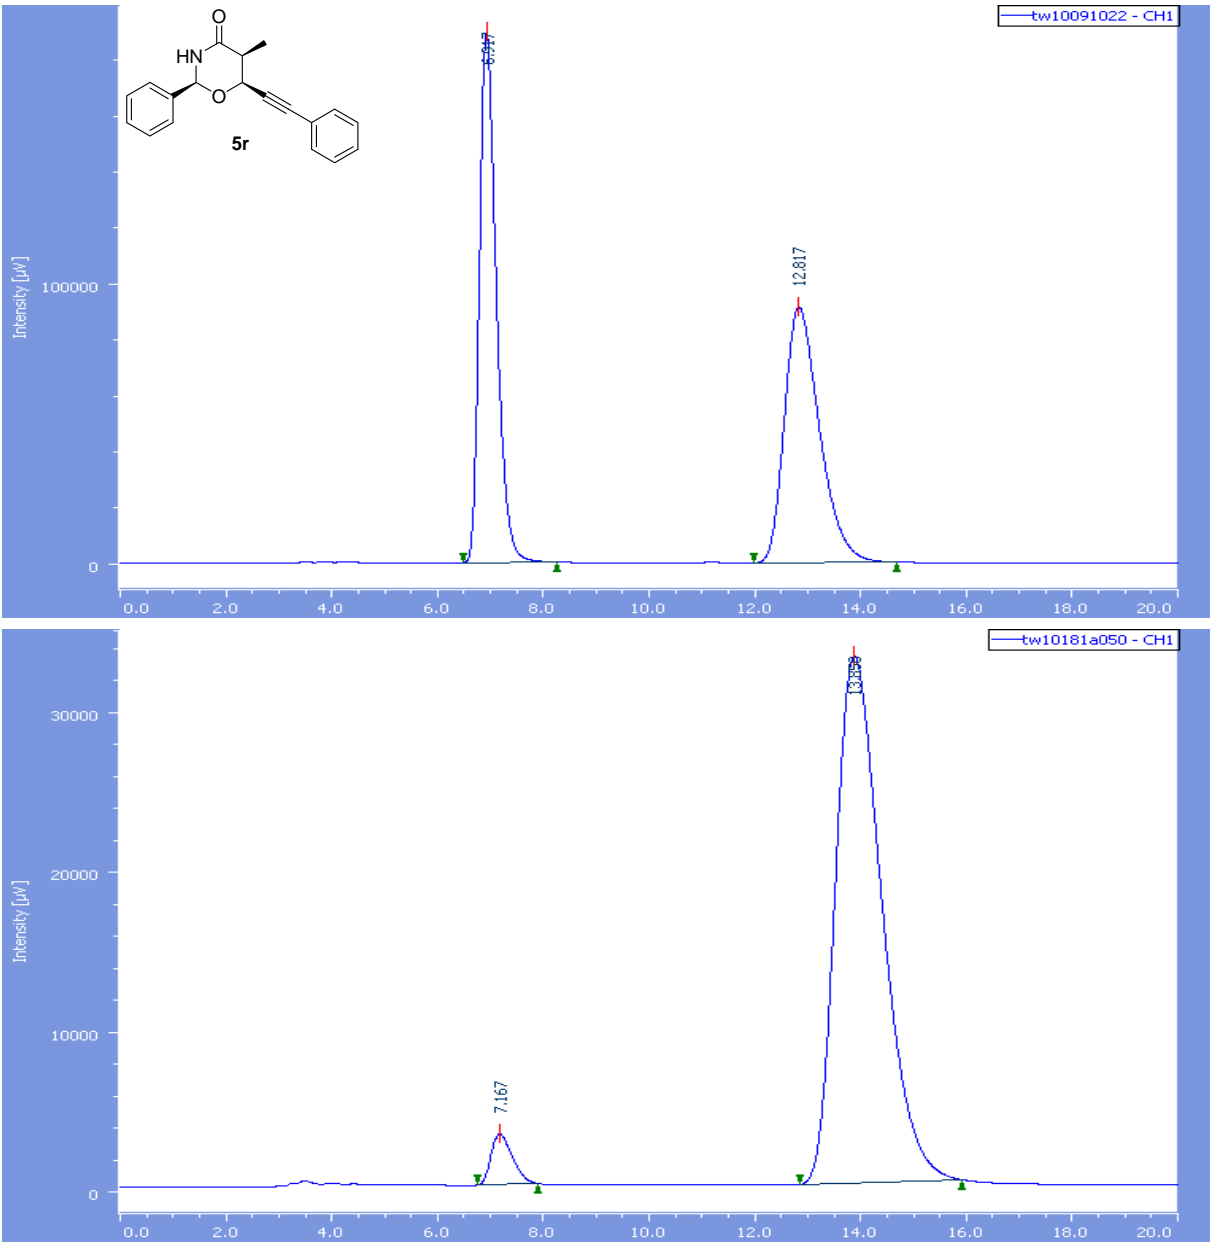

**5r (racemate)**

| Peak No. | Time (min) | Area [m V. Sec] | Area % |
|----------|------------|-----------------|--------|
| 1        | 6.92       | 4177546         | 49.89  |
| 2        | 12.82      | 4196476         | 50.11  |

**5r**

| Peak No. | Time (min) | Area [m V. Sec] | Area % |
|----------|------------|-----------------|--------|
| 1        | 7.17       | 92105           | 4.41   |
| 2        | 13.86      | 1996462         | 95.59  |

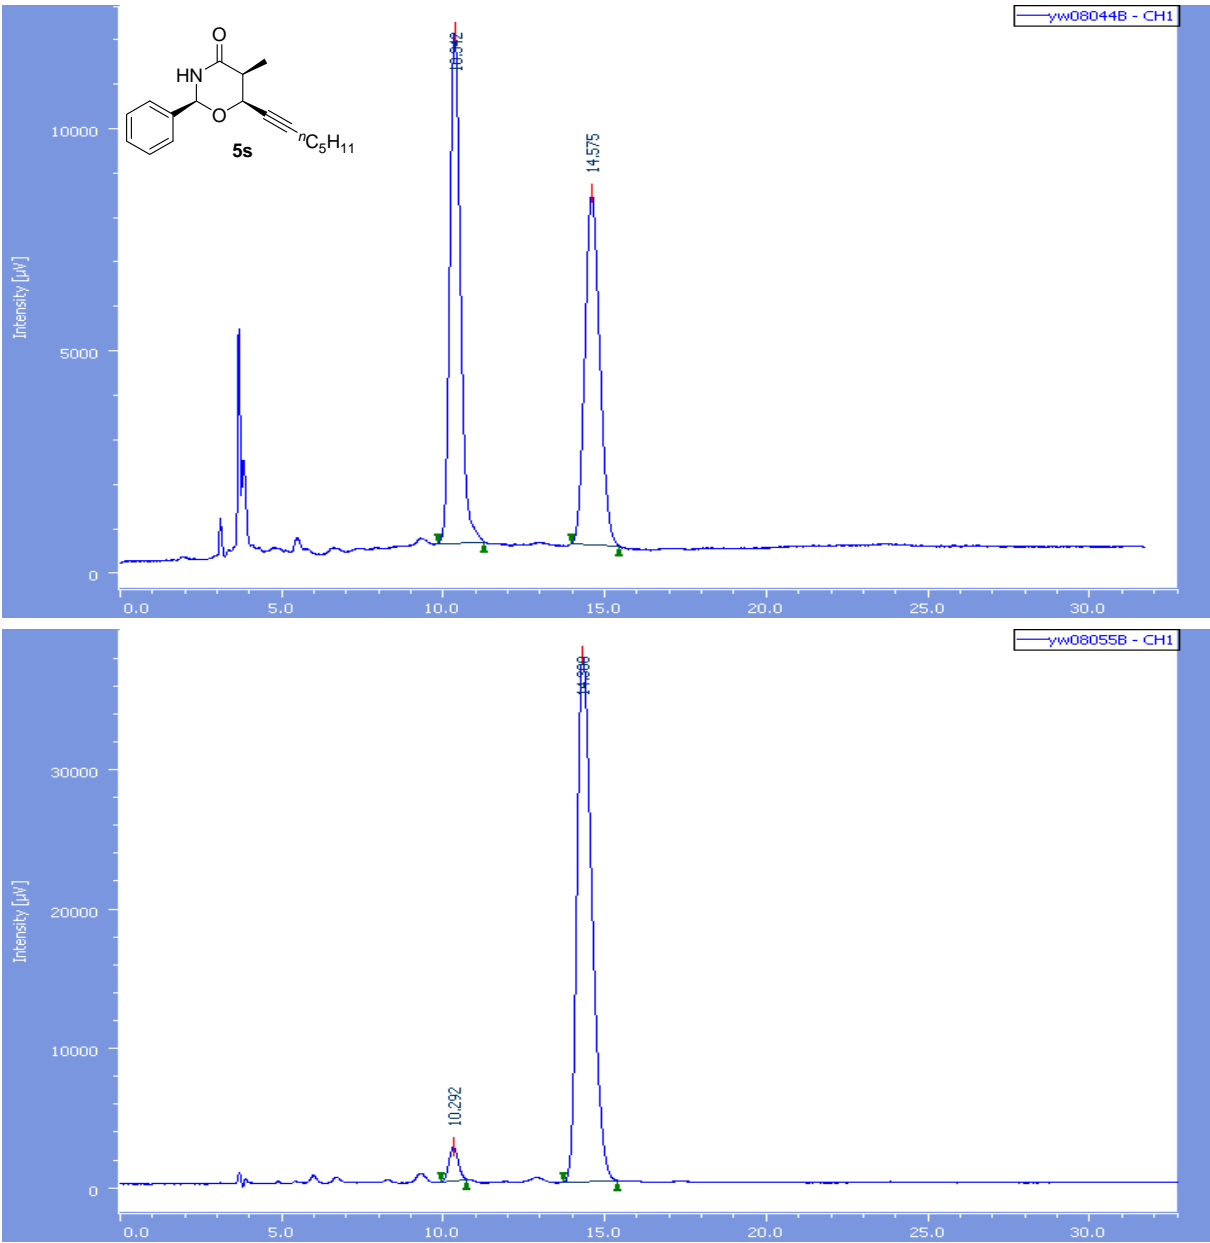

**5s (racemate)**

| Peak No. | Time (min) | Area [m V. Sec] | Area % |
|----------|------------|-----------------|--------|
| 1        | 10.34      | 253278          | 50.06  |
| 2        | 14.58      | 252574          | 49.94  |

**5s**

| Peak No. | Time (min) | Area [m V. Sec] | Area % |
|----------|------------|-----------------|--------|
| 1        | 10.29      | 47637           | 3.77   |
| 2        | 14.30      | 1217429         | 96.23  |

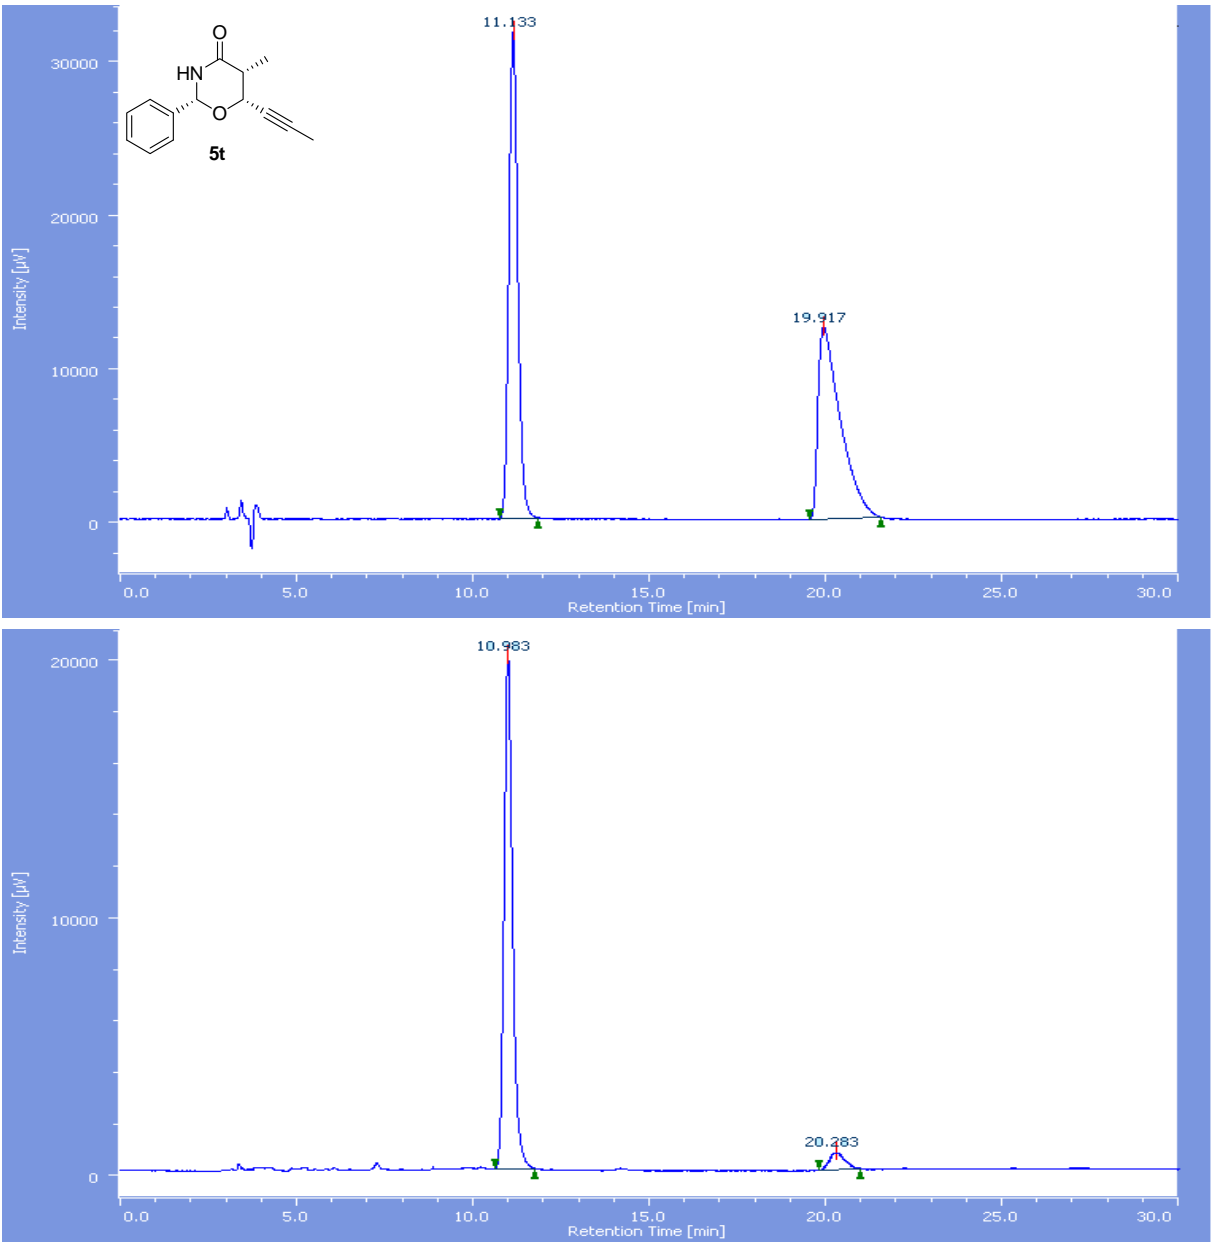

**5t (racemate)**

| Peak No. | Time (min) | Area [m V. Sec] | Area % |
|----------|------------|-----------------|--------|
| 1        | 11.13      | 557353          | 50.28  |
| 2        | 19.92      | 551208          | 49.72  |

**5t**

| Peak No. | Time (min) | Area [m V. Sec] | Area % |
|----------|------------|-----------------|--------|
| 1        | 10.98      | 333129          | 96.46  |
| 2        | 20.28      | 12213           | 3.54   |
